# Supplementary material for: LATS2 kinase integrates Hippo signalling with PPARγ repression to control brown adipocyte thermogenesis and systemic energy balance
Source: Research Square preprint supplement (doi:10.21203/rs.3.rs-7603529/v1), 2026-01-13
Supplement: Supplementary file 1 [file 07811052efd71350b8ca3279.xlsx]

## Sheet: Sheet1
Supplemental Table 1: List of differentially expressed genes in iBAT of Lats1&2fl/fl x Ucp1-CreER and control Lats1&2fl/fl mice (FDR<0.05)
Number	Gene ID	Gene name	Fold change (log2)	P value	FDR adjusted P
1	ENSMUSG00000026701	Prdx6	0.38738	2.1825e-22	2.91364e-18
2	ENSMUSG00000058793	Cds2	0.594747	1.12795e-18	7.52905e-15
3	ENSMUSG00000040021	Lats1	-0.876284	1.40194e-11	6.23864e-08
4	ENSMUSG00000065954	Tacc1	0.524247	5.5253e-10	1.49255e-06
5	ENSMUSG00000060459	Kng2	1.40068	5.59006e-10	1.49255e-06
6	ENSMUSG00000033208	S100b	-1.17927	8.93576e-10	1.98821e-06
7	ENSMUSG00000073988	Ttpa	1.30421	1.42198e-09	2.71192e-06
8	ENSMUSG00000030605	Mfge8	0.999894	2.12388e-09	3.21733e-06
9	ENSMUSG00000018340	Anxa6	0.40074	2.16899e-09	3.21733e-06
10	ENSMUSG00000038065	Mturn	1.30422	4.67089e-09	5.89002e-06
11	ENSMUSG00000023942	Slc29a1	0.806039	4.8532e-09	5.89002e-06
12	ENSMUSG00000022875	Kng1	2.07365	7.40872e-09	8.2422e-06
13	ENSMUSG00000002059	Rab34	0.4255	1.12205e-08	1.15226e-05
14	ENSMUSG00000025885	Myo5b	0.799938	3.47593e-08	3.31455e-05
15	ENSMUSG00000034006	Slc66a2	0.937293	4.81744e-08	4.28752e-05
16	ENSMUSG00000033022	Cdo1	-0.491044	6.12772e-08	5.11282e-05
17	ENSMUSG00000073460	Pnldc1	1.28706	7.02077e-08	5.51337e-05
18	ENSMUSG00000069833	Ahnak	0.812175	9.79628e-08	7.26557e-05
19	ENSMUSG00000030770	Parva	0.412745	1.8665e-07	0.000131146
20	ENSMUSG00000032401	Lctl	1.27643	2.29278e-07	0.000153043
21	ENSMUSG00000040339	Fam102b	0.874736	2.50717e-07	0.000159385
22	ENSMUSG00000021509	Slc25a48	0.876486	2.85959e-07	0.000173525
23	ENSMUSG00000025511	Tspan4	1.05601	5.88078e-07	0.000336157
24	ENSMUSG00000042185	Nfrkb	0.407918	6.04327e-07	0.000336157
25	ENSMUSG00000025348	Itga7	0.69671	6.57231e-07	0.000341527
26	ENSMUSG00000001999	Blvra	0.643658	6.65146e-07	0.000341527
27	ENSMUSG00000069919	Hba-a1	-1.00475	1.17999e-06	0.000583438
28	ENSMUSG00000021185	Dglucy	0.631522	1.4444e-06	0.000688669
29	ENSMUSG00000026074	Map4k4	-0.283406	1.51655e-06	0.000698134
30	ENSMUSG00000031490	Eif4ebp1	-0.351921	1.76866e-06	0.000787054
31	ENSMUSG00000028909	Ptpru	0.857742	1.93424e-06	0.000832971
32	ENSMUSG00000031605	Klhl2	-0.570542	2.26936e-06	0.00094675
33	ENSMUSG00000110249	9330121K16Rik	1.66104	2.84491e-06	0.00109244
34	ENSMUSG00000039157	Fam102a	0.958607	2.85548e-06	0.00109244
35	ENSMUSG00000045672	Col27a1	0.790397	2.86408e-06	0.00109244
36	ENSMUSG00000022814	Umps	0.541971	3.54011e-06	0.00131279
37	ENSMUSG00000021565	Slc6a19	0.801343	3.95544e-06	0.00142717
38	ENSMUSG00000018849	Wwc1	2.74269	4.928e-06	0.00173128
39	ENSMUSG00000034707	Gns	0.334775	5.71724e-06	0.00195705
40	ENSMUSG00000041423	Paqr6	1.15086	7.53766e-06	0.00245342
41	ENSMUSG00000069917	Hba-a2	-0.858999	7.66059e-06	0.00245342
42	ENSMUSG00000021286	Zfyve21	0.415144	7.71864e-06	0.00245342
43	ENSMUSG00000079020	Slc45a4	0.864506	1.09832e-05	0.00340991
44	ENSMUSG00000017390	Aldoc	1.40781	1.2412e-05	0.00376592
45	ENSMUSG00000005575	Ube2m	-0.252017	1.53319e-05	0.00454846
46	ENSMUSG00000078234	Klhdc7a	0.672844	1.64183e-05	0.00476488
47	ENSMUSG00000026623	Lpgat1	0.66137	1.6943e-05	0.00481254
48	ENSMUSG00000038803	Ost4	-0.243106	2.00117e-05	0.00556575
49	ENSMUSG00000022751	Nit2	0.250537	2.21828e-05	0.00604369
50	ENSMUSG00000057561	Eif1a	0.849101	2.27852e-05	0.00608365
51	ENSMUSG00000022091	Sorbs3	0.526847	2.50875e-05	0.00650797
52	ENSMUSG00000038582	Pptc7	0.469593	2.53494e-05	0.00650797
53	ENSMUSG00000021048	Mthfd1	0.332858	2.66581e-05	0.00671482
54	ENSMUSG00000019768	Esr1	0.915498	2.90517e-05	0.00718224
55	ENSMUSG00000089774	Slc5a3	1.04907	4.10995e-05	0.00997596
56	ENSMUSG00000044674	Fzd1	0.71652	4.21298e-05	0.0100434
57	ENSMUSG00000051236	Msrb3	0.652576	4.33942e-05	0.0101634
58	ENSMUSG00000040158	Tax1bp3	0.388298	4.50756e-05	0.0103489
59	ENSMUSG00000027165	Iftap	0.475437	4.57367e-05	0.0103489
60	ENSMUSG00000052305	Hbb-bs	-0.82539	4.67303e-05	0.0103975
61	ENSMUSG00000038618	Rassf7	1.89785	4.81515e-05	0.0105381
62	ENSMUSG00000038459	Abhd17c	0.39404	4.97885e-05	0.0107206
63	ENSMUSG00000062210	Tnfaip8	0.441302	5.21592e-05	0.0109312
64	ENSMUSG00000039831	Arhgap29	0.436296	5.24043e-05	0.0109312
65	ENSMUSG00000031996	Aplp2	0.537168	5.42902e-05	0.0111504
66	ENSMUSG00000079555	Haus3	-0.560919	6.09855e-05	0.0123357
67	ENSMUSG00000042700	Sipa1l1	0.382117	6.44111e-05	0.0128342
68	ENSMUSG00000021494	Ddx41	0.33819	6.91998e-05	0.0134504
69	ENSMUSG00000029534	St7	-0.612789	6.95191e-05	0.0134504
70	ENSMUSG00000021411	Pxdc1	0.921568	7.12105e-05	0.0135809
71	ENSMUSG00000073481	Mtarc2	0.37792	7.94156e-05	0.0149324
72	ENSMUSG00000059146	Ntrk3	0.453189	8.11129e-05	0.0150397
73	ENSMUSG00000033377	Palmd	0.444446	8.88157e-05	0.0162423
74	ENSMUSG00000078674	Mup18	-7.85391	9.30927e-05	0.0167944
75	ENSMUSG00000021215	Net1	-1.35095	9.94661e-05	0.0176131
76	ENSMUSG00000003526	Prodh	0.521208	0.000101353	0.0176131
77	ENSMUSG00000024308	Tapbp	0.386828	0.000101589	0.0176131
78	ENSMUSG00000028413	B4galt1	-0.428867	0.00011667	0.0197702
79	ENSMUSG00000109865	Hspa14	0.251224	0.000116992	0.0197702
80	ENSMUSG00000068115	Ninl	0.714166	0.000133208	0.0222291
81	ENSMUSG00000027961	Lrrc39	-0.532852	0.000138451	0.0228187
82	ENSMUSG00000010660	Plcd1	0.394137	0.000142872	0.0232602
83	ENSMUSG00000016128	Stard13	0.513325	0.000145771	0.0234464
84	ENSMUSG00000024957	Kcnk4	1.30348	0.000150538	0.0239249
85	ENSMUSG00000024646	Cyb5a	0.280933	0.000156445	0.0244871
86	ENSMUSG00000079057	Cyp4v3	0.411107	0.000157745	0.0244871
87	ENSMUSG00000032412	Atp1b3	0.464216	0.000171791	0.0262098
88	ENSMUSG00000039960	Rhou	-0.762208	0.000172769	0.0262098
89	ENSMUSG00000029638	Glcci1	0.552562	0.000182781	0.0274171
90	ENSMUSG00000035151	Elmod2	1.94918	0.000193179	0.0286548
91	ENSMUSG00000037440	Vnn1	1.44831	0.000210576	0.0308922
92	ENSMUSG00000022419	Deptor	0.735695	0.000215701	0.0313001
93	ENSMUSG00000040105	Plpp6	-0.369682	0.000219291	0.0314789
94	ENSMUSG00000031563	Wwc2	0.301996	0.000230843	0.0325974
95	ENSMUSG00000042429	Adora1	0.502651	0.000231967	0.0325974
96	ENSMUSG00000038970	Lmtk2	0.464219	0.000238912	0.0329203
97	ENSMUSG00000001576	Ergic1	-0.344338	0.000240184	0.0329203
98	ENSMUSG00000052957	Gas1	0.853761	0.000243291	0.0329203
99	ENSMUSG00000028556	Dock7	-0.520948	0.000244128	0.0329203
100	ENSMUSG00000028803	Nipal3	0.372703	0.00024787	0.0330906
101	ENSMUSG00000052926	Rnaseh2a	0.690422	0.000255236	0.0337366
102	ENSMUSG00000022853	Ehhadh	-1.18472	0.000285221	0.0373303
103	ENSMUSG00000050628	Ubald2	-0.374971	0.000306335	0.0397046
104	ENSMUSG00000019732	Calr3	0.613733	0.000312282	0.0400862
105	ENSMUSG00000032531	Amotl2	1.17384	0.000333339	0.0421327
106	ENSMUSG00000028266	Lmo4	0.600437	0.000339031	0.0421327
107	ENSMUSG00000050627	Gpd1l	0.335728	0.000339119	0.0421327
108	ENSMUSG00000020142	Slc1a4	1.01083	0.000340849	0.0421327
109	ENSMUSG00000028553	Angptl3	-1.33398	0.000349787	0.0428409
110	ENSMUSG00000057329	Bcl2	0.666911	0.000359615	0.0436442
111	ENSMUSG00000031709	Tbc1d9	0.6885	0.000370652	0.0444136
112	ENSMUSG00000049327	Kmt5a	-0.302306	0.000374019	0.0444136
113	ENSMUSG00000041974	Spidr	0.356118	0.00037904	0.0444136
114	ENSMUSG00000047221	Fam185a	0.407227	0.000379262	0.0444136
115	ENSMUSG00000022905	Kpna1	-0.327286	0.000388488	0.0450984
116	ENSMUSG00000036580	Spg20	0.436182	0.000407697	0.0467815
117	ENSMUSG00000050052	Tdrp	0.690997	0.000409996	0.0467815
118	ENSMUSG00000030685	Kctd13	0.376287	0.000418729	0.0472604
119	ENSMUSG00000034312	Iqsec1	0.281765	0.000421273	0.0472604
120	ENSMUSG00000014077	Chp1	0.290978	0.000432035	0.0477308
121	ENSMUSG00000084786	Ubl5	-0.238435	0.000432617	0.0477308
