# Supplementary material for: LATS2 kinase integrates Hippo signalling with PPARγ repression to control brown adipocyte thermogenesis and systemic energy balance
Source: Research Square preprint supplement (doi:10.21203/rs.3.rs-7603529/v1), 2026-01-13
Supplement: Supplementary file 2 [file 2c01ebd0a0795dd4da38fa75.xlsx]

## Sheet: Sheet1
Supplemental Table 5: Sequences of siRNAs used in the study.
siRNA use	Number	Gene name	Species	Sense siRNA sequence
Functional and mechanistic studies in iBAs and hMADS cells	1	LATS1 #1	human	GCAGAGUACUAGCAAAUUU
	2	LATS1 #2	human	GCAGUUGAAAGUGUUCAUA
	3	LATS1 #3	human	GGUUGGGACUCCCAAUUAU
	4	LATS2 #1	human	GGACCAAACAGUGACACUU
	5	LATS2 #2	human	GCCACGACUUAUUCUGGAA
	6	LATS2 #3	human	GGAAGAUCCUCUACCAGAA
	7	Yap1 #1	mouse	CCACCAAGCUAGAUAAAGA
	8	Yap1 #2	mouse	GGUCAGAGAUACUUCUUAA
	9	Yap1 #3	mouse	AGAACAAUGACGACCAAUA
	10	Taz #1	mouse	CCACAGGGCUCAUGAGUGU
	11	Taz #2	mouse	GGAUUAGGAUGCGUCAAGA
	12	Taz #3	mouse	CGAGAUGGAUACAGGUGAA
	13	Lats1 #1	mouse	GCAGAGUACUAGCAAAUUU
	14	Lats1 #2	mouse	GCAGUUGAAAGUGUUCAUA
	15	Lats1 #3	mouse	GGUUGGGACUCCCAAUUAU
	16	Lats2 #1	mouse	GGACCAAACAGUGACACUU
	17	Lats2 #2	mouse	GGUCGUGGUCAUCUACUAU
	18	Lats2 #3	mouse	GCAGGUUCUUCGAUGACAA
	19	Control #1	-	UGGUUUACAUGUCGACUAA
	20	Control #2	-	UGGUUUACAUGUUUUCUGA
	21	Control #3	-	UGGUUUACAUGUUUUCCUA
