# Supplementary material for: LATS2 kinase integrates Hippo signalling with PPARγ repression to control brown adipocyte thermogenesis and systemic energy balance
Source: Research Square preprint supplement (doi:10.21203/rs.3.rs-7603529/v1), 2026-01-13
Supplement: Supplementary file 3 [file 5f708e1a71b9bd823c8b4b1b.xlsx]

## Sheet: Sheet1
Supplemental Table 3: List of differentially expressed genes in iBAT of Lats1&2fl/fl x Ucp1-CreER and control Lats1&2fl/fl mice (FDR<0.05)
Number	Gene ID	Gene name	Fold change (log2)	P value	FDR adjusted P
1	ENSMUSG00000035151	Elmod2	2.41684	2.56272e-87	3.50657e-83
2	ENSMUSG00000018849	Wwc1	4.43704	2.46873e-33	1.68898e-29
3	ENSMUSG00000029335	Bmp3	2.44805	1.34589e-25	6.1386e-22
4	ENSMUSG00000031274	Col4a5	2.12249	6.10219e-25	2.08741e-21
5	ENSMUSG00000037833	Sh2d4b	3.17045	4.15442e-22	1.1369e-18
6	ENSMUSG00000041559	Fmod	4.26505	1.38687e-19	3.16276e-16
7	ENSMUSG00000020782	Llgl2	1.53263	3.5578e-19	6.95448e-16
8	ENSMUSG00000027075	Slc43a1	2.30966	1.38278e-18	2.36508e-15
9	ENSMUSG00000037315	Jade3	2.41352	1.7964e-18	2.73113e-15
10	ENSMUSG00000004110	Cacna1e	2.27403	7.69845e-18	1.05338e-14
11	ENSMUSG00000004035	Gstm7	1.19802	9.23515e-17	1.14877e-13
12	ENSMUSG00000029641	Rasl11a	2.92498	1.66552e-15	1.89911e-12
13	ENSMUSG00000039037	St6galnac5	1.39819	3.85171e-15	4.05407e-12
14	ENSMUSG00000040021	Lats1	-0.556524	5.67109e-15	5.54268e-12
15	ENSMUSG00000026655	Fam107b	0.797899	1.08776e-14	9.92253e-12
16	ENSMUSG00000019818	Cd164	0.513395	1.39569e-14	1.19358e-11
17	ENSMUSG00000053964	Lgals4	1.40178	2.17235e-14	1.74849e-11
18	ENSMUSG00000022178	Ajuba	1.618	2.66133e-14	2.02305e-11
19	ENSMUSG00000068874	Selenbp1	1.13959	4.46188e-14	3.21326e-11
20	ENSMUSG00000039629	Strip2	1.21587	1.28661e-13	8.39166e-11
21	ENSMUSG00000033208	S100b	-3.50895	1.28791e-13	8.39166e-11
22	ENSMUSG00000008153	Clstn3	-1.92566	1.59383e-13	9.91291e-11
23	ENSMUSG00000062372	Otof	2.55984	2.1486e-13	1.27823e-10
24	ENSMUSG00000025271	Pfkfb1	0.760029	4.32881e-13	2.46796e-10
25	ENSMUSG00000024065	Ehd3	1.02413	8.81613e-13	4.82524e-10
26	ENSMUSG00000050931	Sgms2	1.37216	9.70606e-13	5.108e-10
27	ENSMUSG00000022180	Slc7a8	1.56955	1.1121e-12	5.6359e-10
28	ENSMUSG00000031383	Dusp9	2.52616	1.2908e-12	6.09033e-10
29	ENSMUSG00000059495	Arhgef12	-0.415664	1.27734e-12	6.09033e-10
30	ENSMUSG00000057969	Sema3b	1.34351	1.37681e-12	6.27964e-10
31	ENSMUSG00000030591	Psmd8	-0.601595	1.85727e-12	8.19777e-10
32	ENSMUSG00000031967	Afg3l1	-0.589101	2.03412e-12	8.69778e-10
33	ENSMUSG00000053024	Cntn2	6.18537	2.40943e-12	9.99038e-10
34	ENSMUSG00000028556	Dock7	-0.742598	3.71386e-12	1.49461e-09
35	ENSMUSG00000044349	Snhg11	1.25961	9.40581e-12	3.67713e-09
36	ENSMUSG00000022309	Angpt1	0.976611	1.24146e-11	4.7186e-09
37	ENSMUSG00000055723	Rras2	0.588229	1.32751e-11	4.90927e-09
38	ENSMUSG00000059921	Unc5c	2.52165	1.71812e-11	6.18658e-09
39	ENSMUSG00000047409	Ctdspl	0.885235	1.78242e-11	6.25356e-09
40	ENSMUSG00000034707	Gns	0.451103	1.85685e-11	6.35184e-09
41	ENSMUSG00000029165	Agbl5	0.837396	1.91972e-11	6.40672e-09
42	ENSMUSG00000055737	Ghr	0.875923	2.7929e-11	9.09886e-09
43	ENSMUSG00000026074	Map4k4	-0.50799	2.96292e-11	9.42828e-09
44	ENSMUSG00000051236	Msrb3	0.515103	4.84278e-11	1.506e-08
45	ENSMUSG00000032531	Amotl2	1.13264	4.95872e-11	1.50778e-08
46	ENSMUSG00000036459	Wtip	1.15357	5.36725e-11	1.59652e-08
47	ENSMUSG00000041229	Phf8	0.945388	1.02763e-10	2.92938e-08
48	ENSMUSG00000008393	Carhsp1	-0.588355	1.02752e-10	2.92938e-08
49	ENSMUSG00000033491	Prss35	4.68957	1.17874e-10	3.29157e-08
50	ENSMUSG00000024143	Rhoq	-0.651702	1.579e-10	4.32108e-08
51	ENSMUSG00000035835	Plppr3	1.98944	1.92769e-10	5.17188e-08
52	ENSMUSG00000044813	Shb	-0.987746	2.27925e-10	5.9975e-08
53	ENSMUSG00000062480	Acat3	1.6506	2.83855e-10	7.19256e-08
54	ENSMUSG00000044337	Ackr3	-1.30777	2.83538e-10	7.19256e-08
55	ENSMUSG00000078485	Plekhn1	1.06654	2.97644e-10	7.40485e-08
56	ENSMUSG00000058793	Cds2	0.818358	3.37895e-10	8.15716e-08
57	ENSMUSG00000053930	Shisa6	-2.19781	3.42249e-10	8.15716e-08
58	ENSMUSG00000061742	Slc22a12	-2.28022	3.45769e-10	8.15716e-08
59	ENSMUSG00000047242	Taf9b	0.662239	4.5044e-10	1.04464e-07
60	ENSMUSG00000018398	Septin8	0.674479	4.76877e-10	1.08752e-07
61	ENSMUSG00000055322	Tns1	0.442194	5.23812e-10	1.15658e-07
62	ENSMUSG00000034343	Ube2f	-0.446531	5.24068e-10	1.15658e-07
63	ENSMUSG00000024712	Rfk	-0.592711	6.12118e-10	1.32946e-07
64	ENSMUSG00000041734	Kirrel	1.2783	6.50525e-10	1.3908e-07
65	ENSMUSG00000039323	Igfbp2	5.49381	9.17427e-10	1.93126e-07
66	ENSMUSG00000026223	Itm2c	0.389349	1.51829e-09	3.13559e-07
67	ENSMUSG00000063856	Gpx1	-0.66686	1.53537e-09	3.13559e-07
68	ENSMUSG00000035828	Pim3	1.22624	1.77494e-09	3.51978e-07
69	ENSMUSG00000028809	Srrm1	0.443367	1.75741e-09	3.51978e-07
70	ENSMUSG00000057614	Gnai1	1.09726	1.80863e-09	3.53536e-07
71	ENSMUSG00000020467	Efemp1	0.844514	2.00374e-09	3.86158e-07
72	ENSMUSG00000033377	Palmd	0.746575	2.03841e-09	3.87383e-07
73	ENSMUSG00000044674	Fzd1	1.23348	2.42459e-09	4.5446e-07
74	ENSMUSG00000041423	Paqr6	1.61303	2.48692e-09	4.59844e-07
75	ENSMUSG00000030244	Gys2	-2.20479	2.68344e-09	4.89566e-07
76	ENSMUSG00000038375	Trp53inp2	-0.687531	2.98057e-09	5.36621e-07
77	ENSMUSG00000038301	Snx10	-0.938371	3.38939e-09	5.94576e-07
78	ENSMUSG00000073433	Arhgdig	-2.01913	3.38159e-09	5.94576e-07
79	ENSMUSG00000027978	Prss12	1.2703	3.44933e-09	5.97432e-07
80	ENSMUSG00000054199	Gon4l	0.239911	4.60163e-09	7.87051e-07
81	ENSMUSG00000038286	Bphl	-0.579915	4.69738e-09	7.9351e-07
82	ENSMUSG00000029499	Pxmp2	1.18228	4.76812e-09	7.95636e-07
83	ENSMUSG00000096887	Gm20594	-1.47921	5.04894e-09	8.32344e-07
84	ENSMUSG00000028910	Mecr	-0.827576	5.31391e-09	8.64041e-07
85	ENSMUSG00000045102	Poln	-2.1596	5.3675e-09	8.64041e-07
86	ENSMUSG00000001642	Akr1b3	-0.491274	5.56634e-09	8.85631e-07
87	ENSMUSG00000024370	Cdc23	0.291544	6.58048e-09	1.03495e-06
88	ENSMUSG00000062070	Pgk1	-0.495405	7.09905e-09	1.10382e-06
89	ENSMUSG00000118669	Arvcf	0.858161	7.87529e-09	1.21076e-06
90	ENSMUSG00000038618	Rassf7	1.21911	8.05106e-09	1.22403e-06
91	ENSMUSG00000034209	Rasl10a	-2.21149	8.84686e-09	1.33024e-06
92	ENSMUSG00000025815	Dhtkd1	0.838281	9.17876e-09	1.33966e-06
93	ENSMUSG00000027412	Lpin3	-0.951952	9.20323e-09	1.33966e-06
94	ENSMUSG00000015090	Ptgds	-3.0796	9.073e-09	1.33966e-06
95	ENSMUSG00000022756	Slc7a4	1.76842	9.77901e-09	1.40849e-06
96	ENSMUSG00000070509	Rgma	0.723501	1.09439e-08	1.54377e-06
97	ENSMUSG00000042608	Stk40	-0.427039	1.09314e-08	1.54377e-06
98	ENSMUSG00000079658	Eloc	-0.417513	1.16676e-08	1.62906e-06
99	ENSMUSG00000027901	Dennd2d	1.56823	1.18118e-08	1.63253e-06
100	ENSMUSG00000031357	Syap1	0.368391	1.30276e-08	1.78257e-06
101	ENSMUSG00000019810	Fuca2	0.631194	1.31683e-08	1.78398e-06
102	ENSMUSG00000029093	Sorcs2	1.78591	1.38208e-08	1.85401e-06
103	ENSMUSG00000034932	Mrpl54	-0.42619	1.40185e-08	1.86228e-06
104	ENSMUSG00000029066	Mrpl20	-0.733883	1.65091e-08	2.17206e-06
105	ENSMUSG00000020009	Ifngr1	0.542361	1.67567e-08	2.18364e-06
106	ENSMUSG00000096188	Cmtm4	-0.475762	1.77865e-08	2.29597e-06
107	ENSMUSG00000021403	Serpinb9b	3.80885	1.86551e-08	2.38558e-06
108	ENSMUSG00000024535	Snx24	-0.811707	1.97735e-08	2.5052e-06
109	ENSMUSG00000037362	Ccn3	2.06416	2.46783e-08	3.06017e-06
110	ENSMUSG00000039137	Whrn	0.818804	2.4457e-08	3.06017e-06
111	ENSMUSG00000020263	Appl2	0.391948	2.48249e-08	3.06017e-06
112	ENSMUSG00000052676	Zmat1	0.506287	2.61902e-08	3.19965e-06
113	ENSMUSG00000032802	Srxn1	-0.783134	2.8084e-08	3.40065e-06
114	ENSMUSG00000019179	Mdh2	-0.592969	3.00901e-08	3.5802e-06
115	ENSMUSG00000046167	Gldn	-2.53775	2.98447e-08	3.5802e-06
116	ENSMUSG00000067786	Nnat	1.56055	3.04445e-08	3.59114e-06
117	ENSMUSG00000018339	Gpx3	0.93867	3.18008e-08	3.71906e-06
118	ENSMUSG00000021277	Traf3	-0.439463	3.24974e-08	3.76832e-06
119	ENSMUSG00000047617	Paxx	-1.15002	3.4428e-08	3.95864e-06
120	ENSMUSG00000022340	Sybu	1.29961	3.79402e-08	4.29038e-06
121	ENSMUSG00000024526	Cidea	-0.878549	3.77867e-08	4.29038e-06
122	ENSMUSG00000029017	Pmpcb	-0.542978	4.02527e-08	4.47787e-06
123	ENSMUSG00000035186	Ubd	-2.40473	4.00264e-08	4.47787e-06
124	ENSMUSG00000028553	Angptl3	-1.75729	4.78451e-08	5.27956e-06
125	ENSMUSG00000018537	Pcgf2	0.528557	4.85234e-08	5.31156e-06
126	ENSMUSG00000055235	Wdr86	1.62759	5.61967e-08	6.05465e-06
127	ENSMUSG00000078532	Nkain1	-0.811306	5.61179e-08	6.05465e-06
128	ENSMUSG00000033768	Nrxn2	-1.44001	5.72304e-08	6.11784e-06
129	ENSMUSG00000054150	Syne3	1.12611	6.10945e-08	6.48028e-06
130	ENSMUSG00000059248	Septin9	-0.451572	6.43244e-08	6.77039e-06
131	ENSMUSG00000020566	Atp6v1c2	-1.31835	6.62045e-08	6.91508e-06
132	ENSMUSG00000051550	Zfp579	0.543546	6.74647e-08	6.99333e-06
133	ENSMUSG00000032518	Rpsa	0.480062	6.81975e-08	7.01613e-06
134	ENSMUSG00000056167	Cnot10	0.341091	6.96263e-08	7.10968e-06
135	ENSMUSG00000066607	Insyn1	-1.08005	7.57273e-08	7.65816e-06
136	ENSMUSG00000031779	Ccl22	-1.98064	7.61171e-08	7.65816e-06
137	ENSMUSG00000040563	Plppr2	0.54719	8.31151e-08	8.30119e-06
138	ENSMUSG00000046808	Atp10d	1.23315	8.96737e-08	8.82738e-06
139	ENSMUSG00000027523	Gnas	-0.596213	8.92619e-08	8.82738e-06
140	ENSMUSG00000023960	Enpp5	0.507132	9.06799e-08	8.86266e-06
141	ENSMUSG00000073968	Trim68	0.742612	9.38687e-08	9.10926e-06
142	ENSMUSG00000039195	Bbln	-1.08526	9.67719e-08	9.32486e-06
143	ENSMUSG00000075703	Selenoi	0.466255	1.06922e-07	1.02309e-05
144	ENSMUSG00000028776	Tinagl1	1.00905	1.15092e-07	1.09361e-05
145	ENSMUSG00000030309	Caprin2	0.562663	1.22799e-07	1.1588e-05
146	ENSMUSG00000001228	Uhrf1	-0.979448	1.28669e-07	1.20588e-05
147	ENSMUSG00000033361	Prrg3	0.475814	1.33038e-07	1.23834e-05
148	ENSMUSG00000028538	St3gal3	-0.481599	1.44591e-07	1.33678e-05
149	ENSMUSG00000028164	Manba	0.523684	1.51652e-07	1.39265e-05
150	ENSMUSG00000023861	Mpc1	-0.840174	1.56213e-07	1.42497e-05
151	ENSMUSG00000049940	Pgrmc2	0.410765	1.59594e-07	1.44618e-05
152	ENSMUSG00000039831	Arhgap29	0.480779	1.61043e-07	1.4497e-05
153	ENSMUSG00000069805	Fbp1	2.02791	1.63156e-07	1.45913e-05
154	ENSMUSG00000036611	Eepd1	1.00278	1.77982e-07	1.58139e-05
155	ENSMUSG00000048012	Zfp473	-0.917713	1.87441e-07	1.65468e-05
156	ENSMUSG00000040532	Abhd11	-0.479856	1.88662e-07	1.65478e-05
157	ENSMUSG00000022878	Adipoq	0.528382	2.04225e-07	1.76862e-05
158	ENSMUSG00000058056	Palld	-0.824581	2.03163e-07	1.76862e-05
159	ENSMUSG00000053194	Cib4	2.21274	2.129e-07	1.83214e-05
160	ENSMUSG00000052926	Rnaseh2a	0.695002	2.16053e-07	1.84766e-05
161	ENSMUSG00000029470	P2rx4	0.356223	2.44844e-07	2.06803e-05
162	ENSMUSG00000027198	Ext2	0.286018	2.43497e-07	2.06803e-05
163	ENSMUSG00000034006	Slc66a2	1.05765	2.49868e-07	2.09751e-05
164	ENSMUSG00000026676	Ccdc3	-0.70969	2.68721e-07	2.24202e-05
165	ENSMUSG00000047675	Rps8	0.58271	2.80872e-07	2.3292e-05
166	ENSMUSG00000021066	Atl1	0.857335	2.84878e-07	2.34819e-05
167	ENSMUSG00000053175	Bcl3	-0.956668	2.88325e-07	2.36237e-05
168	ENSMUSG00000041453	Rpl21	0.521275	2.97922e-07	2.42116e-05
169	ENSMUSG00000026028	Trak2	-0.633726	2.99039e-07	2.42116e-05
170	ENSMUSG00000031996	Aplp2	0.445537	3.4906e-07	2.80052e-05
171	ENSMUSG00000031134	Rbmx	0.434188	3.49988e-07	2.80052e-05
172	ENSMUSG00000035901	Dennd5a	-0.363666	3.7312e-07	2.96826e-05
173	ENSMUSG00000048100	Taf13	-0.469758	3.79796e-07	2.98664e-05
174	ENSMUSG00000025059	Gk	-1.16621	3.79097e-07	2.98664e-05
175	ENSMUSG00000039556	Ppp1r3f	0.61275	3.85336e-07	3.01289e-05
176	ENSMUSG00000061787	Rps17	0.486237	3.94332e-07	3.06571e-05
177	ENSMUSG00000034981	Parm1	-0.904598	4.02497e-07	3.1115e-05
178	ENSMUSG00000025795	Rassf3	-0.363672	4.09846e-07	3.15052e-05
179	ENSMUSG00000032064	Dixdc1	0.869168	4.17071e-07	3.15298e-05
180	ENSMUSG00000030917	Tmem159	0.818597	4.17079e-07	3.15298e-05
181	ENSMUSG00000037971	1110032A03Rik	-0.513606	4.13331e-07	3.15298e-05
182	ENSMUSG00000020142	Slc1a4	1.2713	4.31219e-07	3.24196e-05
183	ENSMUSG00000060981	H4c8	-1.42178	4.4179e-07	3.30328e-05
184	ENSMUSG00000014633	Cmc2	-0.671019	4.45863e-07	3.31562e-05
185	ENSMUSG00000041028	Ghitm	-0.566926	4.49654e-07	3.32574e-05
186	ENSMUSG00000055980	Irs1	1.1402	4.53729e-07	3.33784e-05
187	ENSMUSG00000042569	Dhrs7b	-0.588191	4.56755e-07	3.34213e-05
188	ENSMUSG00000037625	Cldn11	4.32851	4.65695e-07	3.38942e-05
189	ENSMUSG00000019768	Esr1	1.78239	4.68988e-07	3.39532e-05
190	ENSMUSG00000067924	Rtl8b	0.586632	4.77778e-07	3.42274e-05
191	ENSMUSG00000000738	Spg7	-0.563138	4.77024e-07	3.42274e-05
192	ENSMUSG00000025525	Apool	-0.527264	4.99916e-07	3.56269e-05
193	ENSMUSG00000026526	Fh1	-0.652142	5.11979e-07	3.62974e-05
194	ENSMUSG00000028601	Echdc2	0.474203	5.23032e-07	3.67583e-05
195	ENSMUSG00000029545	Acads	-0.721833	5.23852e-07	3.67583e-05
196	ENSMUSG00000037353	Letmd1	-0.832238	5.66238e-07	3.95298e-05
197	ENSMUSG00000050052	Tdrp	0.704858	5.73521e-07	3.9835e-05
198	ENSMUSG00000003680	Taf6l	-0.861128	5.81473e-07	4.01833e-05
199	ENSMUSG00000070047	Fat1	0.403996	5.85398e-07	4.02512e-05
200	ENSMUSG00000032911	Cspg4	-1.12282	6.18553e-07	4.23183e-05
201	ENSMUSG00000025545	Clybl	-0.538308	6.48192e-07	4.41254e-05
202	ENSMUSG00000016541	Atxn10	0.406369	6.70333e-07	4.54068e-05
203	ENSMUSG00000061758	Akr1b10	-0.666664	6.75111e-07	4.55052e-05
204	ENSMUSG00000042851	Zc3h6	1.29275	6.85376e-07	4.58969e-05
205	ENSMUSG00000023094	Msrb2	-0.780858	6.87631e-07	4.58969e-05
206	ENSMUSG00000033712	Ccar2	0.311518	7.14032e-07	4.74276e-05
207	ENSMUSG00000045730	Adrb2	1.87865	7.18252e-07	4.74775e-05
208	ENSMUSG00000032609	Klhdc8b	0.69319	8.28936e-07	5.42696e-05
209	ENSMUSG00000045350	Fam186a	-1.3141	8.28504e-07	5.42696e-05
210	ENSMUSG00000031283	Chrdl1	1.49391	8.8706e-07	5.77983e-05
211	ENSMUSG00000048327	Ckap2l	-1.32838	9.29402e-07	6.02702e-05
212	ENSMUSG00000004394	Tmed4	0.291139	9.459e-07	6.10507e-05
213	ENSMUSG00000003518	Dusp3	-0.403384	9.88575e-07	6.35055e-05
214	ENSMUSG00000051154	Commd3	-0.31541	1.05482e-06	6.71401e-05
215	ENSMUSG00000022401	Xpnpep3	-0.47176	1.05497e-06	6.71401e-05
216	ENSMUSG00000027677	Ttc14	0.380064	1.06717e-06	6.76022e-05
217	ENSMUSG00000023911	Flywch2	1.34175	1.09788e-06	6.87438e-05
218	ENSMUSG00000006931	P3h4	0.567816	1.10026e-06	6.87438e-05
219	ENSMUSG00000031207	Msn	-0.483223	1.0926e-06	6.87438e-05
220	ENSMUSG00000029638	Glcci1	1.00642	1.11081e-06	6.90872e-05
221	ENSMUSG00000061032	Rrp1	0.339471	1.11759e-06	6.91945e-05
222	ENSMUSG00000025511	Tspan4	1.04577	1.13397e-06	6.98657e-05
223	ENSMUSG00000024120	Lrpprc	-0.459449	1.13864e-06	6.98657e-05
224	ENSMUSG00000032026	Rexo2	-0.288789	1.15613e-06	7.06219e-05
225	ENSMUSG00000061718	Ppp1r1b	3.10215	1.22187e-06	7.43057e-05
226	ENSMUSG00000036580	Spg20	0.644177	1.25065e-06	7.55607e-05
227	ENSMUSG00000025575	Cant1	0.459715	1.25355e-06	7.55607e-05
228	ENSMUSG00000034848	Ttc21b	0.426554	1.29336e-06	7.76188e-05
229	ENSMUSG00000024188	Luc7l	0.4699	1.325e-06	7.91702e-05
230	ENSMUSG00000026944	Abca2	-0.757896	1.3345e-06	7.93911e-05
231	ENSMUSG00000038615	Nfe2l1	-0.262222	1.34096e-06	7.94301e-05
232	ENSMUSG00000031613	Hpgd	1.09849	1.36326e-06	8.04032e-05
233	ENSMUSG00000025488	Cox8b	-1.34293	1.4931e-06	8.76826e-05
234	ENSMUSG00000033545	Znrf1	-0.461957	1.5861e-06	9.27459e-05
235	ENSMUSG00000006356	Crip2	0.820847	1.65937e-06	9.66177e-05
236	ENSMUSG00000023951	Vegfa	0.626866	1.68825e-06	9.78824e-05
237	ENSMUSG00000021765	Fst	1.06635	1.70007e-06	9.79931e-05
238	ENSMUSG00000047215	Rpl9	0.566116	1.70448e-06	9.79931e-05
239	ENSMUSG00000031360	Ctps2	0.393258	1.75302e-06	0.000100362
240	ENSMUSG00000030826	Bcat2	0.652451	1.77139e-06	0.000100572
241	ENSMUSG00000056121	Fez2	-0.314998	1.76753e-06	0.000100572
242	ENSMUSG00000073702	Rpl31	0.493339	1.85225e-06	0.000103999
243	ENSMUSG00000027195	Hsd17b12	-0.765328	1.85454e-06	0.000103999
244	ENSMUSG00000045534	Kcna5	-0.804052	1.84535e-06	0.000103999
245	ENSMUSG00000027875	Hmgcs2	3.07115	1.98397e-06	0.000110803
246	ENSMUSG00000032050	Rdx	0.339816	2.01157e-06	0.000111888
247	ENSMUSG00000055239	Kcmf1	-0.394189	2.0417e-06	0.000112706
248	ENSMUSG00000061130	Ppm1b	-0.401636	2.04277e-06	0.000112706
249	ENSMUSG00000070372	Capza1	-0.22273	2.06818e-06	0.00011365
250	ENSMUSG00000003949	Hlf	-0.851806	2.08323e-06	0.000114019
251	ENSMUSG00000074971	Fibin	0.817367	2.11341e-06	0.00011521
252	ENSMUSG00000000934	Top1mt	-0.536017	2.12321e-06	0.000115285
253	ENSMUSG00000019960	Dusp6	-0.814863	2.20433e-06	0.000119217
254	ENSMUSG00000021982	Cdadc1	-0.413162	2.23606e-06	0.000119984
255	ENSMUSG00000019990	Pde7b	-0.857766	2.22879e-06	0.000119984
256	ENSMUSG00000032387	Rbpms2	-0.564354	2.25092e-06	0.00012031
257	ENSMUSG00000038776	Ephx1	0.416611	2.28065e-06	0.000120954
258	ENSMUSG00000027637	Rab5if	-0.441135	2.27967e-06	0.000120954
259	ENSMUSG00000026023	Cdk15	1.9904	2.36428e-06	0.000124905
260	ENSMUSG00000021215	Net1	1.00362	2.4417e-06	0.000128499
261	ENSMUSG00000058558	Rpl5	0.535188	2.48916e-06	0.000130495
262	ENSMUSG00000035967	Ints6l	0.444997	2.63263e-06	0.000137489
263	ENSMUSG00000028557	Rnf11	-0.344878	2.64581e-06	0.000137652
264	ENSMUSG00000062997	Rpl35	0.45262	2.66865e-06	0.000138315
265	ENSMUSG00000045216	Hs6st1	0.53873	2.74869e-06	0.000141414
266	ENSMUSG00000070730	Rmdn3	-0.617391	2.74911e-06	0.000141414
267	ENSMUSG00000027276	Jag1	0.521374	2.79482e-06	0.000143227
268	ENSMUSG00000031634	Ufsp2	-0.423834	2.83656e-06	0.000144823
269	ENSMUSG00000026639	Lamb3	-0.722529	2.88383e-06	0.000146689
270	ENSMUSG00000027007	Itprid2	-0.4209	2.94723e-06	0.000148808
271	ENSMUSG00000031987	Egln1	-0.488298	2.94664e-06	0.000148808
272	ENSMUSG00000043542	Zc2hc1a	0.65748	3.05442e-06	0.00015309
273	ENSMUSG00000037216	Lipt1	-0.550591	3.05365e-06	0.00015309
274	ENSMUSG00000049307	Fut4	-0.966194	3.10976e-06	0.000155295
275	ENSMUSG00000024219	Anks1	0.478857	3.1743e-06	0.000157941
276	ENSMUSG00000021866	Anxa11	0.337566	3.1954e-06	0.000158415
277	ENSMUSG00000017607	Tns4	1.49331	3.30589e-06	0.000160977
278	ENSMUSG00000028081	Rps3a1	0.54289	3.29442e-06	0.000160977
279	ENSMUSG00000020393	Kremen1	0.378053	3.28774e-06	0.000160977
280	ENSMUSG00000016344	Ppdpf	-0.424921	3.29784e-06	0.000160977
281	ENSMUSG00000026260	Ndufa10	-0.571836	3.27783e-06	0.000160977
282	ENSMUSG00000006373	Pgrmc1	0.382188	3.40648e-06	0.000165287
283	ENSMUSG00000056216	Cebpg	-0.391282	3.457e-06	0.000167145
284	ENSMUSG00000045193	Cirbp	0.821133	3.49105e-06	0.000168197
285	ENSMUSG00000037410	Tbc1d2b	0.356446	3.53321e-06	0.000169038
286	ENSMUSG00000029090	Adgra3	-0.337957	3.52646e-06	0.000169038
287	ENSMUSG00000026096	Osgepl1	-0.454831	3.66215e-06	0.000174596
288	ENSMUSG00000030270	Cpne9	1.62616	3.8154e-06	0.000180644
289	ENSMUSG00000028284	Map3k7	-0.229676	3.80447e-06	0.000180644
290	ENSMUSG00000055128	Cgrrf1	-0.370707	3.86277e-06	0.000182256
291	ENSMUSG00000046844	Vat1l	1.09894	4.01381e-06	0.000188483
292	ENSMUSG00000062210	Tnfaip8	0.386896	4.02229e-06	0.000188483
293	ENSMUSG00000060938	Rpl26	0.537534	4.16757e-06	0.000194624
294	ENSMUSG00000017144	Rnd3	0.833564	4.19237e-06	0.000195116
295	ENSMUSG00000049676	Catsperg1	0.875449	4.23235e-06	0.000196309
296	ENSMUSG00000028654	Mycl	1.31382	4.32536e-06	0.000199404
297	ENSMUSG00000037933	Bicd2	-0.436137	4.32822e-06	0.000199404
298	ENSMUSG00000028757	Ddost	0.32237	4.40626e-06	0.000202318
299	ENSMUSG00000006782	Cnp	0.904276	4.43983e-06	0.000203178
300	ENSMUSG00000027634	Ndrg3	-0.491887	4.4724e-06	0.000203986
301	ENSMUSG00000036225	Kctd1	-0.530988	4.58752e-06	0.000208542
302	ENSMUSG00000032177	Pde4a	-0.700512	4.6106e-06	0.000208897
303	ENSMUSG00000028149	Rap1gds1	-0.360769	4.68746e-06	0.000211678
304	ENSMUSG00000031209	Heph	0.678794	4.72807e-06	0.000211821
305	ENSMUSG00000028495	Rps6	0.628375	4.73706e-06	0.000211821
306	ENSMUSG00000064360	mt-Nd3	-0.765417	4.71014e-06	0.000211821
307	ENSMUSG00000079685	Ulbp1	-0.82523	4.7674e-06	0.000212483
308	ENSMUSG00000052146	Rps10	0.468418	4.80252e-06	0.000212663
309	ENSMUSG00000001131	Timp1	-1.50363	4.79221e-06	0.000212663
310	ENSMUSG00000061477	Rps7	0.587543	5.06985e-06	0.000223057
311	ENSMUSG00000046364	Rpl27a	0.571522	5.06018e-06	0.000223057
312	ENSMUSG00000025289	Prdx4	0.445066	5.22728e-06	0.000228514
313	ENSMUSG00000037916	Ndufv1	-0.646191	5.21117e-06	0.000228514
314	ENSMUSG00000028465	Tln1	0.42765	5.24615e-06	0.000228609
315	ENSMUSG00000029797	Sspo	1.26808	5.3389e-06	0.000231912
316	ENSMUSG00000028261	Ndufaf4	-0.582256	5.42121e-06	0.000234742
317	ENSMUSG00000104951	Gm43413	1.12821	5.59817e-06	0.000240125
318	ENSMUSG00000040462	Os9	0.299757	5.59208e-06	0.000240125
319	ENSMUSG00000034190	Chmp7	-0.256201	5.58459e-06	0.000240125
320	ENSMUSG00000022788	Fgd4	-0.720346	5.69285e-06	0.000243423
321	ENSMUSG00000024935	Slc1a1	-1.25282	5.83964e-06	0.000248921
322	ENSMUSG00000026021	Sumo1	-0.354918	6.02541e-06	0.000255333
323	ENSMUSG00000014776	Nol3	-0.762464	6.02738e-06	0.000255333
324	ENSMUSG00000031553	Adam3	2.21011	6.06694e-06	0.000255428
325	ENSMUSG00000031351	Zfp185	1.063	6.05038e-06	0.000255428
326	ENSMUSG00000067787	Blcap	0.447011	6.12177e-06	0.000256494
327	ENSMUSG00000032309	Fbxo22	0.415823	6.12977e-06	0.000256494
328	ENSMUSG00000057716	Tmem178b	-0.841222	6.20631e-06	0.000258905
329	ENSMUSG00000026723	Trdmt1	0.781608	6.39307e-06	0.000265631
330	ENSMUSG00000041577	Prelp	0.502285	6.42577e-06	0.000265631
331	ENSMUSG00000036002	Fam214b	-0.381546	6.40787e-06	0.000265631
332	ENSMUSG00000038167	Plekhg6	1.39716	6.66299e-06	0.000274607
333	ENSMUSG00000058704	Memo1	-0.547215	6.73176e-06	0.000276609
334	ENSMUSG00000034751	Mast4	-0.460228	6.85128e-06	0.000280677
335	ENSMUSG00000026185	Igfbp5	0.83325	6.98584e-06	0.000285335
336	ENSMUSG00000042770	Hebp1	0.483705	7.10923e-06	0.000288651
337	ENSMUSG00000051627	H1f4	-1.63531	7.10224e-06	0.000288651
338	ENSMUSG00000037086	Prr32	-1.37284	7.22515e-06	0.00029249
339	ENSMUSG00000025466	Fuom	-0.412162	7.27469e-06	0.000293627
340	ENSMUSG00000028494	Plin2	-0.852602	7.52276e-06	0.000302747
341	ENSMUSG00000015165	Hnrnpl	0.419697	7.55472e-06	0.000303142
342	ENSMUSG00000017446	C1qtnf1	0.707303	7.64919e-06	0.000306035
343	ENSMUSG00000006764	Tph2	-3.49923	7.73187e-06	0.000308441
344	ENSMUSG00000057841	Rpl32	0.470078	7.80296e-06	0.000309501
345	ENSMUSG00000032733	Snx33	0.386263	7.80369e-06	0.000309501
346	ENSMUSG00000030802	Bckdk	-0.432955	8.00792e-06	0.000316683
347	ENSMUSG00000023942	Slc29a1	-0.817899	8.31752e-06	0.000327979
348	ENSMUSG00000026755	Arpc5l	-0.389792	8.49138e-06	0.000333872
349	ENSMUSG00000016257	Prelid3b	-0.58585	8.53772e-06	0.000334732
350	ENSMUSG00000008683	Rps15a	0.460563	8.57644e-06	0.00033529
351	ENSMUSG00000015966	Il17rb	0.927253	8.77803e-06	0.000342193
352	ENSMUSG00000024331	Dsc2	1.64889	9.35373e-06	0.000363599
353	ENSMUSG00000067377	Tspan6	-0.53724	9.5398e-06	0.000369782
354	ENSMUSG00000026811	St6galnac6	-0.565515	9.64292e-06	0.000372723
355	ENSMUSG00000020766	Galk1	0.482562	9.73519e-06	0.00037523
356	ENSMUSG00000054474	Thnsl2	0.609503	9.77233e-06	0.000375604
357	ENSMUSG00000023074	Mospd1	0.533159	9.84684e-06	0.000377407
358	ENSMUSG00000037697	Ddhd1	0.453614	1.00701e-05	0.000382948
359	ENSMUSG00000028854	Slc9a1	0.315627	1.0029e-05	0.000382948
360	ENSMUSG00000021993	Mipep	-0.387406	1.00754e-05	0.000382948
361	ENSMUSG00000020015	Cdk17	-0.388701	1.02134e-05	0.000387118
362	ENSMUSG00000005125	Ndrg1	1.00578	1.03371e-05	0.000390726
363	ENSMUSG00000064037	Gpn1	0.242925	1.06533e-05	0.000401569
364	ENSMUSG00000057098	Ebf1	0.443076	1.09414e-05	0.000411295
365	ENSMUSG00000001761	Smo	0.758099	1.11401e-05	0.000417618
366	ENSMUSG00000031320	Rps4x	0.563341	1.12979e-05	0.000421582
367	ENSMUSG00000023019	Gpd1	-0.658599	1.13075e-05	0.000421582
368	ENSMUSG00000107838	Gm45769	-1.12493	1.13606e-05	0.000422412
369	ENSMUSG00000032245	Cln6	0.524897	1.14084e-05	0.000423038
370	ENSMUSG00000052336	Cx3cr1	0.749523	1.15477e-05	0.000427047
371	ENSMUSG00000001134	Uxt	-0.385485	1.16446e-05	0.000429468
372	ENSMUSG00000046056	Sbsn	0.867771	1.1758e-05	0.000430172
373	ENSMUSG00000032849	Abcc4	-0.544758	1.1755e-05	0.000430172
374	ENSMUSG00000045136	Tubb2b	-0.971001	1.17389e-05	0.000430172
375	ENSMUSG00000023175	Bsg	0.613735	1.18937e-05	0.000433979
376	ENSMUSG00000071415	Rpl23	0.561447	1.20399e-05	0.000438143
377	ENSMUSG00000024725	Ostf1	-0.235806	1.22238e-05	0.000443657
378	ENSMUSG00000071644	Eef1g	0.367266	1.23476e-05	0.000446963
379	ENSMUSG00000064345	mt-Nd2	-0.628577	1.25604e-05	0.000453467
380	ENSMUSG00000037010	Apln	-1.4242	1.28238e-05	0.000461758
381	ENSMUSG00000025178	Pi4k2a	0.292031	1.29248e-05	0.000464174
382	ENSMUSG00000027881	Prpf38b	0.330301	1.35028e-05	0.000483662
383	ENSMUSG00000028568	Btf3l4	-0.485041	1.37525e-05	0.000491318
384	ENSMUSG00000026187	Xrcc5	0.629807	1.38314e-05	0.000492853
385	ENSMUSG00000069833	Ahnak	0.499357	1.38731e-05	0.000493054
386	ENSMUSG00000021589	Rhobtb3	0.770695	1.40779e-05	0.000499036
387	ENSMUSG00000001576	Ergic1	-0.772584	1.41538e-05	0.00049914
388	ENSMUSG00000108286	Gm44224	-1.50653	1.41332e-05	0.00049914
389	ENSMUSG00000030268	Bcat1	1.31516	1.44939e-05	0.000507842
390	ENSMUSG00000028700	Pomgnt1	-0.337241	1.45119e-05	0.000507842
391	ENSMUSG00000027068	Dhrs9	-2.56107	1.44732e-05	0.000507842
392	ENSMUSG00000045763	Basp1	1.04605	1.45862e-05	0.00050914
393	ENSMUSG00000032383	Ppib	0.197175	1.46708e-05	0.000509493
394	ENSMUSG00000026981	Il1rn	-1.49012	1.46367e-05	0.000509493
395	ENSMUSG00000036062	Phf24	1.26416	1.48099e-05	0.00051242
396	ENSMUSG00000026594	Ralgps2	-0.721705	1.483e-05	0.00051242
397	ENSMUSG00000054723	Vmac	0.436497	1.5013e-05	0.000516137
398	ENSMUSG00000060923	Acyp2	-0.722398	1.50125e-05	0.000516137
399	ENSMUSG00000021286	Zfyve21	0.529019	1.52923e-05	0.000523112
400	ENSMUSG00000018983	E2f2	-1.40418	1.52797e-05	0.000523112
401	ENSMUSG00000045973	Slc25a51	-0.56243	1.54415e-05	0.000526897
402	ENSMUSG00000044786	Zfp36	0.968039	1.55237e-05	0.000527072
403	ENSMUSG00000034345	Gtf2h5	-0.268671	1.55187e-05	0.000527072
404	ENSMUSG00000024197	Plin3	-0.617418	1.56246e-05	0.000529188
405	ENSMUSG00000036845	Lin37	-0.412829	1.5774e-05	0.000532927
406	ENSMUSG00000036181	H1f2	-1.02689	1.58735e-05	0.000534968
407	ENSMUSG00000024114	Prss41	1.43808	1.59895e-05	0.000537553
408	ENSMUSG00000034659	Tmem109	0.311506	1.64132e-05	0.000550445
409	ENSMUSG00000045294	Insig1	-0.623055	1.64876e-05	0.000551588
410	ENSMUSG00000030214	Plbd1	-0.531908	1.6819e-05	0.000561304
411	ENSMUSG00000060739	Nsa2	0.436946	1.72981e-05	0.000575886
412	ENSMUSG00000046434	Hnrnpa1	0.63727	1.83708e-05	0.000605706
413	ENSMUSG00000017802	Retreg3	-0.269894	1.83533e-05	0.000605706
414	ENSMUSG00000026335	Pam	-0.417385	1.82419e-05	0.000605706
415	ENSMUSG00000045620	Odf3l1	-1.74688	1.83618e-05	0.000605706
416	ENSMUSG00000028636	Ppcs	-0.551852	1.84565e-05	0.000607069
417	ENSMUSG00000002578	Ikzf4	1.75624	1.86231e-05	0.000608323
418	ENSMUSG00000008668	Rps18	0.57008	1.86234e-05	0.000608323
419	ENSMUSG00000017386	Traf4	-0.84039	1.8628e-05	0.000608323
420	ENSMUSG00000085795	Zfp703	0.689333	1.89584e-05	0.000612917
421	ENSMUSG00000027858	Tspan2	-0.470965	1.89927e-05	0.000612917
422	ENSMUSG00000045160	Bola3	-0.555418	1.88981e-05	0.000612917
423	ENSMUSG00000107881	Gm44250	-0.637958	1.89085e-05	0.000612917
424	ENSMUSG00000030483	Cyp2b10	-2.22434	1.88577e-05	0.000612917
425	ENSMUSG00000028982	Slc25a33	-0.656861	1.94808e-05	0.00062719
426	ENSMUSG00000027358	Bmp2	0.71331	1.95835e-05	0.000629016
427	ENSMUSG00000002015	Bcap31	-0.284211	2.00282e-05	0.000641765
428	ENSMUSG00000020774	Aspa	-0.575342	2.00742e-05	0.000641765
429	ENSMUSG00000018651	Tada2a	0.449463	2.04369e-05	0.000651452
430	ENSMUSG00000001289	Pfdn5	0.298283	2.04724e-05	0.000651452
431	ENSMUSG00000027447	Cst3	0.453593	2.10993e-05	0.000668291
432	ENSMUSG00000046516	Cox17	-0.481966	2.10841e-05	0.000668291
433	ENSMUSG00000028062	Lamtor2	-0.371771	2.11886e-05	0.000669571
434	ENSMUSG00000029076	Sdf4	0.257799	2.13022e-05	0.000671609
435	ENSMUSG00000021079	Timm9	-0.352613	2.14238e-05	0.000673888
436	ENSMUSG00000061983	Rps12	0.494484	2.15366e-05	0.000675883
437	ENSMUSG00000027274	Mkks	-0.577855	2.22711e-05	0.000697336
438	ENSMUSG00000042350	Arel1	-0.25273	2.28974e-05	0.000715307
439	ENSMUSG00000031667	Aktip	-0.319609	2.33749e-05	0.000728562
440	ENSMUSG00000089774	Slc5a3	0.623047	2.34995e-05	0.000730782
441	ENSMUSG00000106073	Gm42892	0.898507	2.40561e-05	0.000746395
442	ENSMUSG00000025220	Oga	-0.32372	2.41446e-05	0.000747446
443	ENSMUSG00000038503	Mesd	0.293486	2.43968e-05	0.000753546
444	ENSMUSG00000072969	Armcx5	0.528362	2.48561e-05	0.000766003
445	ENSMUSG00000053398	Phgdh	0.637266	2.49471e-05	0.00076708
446	ENSMUSG00000038970	Lmtk2	0.358839	2.50976e-05	0.000769979
447	ENSMUSG00000073139	Tmem185a	-0.302257	2.52024e-05	0.000771463
448	ENSMUSG00000030527	Crtc3	0.457775	2.6127e-05	0.000795757
449	ENSMUSG00000074884	Serf2	-0.187014	2.61705e-05	0.000795757
450	ENSMUSG00000040370	Etfrf1	-0.634287	2.61308e-05	0.000795757
451	ENSMUSG00000042761	Mrap2	-1.88014	2.62569e-05	0.000796614
452	ENSMUSG00000030744	Rps3	0.478849	2.65278e-05	0.000803054
453	ENSMUSG00000020186	Csrp2	-0.484582	2.73345e-05	0.000825646
454	ENSMUSG00000111394	Gm49759	-0.433861	2.84285e-05	0.000856799
455	ENSMUSG00000102997	Gm17244	1.72685	2.87183e-05	0.000858104
456	ENSMUSG00000056870	Gulp1	1.0287	2.87226e-05	0.000858104
457	ENSMUSG00000067235	H2-Q10	0.814037	2.87168e-05	0.000858104
458	ENSMUSG00000059291	Rpl11	0.314852	2.86863e-05	0.000858104
459	ENSMUSG00000027610	Gss	-0.285367	2.88208e-05	0.000859161
460	ENSMUSG00000064370	mt-Cytb	-0.773315	2.88978e-05	0.000859584
461	ENSMUSG00000068270	Shroom4	-0.410869	2.91554e-05	0.000865364
462	ENSMUSG00000021067	Sav1	0.420717	2.9586e-05	0.000876245
463	ENSMUSG00000061046	Haghl	0.707994	3.04498e-05	0.000897891
464	ENSMUSG00000021559	Dapk1	0.662321	3.05137e-05	0.000897891
465	ENSMUSG00000025355	Mmp19	-0.803438	3.03865e-05	0.000897891
466	ENSMUSG00000022210	Dhrs4	-0.365416	3.09489e-05	0.000906795
467	ENSMUSG00000005950	P2rx5	-0.658854	3.09466e-05	0.000906795
468	ENSMUSG00000038807	Rap1gap2	-0.582469	3.15309e-05	0.000921876
469	ENSMUSG00000060036	Rpl3	0.502711	3.16297e-05	0.000922792
470	ENSMUSG00000047246	H2bc6	-1.24602	3.20382e-05	0.000932721
471	ENSMUSG00000073563	Csnk1g3	-0.296855	3.21214e-05	0.000933159
472	ENSMUSG00000039168	Dap	-0.321457	3.29406e-05	0.00095493
473	ENSMUSG00000018102	H2bc4	-1.18296	3.31984e-05	0.000960368
474	ENSMUSG00000033216	Eefsec	0.424365	3.35667e-05	0.000968973
475	ENSMUSG00000068039	Tcp1	0.185217	3.369e-05	0.000968999
476	ENSMUSG00000021643	Serf1	-0.429536	3.37092e-05	0.000968999
477	ENSMUSG00000003161	Sri	0.39851	3.41535e-05	0.000979711
478	ENSMUSG00000057982	Zfp809	0.534991	3.46515e-05	0.000991916
479	ENSMUSG00000033540	Idua	0.389441	3.50759e-05	0.00100197
480	ENSMUSG00000039910	Cited2	1.09286	3.56369e-05	0.00101376
481	ENSMUSG00000024683	Mrpl16	-0.442241	3.56179e-05	0.00101376
482	ENSMUSG00000023034	Nr4a1	2.87864	3.5799e-05	0.00101626
483	ENSMUSG00000029614	Rpl6	0.405936	3.61862e-05	0.00102513
484	ENSMUSG00000038775	Vill	1.06649	3.67985e-05	0.00103889
485	ENSMUSG00000059060	Rad51b	-1.11144	3.68239e-05	0.00103889
486	ENSMUSG00000074129	Rpl13a	0.525525	3.75229e-05	0.00105643
487	ENSMUSG00000060636	Rpl35a	0.400389	3.89488e-05	0.00109432
488	ENSMUSG00000038623	Tm6sf1	-0.430712	3.91451e-05	0.00109759
489	ENSMUSG00000030614	Tmem126b	-0.357337	3.99089e-05	0.00111671
490	ENSMUSG00000032115	Hyou1	-0.265021	4.02736e-05	0.00112462
491	ENSMUSG00000060538	Tmem219	-0.377992	4.04462e-05	0.00112714
492	ENSMUSG00000031835	Mbtps1	-0.201748	4.14806e-05	0.00115362
493	ENSMUSG00000017390	Aldoc	1.51955	4.16539e-05	0.0011549
494	ENSMUSG00000063558	Aox1	-0.346115	4.16955e-05	0.0011549
495	ENSMUSG00000017167	Cntnap1	-0.648516	4.24332e-05	0.00117296
496	ENSMUSG00000027620	Rbm39	0.249921	4.26893e-05	0.00117766
497	ENSMUSG00000022472	Desi1	0.652746	4.28151e-05	0.00117875
498	ENSMUSG00000051811	Cox6b2	0.963784	4.29835e-05	0.00118101
499	ENSMUSG00000025290	Rps24	0.400147	4.34552e-05	0.00119158
500	ENSMUSG00000003970	Rpl8	0.448714	4.4023e-05	0.0011928
501	ENSMUSG00000018340	Anxa6	0.37107	4.36907e-05	0.0011928
502	ENSMUSG00000043467	Zbtb37	0.351317	4.38989e-05	0.0011928
503	ENSMUSG00000030780	Rusf1	0.262761	4.3972e-05	0.0011928
504	ENSMUSG00000040181	Fmo1	-0.667018	4.37628e-05	0.0011928
505	ENSMUSG00000027452	Acss1	-0.696038	4.38806e-05	0.0011928
506	ENSMUSG00000021835	Bmp4	1.20621	4.42021e-05	0.00119529
507	ENSMUSG00000054263	Lifr	0.41744	4.43939e-05	0.0011969
508	ENSMUSG00000024924	Vldlr	-0.632392	4.44365e-05	0.0011969
509	ENSMUSG00000032437	Stt3b	0.313495	4.5263e-05	0.00121438
510	ENSMUSG00000038780	Smurf1	0.200339	4.52624e-05	0.00121438
511	ENSMUSG00000037656	Slc20a2	0.639648	4.56815e-05	0.00122321
512	ENSMUSG00000035184	Fam124a	-1.04567	4.59739e-05	0.00122864
513	ENSMUSG00000097187	Gm19426	1.71767	4.61873e-05	0.00123193
514	ENSMUSG00000027478	Dnmt3b	0.641194	4.65001e-05	0.00123786
515	ENSMUSG00000025968	Ndufs1	-0.498989	4.66117e-05	0.00123842
516	ENSMUSG00000029772	Ahcyl2	0.355247	4.72311e-05	0.00125245
517	ENSMUSG00000038900	Rpl12	0.476628	4.75698e-05	0.00125899
518	ENSMUSG00000025351	Cd63	0.834028	4.78905e-05	0.00126503
519	ENSMUSG00000002010	Idh3g	-0.546259	4.80372e-05	0.00126646
520	ENSMUSG00000004558	Ndrg2	0.514261	4.8194e-05	0.00126815
521	ENSMUSG00000030850	Ate1	0.228299	5.00316e-05	0.00131398
522	ENSMUSG00000050312	Nsun3	-0.480811	5.04403e-05	0.00132217
523	ENSMUSG00000026827	Gpd2	-0.773018	5.06208e-05	0.00132437
524	ENSMUSG00000030688	Stard10	0.493623	5.0859e-05	0.00132553
525	ENSMUSG00000072704	Smim10l1	-0.587179	5.08086e-05	0.00132553
526	ENSMUSG00000034192	Lsm3	0.500653	5.19568e-05	0.001349
527	ENSMUSG00000002249	Tead3	0.421392	5.19425e-05	0.001349
528	ENSMUSG00000028179	Cth	0.648963	5.24187e-05	0.00135587
529	ENSMUSG00000030884	Uqcrc2	-0.421741	5.25184e-05	0.00135587
530	ENSMUSG00000022425	Enpp2	-0.805086	5.24437e-05	0.00135587
531	ENSMUSG00000006127	Inpp5k	0.558286	5.31673e-05	0.00137003
532	ENSMUSG00000021981	Cab39l	-0.408712	5.33776e-05	0.00137287
533	ENSMUSG00000025616	Usp16	-0.375608	5.35713e-05	0.00137397
534	ENSMUSG00000022537	Tmem44	-0.38229	5.36212e-05	0.00137397
535	ENSMUSG00000059669	Taf1b	0.394255	5.39984e-05	0.00137847
536	ENSMUSG00000001016	Ilf2	0.3479	5.3948e-05	0.00137847
537	ENSMUSG00000020492	Ska2	0.508955	5.4635e-05	0.00139212
538	ENSMUSG00000022323	Rida	-0.42438	5.58005e-05	0.00141918
539	ENSMUSG00000022110	Sucla2	-0.585581	5.61064e-05	0.00142431
540	ENSMUSG00000024695	Zfp91	-0.343366	5.62266e-05	0.00142472
541	ENSMUSG00000103107	Gm9867	0.830801	5.65045e-05	0.00142911
542	ENSMUSG00000001521	Tulp3	0.394761	5.72534e-05	0.00144538
543	ENSMUSG00000056071	S100a9	1.58915	5.78472e-05	0.00145501
544	ENSMUSG00000045319	Proser2	0.831192	5.77443e-05	0.00145501
545	ENSMUSG00000001366	Fbxo9	-0.358214	6.00749e-05	0.00150826
546	ENSMUSG00000025508	Rplp2	0.48096	6.02109e-05	0.00150891
547	ENSMUSG00000064202	Spata6l	-0.775851	6.09e-05	0.00152339
548	ENSMUSG00000024855	Pacs1	0.397615	6.1174e-05	0.00152745
549	ENSMUSG00000045005	Fzd5	0.780745	6.13512e-05	0.0015288
550	ENSMUSG00000056429	Tgoln1	-0.47162	6.14515e-05	0.0015288
551	ENSMUSG00000074218	Cox7a1	-0.739934	6.16202e-05	0.00153022
552	ENSMUSG00000046447	Camk2n1	0.910424	6.20322e-05	0.00153488
553	ENSMUSG00000067274	Rplp0	0.509035	6.19808e-05	0.00153488
554	ENSMUSG00000029068	Ccnl2	0.320167	6.23511e-05	0.00153721
555	ENSMUSG00000023723	Mrps23	-0.387548	6.22706e-05	0.00153721
556	ENSMUSG00000054405	Dnajc8	0.24657	6.24788e-05	0.00153759
557	ENSMUSG00000038683	Pak1ip1	-0.23425	6.26824e-05	0.00153983
558	ENSMUSG00000021884	Hacl1	-0.404967	6.30447e-05	0.00154595
559	ENSMUSG00000041629	Fam104a	-0.260006	6.34756e-05	0.00155373
560	ENSMUSG00000020460	Rps27a	0.445491	6.38513e-05	0.00156014
561	ENSMUSG00000024749	Tmc1	4.10676	6.43958e-05	0.00156847
562	ENSMUSG00000003778	Brd8	0.292314	6.44215e-05	0.00156847
563	ENSMUSG00000050708	Ftl1	0.288123	6.5123e-05	0.00158273
564	ENSMUSG00000029127	Zbtb49	0.469177	6.62663e-05	0.00160745
565	ENSMUSG00000020605	Hs1bp3	0.382883	6.64926e-05	0.00160745
566	ENSMUSG00000064363	mt-Nd4	-0.609177	6.64762e-05	0.00160745
567	ENSMUSG00000020086	Macroh2a2	1.03083	6.67726e-05	0.00160854
568	ENSMUSG00000020456	Ogdh	-0.602155	6.67628e-05	0.00160854
569	ENSMUSG00000038023	Atp6v0a2	-0.254425	6.70347e-05	0.00161201
570	ENSMUSG00000032702	Kank1	0.452722	6.74636e-05	0.00161914
571	ENSMUSG00000041650	Pcca	-0.539722	6.75677e-05	0.00161914
572	ENSMUSG00000030494	Rhpn2	0.716609	7.25745e-05	0.00173608
573	ENSMUSG00000007107	Atp1a4	1.59362	7.27202e-05	0.00173653
574	ENSMUSG00000023832	Acat2	0.321469	7.32274e-05	0.00174559
575	ENSMUSG00000035478	Mbd3	-0.273197	7.50886e-05	0.00178685
576	ENSMUSG00000036817	Sun1	0.30328	7.69956e-05	0.00182588
577	ENSMUSG00000027371	Fahd2a	-0.488911	7.69521e-05	0.00182588
578	ENSMUSG00000039001	Rps21	0.505488	7.844e-05	0.00185691
579	ENSMUSG00000020432	Tcn2	0.825571	7.87716e-05	0.00186154
580	ENSMUSG00000039048	Foxred1	-0.424616	8.07526e-05	0.00190495
581	ENSMUSG00000021748	Pdhb	-0.54613	8.0887e-05	0.00190495
582	ENSMUSG00000024208	Uqcc2	-0.35313	8.10505e-05	0.00190552
583	ENSMUSG00000047777	Phf13	0.686384	8.13447e-05	0.00190916
584	ENSMUSG00000052337	Immt	-0.411453	8.17986e-05	0.00191652
585	ENSMUSG00000043716	Rpl7	0.416864	8.26223e-05	0.00193252
586	ENSMUSG00000058966	Tlcd3b	-0.630739	8.29265e-05	0.00193302
587	ENSMUSG00000033544	Angptl1	-1.03041	8.29252e-05	0.00193302
588	ENSMUSG00000034088	Hdlbp	-0.195806	8.32251e-05	0.00193668
589	ENSMUSG00000001918	Slc1a5	1.20547	8.36341e-05	0.00194159
590	ENSMUSG00000053358	Gm9905	0.815202	8.372e-05	0.00194159
591	ENSMUSG00000042709	Atpaf2	-0.461351	8.40293e-05	0.00194547
592	ENSMUSG00000033732	Sf3b3	0.291423	8.54376e-05	0.00197141
593	ENSMUSG00000031253	Srpx2	-1.39056	8.53541e-05	0.00197141
594	ENSMUSG00000005470	Asf1b	-0.746588	8.70868e-05	0.00200607
595	ENSMUSG00000035642	Aamdc	-0.413843	8.77808e-05	0.00201866
596	ENSMUSG00000058013	Septin11	0.470252	8.80902e-05	0.00202112
597	ENSMUSG00000025794	Rpl14	0.447382	8.81831e-05	0.00202112
598	ENSMUSG00000019066	Rab3d	0.375958	8.84875e-05	0.00202471
599	ENSMUSG00000026730	Pter	-0.44558	8.88291e-05	0.00202913
600	ENSMUSG00000030588	Yif1b	-0.323759	9.18429e-05	0.00209448
601	ENSMUSG00000054452	Tle5	-0.25136	9.26233e-05	0.00210526
602	ENSMUSG00000027378	Nphp1	-0.505514	9.25926e-05	0.00210526
603	ENSMUSG00000030452	Nipa2	-0.274304	9.32767e-05	0.00211659
604	ENSMUSG00000046909	Tefm	-0.363736	9.38952e-05	0.0021271
605	ENSMUSG00000036599	Chst12	0.422714	9.42241e-05	0.00213102
606	ENSMUSG00000108763	Gm36028	-1.34853	9.50368e-05	0.00214585
607	ENSMUSG00000037904	Ankrd9	-0.664596	9.68431e-05	0.00218304
608	ENSMUSG00000001138	Cnnm3	0.516976	9.75529e-05	0.00219542
609	ENSMUSG00000041548	Hspb8	-1.18307	9.85736e-05	0.00221475
610	ENSMUSG00000029449	Rhof	0.995974	0.000100537	0.00225515
611	ENSMUSG00000030978	Rrm1	-0.321398	0.000101149	0.00226516
612	ENSMUSG00000030315	Vgll4	0.833982	0.000103921	0.00231649
613	ENSMUSG00000034007	Scaper	0.429453	0.000103948	0.00231649
614	ENSMUSG00000061397	Krt79	-1.37593	0.000103935	0.00231649
615	ENSMUSG00000026611	Spata17	-0.979747	0.000104924	0.00233442
616	ENSMUSG00000022096	Hr	-1.12398	0.000105306	0.00233914
617	ENSMUSG00000060475	Wtap	0.175406	0.000105672	0.00234345
618	ENSMUSG00000030095	Tmem43	0.438068	0.000106579	0.00235974
619	ENSMUSG00000022307	Oxr1	0.236523	0.000107678	0.00238021
620	ENSMUSG00000035456	Prdm8	1.96182	0.000108687	0.00239864
621	ENSMUSG00000042185	Nfrkb	0.322058	0.00010904	0.00240258
622	ENSMUSG00000021339	Mrs2	-0.398879	0.000109418	0.00240701
623	ENSMUSG00000020268	Lyrm7	-0.493552	0.000110128	0.00241876
624	ENSMUSG00000107877	4933427D14Rik	1.71337	0.000110536	0.00242382
625	ENSMUSG00000030536	Iqgap1	-0.391158	0.000111791	0.00244179
626	ENSMUSG00000074170	Plekhf1	-0.695387	0.000111606	0.00244179
627	ENSMUSG00000050556	Kcnb1	-1.01703	0.000111891	0.00244179
628	ENSMUSG00000026872	Zeb2	0.433584	0.000112201	0.00244466
629	ENSMUSG00000032399	Rpl4	0.39736	0.000113325	0.00246523
630	ENSMUSG00000021408	Ripk1	0.231597	0.000113975	0.00247542
631	ENSMUSG00000057230	Aak1	-0.189841	0.00011419	0.00247616
632	ENSMUSG00000027263	Tubgcp4	-0.211589	0.000115247	0.00249512
633	ENSMUSG00000021193	Pitrm1	-0.21512	0.000116691	0.0025224
634	ENSMUSG00000039450	Dcxr	0.51258	0.000118819	0.00256332
635	ENSMUSG00000025878	Uimc1	0.293874	0.000118959	0.00256332
636	ENSMUSG00000022969	Il10rb	0.466894	0.000120002	0.00256737
637	ENSMUSG00000039509	Nup133	0.310854	0.000119738	0.00256737
638	ENSMUSG00000078937	Cpt1b	-0.543044	0.000119896	0.00256737
639	ENSMUSG00000005299	Letm1	-0.561313	0.000119609	0.00256737
640	ENSMUSG00000026568	Mpc2	-0.645598	0.000120085	0.00256737
641	ENSMUSG00000024803	Ankrd1	1.93312	0.000120869	0.0025767
642	ENSMUSG00000021666	Gfm2	-0.311573	0.000120898	0.0025767
643	ENSMUSG00000034762	Glis1	1.66025	0.0001218	0.0025919
644	ENSMUSG00000021185	Dglucy	0.640487	0.000122829	0.00260974
645	ENSMUSG00000025940	Tmem70	-0.334006	0.000123221	0.00261401
646	ENSMUSG00000026926	Pmpca	-0.248797	0.000126472	0.00267882
647	ENSMUSG00000023031	Cela1	-1.14499	0.000126862	0.00268293
648	ENSMUSG00000040488	Ltbp4	-0.37498	0.000127205	0.00268604
649	ENSMUSG00000032417	Rwdd2a	1.13459	0.00012796	0.00269366
650	ENSMUSG00000039470	Zdhhc2	0.451891	0.000127853	0.00269366
651	ENSMUSG00000025571	Tnrc6c	0.22077	0.000128342	0.00269693
652	ENSMUSG00000048429	Timm29	-0.204152	0.00012909	0.00269693
653	ENSMUSG00000039914	Coq10a	-0.387168	0.000128512	0.00269693
654	ENSMUSG00000029762	Akr1b8	-0.513415	0.000129101	0.00269693
655	ENSMUSG00000040711	Sh3pxd2b	-0.64422	0.000128756	0.00269693
656	ENSMUSG00000049327	Kmt5a	-0.535816	0.000129513	0.0026973
657	ENSMUSG00000043487	Acot6	-0.536373	0.000129418	0.0026973
658	ENSMUSG00000032294	Pkm	-0.470847	0.000130321	0.00271001
659	ENSMUSG00000069208	Zfp825	-0.865674	0.000131762	0.00273582
660	ENSMUSG00000029445	Hpd	2.01241	0.000133603	0.00276983
661	ENSMUSG00000020307	Cdc34	-0.307102	0.00013429	0.00277986
662	ENSMUSG00000058600	Rpl30	0.381029	0.000134879	0.00278783
663	ENSMUSG00000030203	Dusp16	-0.603318	0.000135584	0.00279819
664	ENSMUSG00000073481	Mtarc2	0.271074	0.000135929	0.00280109
665	ENSMUSG00000025287	Acot9	-0.20925	0.000136225	0.00280296
666	ENSMUSG00000057561	Eif1a	0.406453	0.000136799	0.00281055
667	ENSMUSG00000033629	Hacd3	0.27771	0.000137379	0.00281822
668	ENSMUSG00000024777	Ppp2r5b	-0.468513	0.00013806	0.00282795
669	ENSMUSG00000027774	Gfm1	-0.42385	0.000138291	0.00282844
670	ENSMUSG00000019564	Arid3a	0.583102	0.000138928	0.00283527
671	ENSMUSG00000038208	Pgap3	0.48945	0.000139039	0.00283527
672	ENSMUSG00000049517	Rps23	0.418914	0.000140338	0.00285752
673	ENSMUSG00000027981	Rnpc3	0.437296	0.000141623	0.00287225
674	ENSMUSG00000022836	Mylk	-0.290712	0.000141515	0.00287225
675	ENSMUSG00000035877	Zhx3	-0.440643	0.000141692	0.00287225
676	ENSMUSG00000052117	D630039A03Rik	2.2098	0.000142412	0.00287832
677	ENSMUSG00000029832	Nfe2l3	1.34095	0.000142378	0.00287832
678	ENSMUSG00000035376	Hacd2	-0.491304	0.000142841	0.00288272
679	ENSMUSG00000028936	Rpl22	0.355995	0.000144616	0.00291426
680	ENSMUSG00000026275	Ppp1r7	0.264484	0.000145197	0.00291738
681	ENSMUSG00000042167	Tent2	0.256911	0.00014519	0.00291738
682	ENSMUSG00000028133	Rwdd3	0.721699	0.000146654	0.00294102
683	ENSMUSG00000035781	R3hdm4	0.205647	0.000146804	0.00294102
684	ENSMUSG00000033068	Entpd6	0.381115	0.000147313	0.0029469
685	ENSMUSG00000023267	Gabrr2	1.10359	0.000150707	0.00300876
686	ENSMUSG00000022814	Umps	0.536052	0.000151486	0.00300876
687	ENSMUSG00000079641	Rpl39	0.481629	0.000151074	0.00300876
688	ENSMUSG00000030770	Parva	0.324163	0.000151037	0.00300876
689	ENSMUSG00000025764	Jade1	0.268333	0.000151505	0.00300876
690	ENSMUSG00000026492	Tfb2m	-0.268279	0.000152151	0.00301723
691	ENSMUSG00000026027	Stradb	-0.627536	0.000152601	0.00302176
692	ENSMUSG00000071847	Apcdd1	1.05114	0.000153249	0.00302585
693	ENSMUSG00000002833	Hdgfl2	0.310162	0.000153156	0.00302585
694	ENSMUSG00000023307	Marchf5	-0.30837	0.000153742	0.0030312
695	ENSMUSG00000040043	Rbms2	0.26752	0.000154041	0.00303272
696	ENSMUSG00000030842	Lamtor1	-0.268503	0.000154268	0.00303282
697	ENSMUSG00000042647	Acad12	-0.551524	0.000154507	0.00303316
698	ENSMUSG00000025651	Uqcrc1	-0.494939	0.000157148	0.0030806
699	ENSMUSG00000022013	Dnajc15	-0.383407	0.000159348	0.00311926
700	ENSMUSG00000070427	Il18bp	0.579296	0.00016103	0.00314768
701	ENSMUSG00000022206	Npr3	0.64308	0.00016154	0.00315315
702	ENSMUSG00000027430	Dtd1	0.312278	0.000161977	0.00315444
703	ENSMUSG00000030980	Knop1	-0.229193	0.000162068	0.00315444
704	ENSMUSG00000030087	Klf15	0.733099	0.000163817	0.00318395
705	ENSMUSG00000024078	Ttc27	0.358719	0.000165526	0.00320352
706	ENSMUSG00000033885	Pxk	0.262919	0.000165221	0.00320352
707	ENSMUSG00000063576	Klhdc3	-0.205245	0.000165516	0.00320352
708	ENSMUSG00000017493	Igfbp4	0.775799	0.000166402	0.00320414
709	ENSMUSG00000024743	Syt7	0.57882	0.000166816	0.00320414
710	ENSMUSG00000034473	Sec22a	0.366613	0.000166614	0.00320414
711	ENSMUSG00000015846	Rxra	0.318961	0.000166963	0.00320414
712	ENSMUSG00000021474	Sfxn1	-0.329615	0.000166946	0.00320414
713	ENSMUSG00000096210	H1f0	-0.468442	0.000165847	0.00320414
714	ENSMUSG00000035296	Sgcg	-0.251307	0.00016785	0.00321666
715	ENSMUSG00000037601	Nme1	-0.302348	0.000172884	0.00330849
716	ENSMUSG00000034518	Hmgxb4	0.306193	0.000173674	0.00331434
717	ENSMUSG00000059920	4930453N24Rik	-0.324197	0.000173537	0.00331434
718	ENSMUSG00000028657	Ppt1	0.202368	0.000174291	0.00332149
719	ENSMUSG00000064354	mt-Co2	-0.54275	0.000175676	0.00334321
720	ENSMUSG00000040618	Pck2	0.879232	0.000176696	0.00335795
721	ENSMUSG00000051043	Gprc5c	0.752828	0.000182219	0.00344855
722	ENSMUSG00000073435	Nme3	0.567281	0.000181987	0.00344855
723	ENSMUSG00000035011	Zbtb7a	-0.279671	0.000182084	0.00344855
724	ENSMUSG00000031691	Tnpo2	-0.187529	0.000183514	0.00346347
725	ENSMUSG00000063873	Slc24a3	-0.395681	0.000183276	0.00346347
726	ENSMUSG00000045094	Arhgef37	-0.999679	0.000184016	0.00346817
727	ENSMUSG00000073791	Efcab7	0.908075	0.000186175	0.00350055
728	ENSMUSG00000058997	Vwa8	-0.489385	0.000186245	0.00350055
729	ENSMUSG00000003541	Ier3	-0.628477	0.000186846	0.00350701
730	ENSMUSG00000038539	Atf5	-0.70126	0.000188033	0.00352446
731	ENSMUSG00000044148	1810030O07Rik	0.246505	0.000188992	0.00353758
732	ENSMUSG00000063801	Ap3s2	0.23121	0.000189696	0.00354591
733	ENSMUSG00000064215	Ifi27	-0.598771	0.000190873	0.00356306
734	ENSMUSG00000023068	Nus1	-0.245646	0.000191724	0.00357407
735	ENSMUSG00000050919	Zfp366	-0.570038	0.000193965	0.00360602
736	ENSMUSG00000058672	Tubb2a	-0.644517	0.000193773	0.00360602
737	ENSMUSG00000038467	Chmp4b	-0.152096	0.000195101	0.0036222
738	ENSMUSG00000038412	Higd1a	-0.467011	0.000195801	0.00363028
739	ENSMUSG00000028234	Rps20	0.457065	0.000197073	0.00364127
740	ENSMUSG00000035764	Fbxo45	0.378161	0.000196805	0.00364127
741	ENSMUSG00000032103	Pus3	-0.370968	0.000197192	0.00364127
742	ENSMUSG00000028600	Podn	0.690215	0.000197518	0.00364237
743	ENSMUSG00000048038	Ccdc187	1.97254	0.000198048	0.00364723
744	ENSMUSG00000021939	Ctsb	0.397391	0.00019943	0.00366774
745	ENSMUSG00000036241	Ube2r2	-0.2616	0.000201543	0.00368819
746	ENSMUSG00000045948	Mrps12	-0.274171	0.00020162	0.00368819
747	ENSMUSG00000030729	Pgm2l1	-0.37484	0.000201	0.00368819
748	ENSMUSG00000052565	H1f3	-1.65186	0.00020113	0.00368819
749	ENSMUSG00000037960	Card19	-0.342108	0.000202751	0.00370392
750	ENSMUSG00000054863	Tafa5	-0.872542	0.000204903	0.00373825
751	ENSMUSG00000004897	Hdgf	-0.174857	0.00020653	0.00375791
752	ENSMUSG00000021236	Entpd5	-0.545149	0.000206348	0.00375791
753	ENSMUSG00000034987	Hrh2	0.658614	0.000207494	0.00377043
754	ENSMUSG00000030137	Tuba8	-0.627044	0.000210734	0.00382423
755	ENSMUSG00000027878	Notch2	0.252031	0.000212768	0.00385604
756	ENSMUSG00000044533	Rps2	0.480749	0.000214343	0.00387944
757	ENSMUSG00000003437	Paf1	0.33783	0.000217129	0.00392466
758	ENSMUSG00000079435	Rpl36a	0.525799	0.000217904	0.00393349
759	ENSMUSG00000038963	Slco4a1	-1.79852	0.000221506	0.00399324
760	ENSMUSG00000024330	Col11a2	0.591657	0.00022282	0.0040075
761	ENSMUSG00000044018	Mrpl50	-0.353831	0.000222883	0.0040075
762	ENSMUSG00000029840	Mtpn	-0.192322	0.0002241	0.0040241
763	ENSMUSG00000081534	Slc48a1	0.26463	0.000225457	0.00404315
764	ENSMUSG00000038624	Nepn	0.660132	0.000225926	0.00404627
765	ENSMUSG00000027188	Pamr1	0.692307	0.000227103	0.00406203
766	ENSMUSG00000032925	Itgbl1	-1.01674	0.000227569	0.00406505
767	ENSMUSG00000040269	Mrps28	-0.364288	0.000228838	0.00408238
768	ENSMUSG00000028756	Pink1	-0.321711	0.000229936	0.00409663
769	ENSMUSG00000031488	Rab11fip1	0.451003	0.000232426	0.00413561
770	ENSMUSG00000002475	Abhd3	0.64326	0.000233217	0.00414429
771	ENSMUSG00000067878	Map7d3	0.780369	0.000243261	0.00430762
772	ENSMUSG00000020654	Adcy3	0.569588	0.000243173	0.00430762
773	ENSMUSG00000052423	B4galt3	0.275026	0.000243353	0.00430762
774	ENSMUSG00000059278	Naa38	-0.364361	0.000245231	0.00432967
775	ENSMUSG00000074825	Itpripl1	-0.513756	0.00024508	0.00432967
776	ENSMUSG00000065947	mt-Nd4l	-0.598721	0.000246022	0.00433803
777	ENSMUSG00000000339	Rtca	-0.249054	0.000250223	0.00440076
778	ENSMUSG00000025920	Stau2	-0.472362	0.000250006	0.00440076
779	ENSMUSG00000025993	Slc40a1	0.915301	0.000251576	0.00441322
780	ENSMUSG00000025967	Eef1b2	0.364325	0.000251463	0.00441322
781	ENSMUSG00000041199	Rpusd1	0.36082	0.000255538	0.00447698
782	ENSMUSG00000032449	Slc25a36	0.234836	0.000261219	0.00457067
783	ENSMUSG00000032841	Prr5l	1.07905	0.000265444	0.00462684
784	ENSMUSG00000053411	Cbx7	0.533378	0.000265392	0.00462684
785	ENSMUSG00000116138	C030006K11Rik	-0.463998	0.000264999	0.00462684
786	ENSMUSG00000039096	Rsad1	-0.385491	0.000267921	0.00466407
787	ENSMUSG00000038482	Tfdp1	-0.288172	0.000268764	0.00467281
788	ENSMUSG00000022031	Elp3	0.266644	0.000269931	0.00468714
789	ENSMUSG00000018599	Mief2	-0.300034	0.000270487	0.00469085
790	ENSMUSG00000042106	Inka1	0.693608	0.000271367	0.00470014
791	ENSMUSG00000034795	Ccdc122	-0.55081	0.000275031	0.00475758
792	ENSMUSG00000074093	Svip	-0.381349	0.000275956	0.00476757
793	ENSMUSG00000037787	Coa8	-0.231839	0.000276448	0.00477003
794	ENSMUSG00000012848	Rps5	0.574038	0.000278348	0.00479676
795	ENSMUSG00000063457	Rps15	0.4708	0.00027906	0.004803
796	ENSMUSG00000031365	Zfp275	0.35787	0.000279513	0.00480474
797	ENSMUSG00000031938	4931406C07Rik	-0.494611	0.000280073	0.00480834
798	ENSMUSG00000045409	Trim39	0.215888	0.000281873	0.00483133
799	ENSMUSG00000005087	Cd44	-0.914613	0.000282119	0.00483133
800	ENSMUSG00000037573	Tob1	1.13801	0.000288787	0.00493933
801	ENSMUSG00000099083	Atf7	0.263467	0.000289714	0.00494902
802	ENSMUSG00000038042	Ptpdc1	0.35358	0.000291262	0.00496925
803	ENSMUSG00000051748	Wfdc21	-1.81646	0.000293668	0.00500405
804	ENSMUSG00000062397	Zfp706	0.287026	0.000294892	0.00501866
805	ENSMUSG00000031558	Slit2	1.31317	0.000295638	0.00502511
806	ENSMUSG00000028580	Pum1	-0.227505	0.000297689	0.0050537
807	ENSMUSG00000066406	Akap13	-0.398052	0.000300189	0.00508982
808	ENSMUSG00000010914	Pdhx	-0.383704	0.000300655	0.00509141
809	ENSMUSG00000038393	Txnip	0.577076	0.00030283	0.0051219
810	ENSMUSG00000038119	Cdon	-0.727256	0.000305271	0.00515682
811	ENSMUSG00000026796	Niban2	-0.524371	0.000306021	0.00516311
812	ENSMUSG00000037106	Fer1l6	-1.93251	0.000306523	0.00516521
813	ENSMUSG00000021111	Papola	-0.25781	0.000307308	0.00516572
814	ENSMUSG00000036570	Fxyd1	-0.342985	0.000307266	0.00516572
815	ENSMUSG00000043518	Rai2	0.566063	0.000309348	0.00518092
816	ENSMUSG00000030029	Lrig1	-0.586507	0.000308591	0.00518092
817	ENSMUSG00000002983	Relb	-0.594091	0.000309165	0.00518092
818	ENSMUSG00000014498	Ankrd52	-0.510449	0.000309745	0.00518122
819	ENSMUSG00000021520	Uqcrb	-0.405152	0.000314304	0.00525106
820	ENSMUSG00000034936	Arl4d	0.75146	0.000315022	0.00525664
821	ENSMUSG00000071454	Dtnb	0.500351	0.000316226	0.00527031
822	ENSMUSG00000032739	Pram1	0.971237	0.000317361	0.00528156
823	ENSMUSG00000064356	mt-Atp8	-0.669751	0.000317674	0.00528156
824	ENSMUSG00000075324	Fign	0.779256	0.000318139	0.00528289
825	ENSMUSG00000022453	Naga	0.38304	0.000319356	0.00529666
826	ENSMUSG00000072066	6720489N17Rik	0.65671	0.000325721	0.0053957
827	ENSMUSG00000029270	Dipk1a	-0.428808	0.000331237	0.00548044
828	ENSMUSG00000042249	Grk3	-0.696586	0.000331776	0.00548272
829	ENSMUSG00000046761	Fam83h	0.777189	0.000333454	0.00550381
830	ENSMUSG00000015335	Zdhhc12	0.509635	0.000335372	0.00552878
831	ENSMUSG00000021235	Coq6	-0.512808	0.000337155	0.00555149
832	ENSMUSG00000078486	Perm1	-1.00144	0.00033829	0.00556348
833	ENSMUSG00000024940	Ltbp3	-0.677668	0.000339001	0.00556849
834	ENSMUSG00000029328	Hnrnpdl	0.232252	0.000339833	0.00557547
835	ENSMUSG00000031353	Rbbp7	0.224105	0.0003419	0.00560265
836	ENSMUSG00000062867	Impdh2	0.390089	0.000343597	0.00562373
837	ENSMUSG00000036295	Lrrn3	1.30008	0.000344865	0.00563774
838	ENSMUSG00000031523	Dlc1	0.500414	0.000348167	0.00568493
839	ENSMUSG00000020585	Laptm4a	0.166541	0.000351408	0.00573101
840	ENSMUSG00000035142	Nubpl	-0.390748	0.000353488	0.00575806
841	ENSMUSG00000032578	Cish	1.41388	0.000354983	0.00577554
842	ENSMUSG00000027642	Rpn2	0.207473	0.000355996	0.00578515
843	ENSMUSG00000000168	Dlat	-0.540013	0.000363594	0.00590161
844	ENSMUSG00000027469	Tpx2	-0.907345	0.000365173	0.00592021
845	ENSMUSG00000056054	S100a8	1.31189	0.000369404	0.00597731
846	ENSMUSG00000061859	Patj	0.684718	0.000369568	0.00597731
847	ENSMUSG00000061273	Mmgt1	-0.251948	0.000370237	0.00598106
848	ENSMUSG00000038582	Pptc7	0.615153	0.0003708	0.00598308
849	ENSMUSG00000037035	Inhbb	1.022	0.00037277	0.00599367
850	ENSMUSG00000037012	Hk1	-0.506407	0.00037234	0.00599367
851	ENSMUSG00000020014	Cfap54	-0.844367	0.000371915	0.00599367
852	ENSMUSG00000042535	Gtpbp1	0.246272	0.000375392	0.00602168
853	ENSMUSG00000024747	Aldh1a7	-0.835456	0.000375208	0.00602168
854	ENSMUSG00000040084	Bub1b	-0.691232	0.000377366	0.00604626
855	ENSMUSG00000038126	Mphosph9	0.446201	0.000377843	0.00604681
856	ENSMUSG00000041161	Otud3	-0.474431	0.00037935	0.00606383
857	ENSMUSG00000040548	Tex2	-0.168679	0.000380169	0.00606984
858	ENSMUSG00000005981	Trap1	-0.3596	0.000385388	0.006146
859	ENSMUSG00000048234	Rnf149	-0.408365	0.000385929	0.00614746
860	ENSMUSG00000006641	Slc5a6	0.428898	0.000394503	0.00626943
861	ENSMUSG00000025173	Wdr45b	0.228069	0.000394477	0.00626943
862	ENSMUSG00000050777	Tmem37	0.688198	0.000398281	0.00632213
863	ENSMUSG00000001751	Naglu	0.521781	0.000402557	0.00636444
864	ENSMUSG00000057322	Rpl38	0.477305	0.000401883	0.00636444
865	ENSMUSG00000026201	Stk16	-0.271523	0.000402807	0.00636444
866	ENSMUSG00000038543	BC028528	-0.694349	0.000402175	0.00636444
867	ENSMUSG00000040997	Abhd4	0.438023	0.000404602	0.0063757
868	ENSMUSG00000020453	Patz1	0.428224	0.000404564	0.0063757
869	ENSMUSG00000058230	Arhgap35	-0.334033	0.000405908	0.0063757
870	ENSMUSG00000002345	Borcs8	-0.375594	0.000406315	0.0063757
871	ENSMUSG00000022474	Pmm1	-0.424697	0.000405601	0.0063757
872	ENSMUSG00000032452	Clstn2	-0.750082	0.000405484	0.0063757
873	ENSMUSG00000068184	Ndufaf2	-0.546175	0.00040701	0.00637929
874	ENSMUSG00000029196	Tada2b	-0.363726	0.000408048	0.00638825
875	ENSMUSG00000017715	Pgs1	-0.281409	0.000409365	0.00640154
876	ENSMUSG00000064357	mt-Atp6	-0.556492	0.000411887	0.00643362
877	ENSMUSG00000093661	Eif4e3	-0.27411	0.000413052	0.00644446
878	ENSMUSG00000064341	mt-Nd1	-0.385587	0.000413931	0.00645082
879	ENSMUSG00000063445	Nmral1	0.429122	0.00041634	0.00648098
880	ENSMUSG00000025159	Mms19	0.283441	0.000419899	0.00652895
881	ENSMUSG00000049672	Zbtb14	-0.356865	0.000424072	0.00658635
882	ENSMUSG00000003779	Kif20a	-0.925061	0.000425097	0.00659479
883	ENSMUSG00000030747	Dgat2	-0.652269	0.000429291	0.00665231
884	ENSMUSG00000058546	Rpl23a	0.278268	0.00043154	0.00667205
885	ENSMUSG00000040289	Hey1	-0.833116	0.000431467	0.00667205
886	ENSMUSG00000022982	Sod1	0.259919	0.00043371	0.00669803
887	ENSMUSG00000040820	Hlcs	0.495331	0.000434878	0.00670157
888	ENSMUSG00000020864	Ankrd40	-0.310583	0.000434919	0.00670157
889	ENSMUSG00000002104	Rapsn	0.963342	0.000436312	0.00670794
890	ENSMUSG00000098274	Rpl24	0.335584	0.00043625	0.00670794
891	ENSMUSG00000078154	Gm12184	2.10767	0.000438361	0.00672509
892	ENSMUSG00000036585	Fgf1	0.604209	0.000438411	0.00672509
893	ENSMUSG00000032575	Manf	-0.372772	0.00043895	0.00672581
894	ENSMUSG00000017843	Ppp2r5c	-0.141466	0.000444118	0.00679739
895	ENSMUSG00000036158	Prickle1	-0.593777	0.000447695	0.00684449
896	ENSMUSG00000022884	Eif4a2	0.270903	0.000452191	0.0069028
897	ENSMUSG00000031012	Cask	0.25727	0.000452519	0.0069028
898	ENSMUSG00000021361	Tmem14c	-0.46696	0.000453239	0.00690609
899	ENSMUSG00000030649	Anapc15	-0.328394	0.000455244	0.00692893
900	ENSMUSG00000033961	Zfp446	0.372717	0.000457038	0.00694851
901	ENSMUSG00000022843	Clcn2	0.489429	0.000457684	0.0069506
902	ENSMUSG00000025188	Hps1	0.529338	0.000460144	0.00697249
903	ENSMUSG00000034845	Plvap	0.398504	0.000459901	0.00697249
904	ENSMUSG00000071014	Ndufb6	-0.431271	0.000461296	0.00698221
905	ENSMUSG00000054720	Lrrc8c	-0.551361	0.000466448	0.00705238
906	ENSMUSG00000042275	Pelo	0.4971	0.000467435	0.0070595
907	ENSMUSG00000040596	Pogk	-0.226043	0.000468379	0.00706596
908	ENSMUSG00000031485	Plpbp	0.150377	0.000469542	0.007068
909	ENSMUSG00000038943	Prc1	-0.929944	0.000469547	0.007068
910	ENSMUSG00000073838	Tufm	-0.343772	0.000473112	0.00711384
911	ENSMUSG00000054752	Fsd1l	-0.375438	0.000482515	0.00724727
912	ENSMUSG00000028085	Gatb	-0.491168	0.000484104	0.00726315
913	ENSMUSG00000031925	Maml2	0.378254	0.000484876	0.00726677
914	ENSMUSG00000042369	Rbm45	-0.321525	0.000489646	0.00733023
915	ENSMUSG00000026411	Tmem9	0.390157	0.000490875	0.0073406
916	ENSMUSG00000043155	Hpdl	-0.734341	0.000491592	0.0073433
917	ENSMUSG00000052040	Klf13	-0.368831	0.0004932	0.00735927
918	ENSMUSG00000071547	Nt5dc2	0.739676	0.000494894	0.00737651
919	ENSMUSG00000026701	Prdx6	0.27618	0.000497709	0.00741039
920	ENSMUSG00000046694	Tent5b	1.31327	0.000502165	0.00745777
921	ENSMUSG00000040097	Flywch1	0.212806	0.000501489	0.00745777
922	ENSMUSG00000048007	Timm8a1	-0.339109	0.000502526	0.00745777
923	ENSMUSG00000015053	Gata2	-0.33566	0.000503989	0.00747138
924	ENSMUSG00000079020	Slc45a4	0.440033	0.000504554	0.00747166
925	ENSMUSG00000020823	Sec14l1	-0.30854	0.000506928	0.0074987
926	ENSMUSG00000030685	Kctd13	0.556394	0.000508786	0.00751256
927	ENSMUSG00000074264	Amy1	0.34446	0.000508963	0.00751256
928	ENSMUSG00000001786	Fbxo7	0.304715	0.000512282	0.00755339
929	ENSMUSG00000028655	Mfsd2a	3.14035	0.000516568	0.00760021
930	ENSMUSG00000044628	Rnf208	1.54118	0.00051619	0.00760021
931	ENSMUSG00000021577	Sdha	-0.524233	0.000519534	0.00763565
932	ENSMUSG00000063882	Uqcrh	-0.362744	0.000521549	0.00765703
933	ENSMUSG00000046324	Ermp1	-0.191034	0.000522645	0.0076649
934	ENSMUSG00000038717	Atp5l	-0.368811	0.000523205	0.0076649
935	ENSMUSG00000053641	Dennd4a	0.447565	0.0005284	0.0077106
936	ENSMUSG00000056209	Npm3	0.263312	0.000527679	0.0077106
937	ENSMUSG00000001783	Rtcb	0.185331	0.000528579	0.0077106
938	ENSMUSG00000024781	Lipa	-0.339632	0.000527307	0.0077106
939	ENSMUSG00000037072	Selenof	-0.279645	0.000530619	0.00773212
940	ENSMUSG00000022707	Gbe1	-0.479607	0.000534966	0.00778717
941	ENSMUSG00000006395	Hyi	0.345155	0.000536624	0.00780301
942	ENSMUSG00000090733	Rps27	0.503247	0.000537871	0.00781283
943	ENSMUSG00000044950	Pwwp2a	0.386637	0.00054042	0.00784153
944	ENSMUSG00000024981	Acsl5	-0.269979	0.000542214	0.00785923
945	ENSMUSG00000031392	Irak1	-0.224073	0.000546498	0.00791295
946	ENSMUSG00000026121	Sema4c	0.502846	0.000552685	0.00799407
947	ENSMUSG00000001663	Gstt1	0.530031	0.000553412	0.00799613
948	ENSMUSG00000052957	Gas1	0.958904	0.000554517	0.00800364
949	ENSMUSG00000037108	Zcwpw1	0.532218	0.000555151	0.00800435
950	ENSMUSG00000000740	Rpl13	0.427706	0.000556979	0.00802225
951	ENSMUSG00000000823	Zfp512b	0.326326	0.000560099	0.00805871
952	ENSMUSG00000062937	Mtap	0.327215	0.000563057	0.00808483
953	ENSMUSG00000021196	Pfkp	-0.317875	0.000563096	0.00808483
954	ENSMUSG00000044864	Ankrd50	0.489158	0.000564604	0.00809798
955	ENSMUSG00000024413	Npc1	0.569534	0.000569507	0.00815942
956	ENSMUSG00000024985	Tcf7l2	0.461957	0.00057008	0.00815942
957	ENSMUSG00000005397	Nid1	-0.520994	0.000571772	0.00817508
958	ENSMUSG00000062031	Pgghg	0.24768	0.000583127	0.00832874
959	ENSMUSG00000035559	Mpv17l2	-0.452293	0.000585018	0.00834703
960	ENSMUSG00000039197	Adk	0.386136	0.00058658	0.0083519
961	ENSMUSG00000030034	Ino80b	0.313754	0.000586463	0.0083519
962	ENSMUSG00000024873	Cnih2	1.79177	0.000591681	0.00839254
963	ENSMUSG00000028032	Papss1	0.249471	0.000591888	0.00839254
964	ENSMUSG00000034157	Cipc	-0.303234	0.000590557	0.00839254
965	ENSMUSG00000024978	Gpam	-0.47675	0.00059147	0.00839254
966	ENSMUSG00000035513	Ntng2	-0.48417	0.000594899	0.0084265
967	ENSMUSG00000024982	Zdhhc6	-0.194962	0.0005956	0.0084277
968	ENSMUSG00000068206	Pick1	0.243426	0.000598575	0.00845232
969	ENSMUSG00000025237	Parp6	-0.304854	0.000598261	0.00845232
970	ENSMUSG00000050310	Rictor	0.291927	0.00060157	0.00848587
971	ENSMUSG00000022369	Mtbp	0.493706	0.000609906	0.00859459
972	ENSMUSG00000093769	H3c14	-1.04979	0.000612988	0.00862913
973	ENSMUSG00000020458	Rtn4	-0.425769	0.000614095	0.00863583
974	ENSMUSG00000037563	Rps16	0.455314	0.000616672	0.00864542
975	ENSMUSG00000002985	Apoe	0.350851	0.000616239	0.00864542
976	ENSMUSG00000037236	Matr3	0.237494	0.000616074	0.00864542
977	ENSMUSG00000030737	Slco2b1	0.414852	0.000618637	0.00866409
978	ENSMUSG00000021033	Gstz1	0.498076	0.000619738	0.00867062
979	ENSMUSG00000017760	Ctsa	0.211358	0.000620783	0.00867638
980	ENSMUSG00000067288	Rps28	0.495283	0.000626791	0.00875141
981	ENSMUSG00000009927	Rps25	0.351177	0.000635911	0.00886969
982	ENSMUSG00000028514	Usp24	0.193135	0.000637451	0.00887308
983	ENSMUSG00000071528	Atp5md	-0.365409	0.000636884	0.00887308
984	ENSMUSG00000041841	Rpl37	0.433203	0.000644308	0.00895032
985	ENSMUSG00000001323	Srr	-0.33303	0.00064383	0.00895032
986	ENSMUSG00000000759	Tubgcp3	0.249886	0.000645209	0.00895375
987	ENSMUSG00000017716	Birc5	-0.792445	0.000652527	0.00904612
988	ENSMUSG00000059834	Sclt1	0.502123	0.000657374	0.00909842
989	ENSMUSG00000023004	Tuba1b	0.359732	0.000658294	0.00909842
990	ENSMUSG00000059363	Fxn	-0.398018	0.000658244	0.00909842
991	ENSMUSG00000025171	Ubtd1	-0.408745	0.000659401	0.00910452
992	ENSMUSG00000031310	Zmym3	0.365748	0.000660803	0.00911424
993	ENSMUSG00000057715	A830018L16Rik	-0.938481	0.000661437	0.00911424
994	ENSMUSG00000064225	Paqr9	-0.742969	0.000663553	0.0091342
995	ENSMUSG00000028189	Ctbs	0.36793	0.000666121	0.00916033
996	ENSMUSG00000002266	Zim1	1.37048	0.000671318	0.00921609
997	ENSMUSG00000023262	Acy1	0.472581	0.000672104	0.00921609
998	ENSMUSG00000031486	Adgra2	-0.473705	0.000672196	0.00921609
999	ENSMUSG00000026574	Dpt	-1.07686	0.000681657	0.00933644
1000	ENSMUSG00000028229	Rmdn1	-0.459065	0.000689589	0.00943564
1001	ENSMUSG00000026687	Aldh9a1	0.286184	0.000697677	0.00953677
1002	ENSMUSG00000030231	Plekha5	0.28273	0.000698817	0.00954283
1003	ENSMUSG00000034205	Loxl2	-0.586619	0.000700279	0.00955326
1004	ENSMUSG00000044026	Slc35g1	-0.394399	0.000703865	0.00959262
1005	ENSMUSG00000056608	Chd9	-0.429128	0.000705793	0.00960932
1006	ENSMUSG00000027828	Ssr3	0.139198	0.000708102	0.00963117
1007	ENSMUSG00000059273	Zc3h4	0.163823	0.000710393	0.00965274
1008	ENSMUSG00000025209	Twnk	-0.2904	0.000713429	0.00968437
1009	ENSMUSG00000001403	Ube2c	-0.924467	0.000714413	0.00968812
1010	ENSMUSG00000005982	Naa60	-0.234994	0.000720249	0.00975759
1011	ENSMUSG00000038773	Kdm3b	0.18645	0.000722631	0.00978017
1012	ENSMUSG00000048332	Lhfp	-0.352838	0.00072361	0.00978375
1013	ENSMUSG00000051855	Mest	-1.20426	0.000727075	0.0098209
1014	ENSMUSG00000026003	Acadl	-0.406238	0.000741373	0.0100041
1015	ENSMUSG00000030538	Cib1	-0.284541	0.000745383	0.0100484
1016	ENSMUSG00000029247	Paics	0.222453	0.000752521	0.0101346
1017	ENSMUSG00000000489	Pdgfb	-0.351599	0.000753328	0.0101355
1018	ENSMUSG00000051596	Otop1	-0.501582	0.000754958	0.0101474
1019	ENSMUSG00000036904	Fzd8	0.70599	0.000756364	0.0101564
1020	ENSMUSG00000022678	Nde1	-0.191892	0.00075958	0.0101895
1021	ENSMUSG00000039065	Atpsckmt	-0.33633	0.000762325	0.0102164
1022	ENSMUSG00000029190	D5Ertd579e	-0.416172	0.000764594	0.0102367
1023	ENSMUSG00000021411	Pxdc1	0.500822	0.000768921	0.0102846
1024	ENSMUSG00000068220	Lgals1	-0.597929	0.000770306	0.0102931
1025	ENSMUSG00000028961	Pgd	-0.466293	0.000777608	0.0103805
1026	ENSMUSG00000027104	Atf2	-0.303165	0.000780071	0.0104032
1027	ENSMUSG00000031851	Ntpcr	0.37991	0.000789211	0.0105149
1028	ENSMUSG00000022754	Tmem45a	-1.13706	0.000791158	0.0105306
1029	ENSMUSG00000030522	Mtmr10	-0.280766	0.000798129	0.010613
1030	ENSMUSG00000058729	Lin9	-0.426068	0.000799178	0.0106166
1031	ENSMUSG00000033022	Cdo1	-0.589976	0.000800065	0.0106181
1032	ENSMUSG00000039789	Zfp597	-0.38258	0.000808435	0.0107188
1033	ENSMUSG00000014077	Chp1	0.275678	0.000825584	0.0109356
1034	ENSMUSG00000038522	Mfsd4b1	-0.985169	0.000826504	0.0109372
1035	ENSMUSG00000017421	Zfp207	0.238368	0.000837333	0.011062
1036	ENSMUSG00000051615	Rap2a	-0.32311	0.000837552	0.011062
1037	ENSMUSG00000028013	Ppa2	-0.361916	0.000839457	0.0110765
1038	ENSMUSG00000018474	Chd3	-0.317542	0.000843576	0.0111201
1039	ENSMUSG00000002289	Angptl4	0.49301	0.00084769	0.0111636
1040	ENSMUSG00000006392	Med8	-0.239223	0.000849103	0.0111714
1041	ENSMUSG00000038894	Irs2	1.85621	0.000851057	0.0111864
1042	ENSMUSG00000027221	Chst1	1.02003	0.000853344	0.0112057
1043	ENSMUSG00000019817	Plagl1	0.863055	0.000863632	0.0113082
1044	ENSMUSG00000024180	Pgap6	0.523593	0.000862261	0.0113082
1045	ENSMUSG00000091243	Vgll3	-0.810747	0.000862824	0.0113082
1046	ENSMUSG00000025103	Btbd1	-0.26254	0.000867924	0.0113535
1047	ENSMUSG00000020372	Rack1	0.435704	0.000870217	0.0113727
1048	ENSMUSG00000002588	Pon1	-1.12912	0.000887425	0.0115865
1049	ENSMUSG00000024260	Sap130	0.287019	0.000891705	0.0116313
1050	ENSMUSG00000024608	Rps14	0.470001	0.000894128	0.0116518
1051	ENSMUSG00000025579	Gaa	0.302571	0.000906223	0.0117869
1052	ENSMUSG00000027259	Adal	-0.432115	0.00090593	0.0117869
1053	ENSMUSG00000030207	Fam234b	0.350508	0.000907288	0.0117896
1054	ENSMUSG00000030265	Kras	-0.299787	0.000917578	0.011912
1055	ENSMUSG00000021767	Kat6b	0.260009	0.000927011	0.0120216
1056	ENSMUSG00000038965	Ube2l3	-0.217779	0.000927779	0.0120216
1057	ENSMUSG00000087687	Pet100	-0.352512	0.000931493	0.0120583
1058	ENSMUSG00000025348	Itga7	0.623056	0.000933313	0.0120704
1059	ENSMUSG00000025786	Zdhhc3	-0.180805	0.000934825	0.0120786
1060	ENSMUSG00000004951	Hspb1	-0.575078	0.000937836	0.012106
1061	ENSMUSG00000027272	Ubr1	0.241393	0.000939974	0.0121222
1062	ENSMUSG00000034807	Colgalt1	0.1939	0.000945058	0.0121763
1063	ENSMUSG00000034247	Plekhm1	-0.214653	0.000948098	0.012204
1064	ENSMUSG00000030605	Mfge8	0.813906	0.000953038	0.0122464
1065	ENSMUSG00000021013	Ttc8	-0.391816	0.000953186	0.0122464
1066	ENSMUSG00000028607	Cpt2	-0.399528	0.000958272	0.0122862
1067	ENSMUSG00000020593	Lpin1	-0.649919	0.000958975	0.0122862
1068	ENSMUSG00000050335	Lgals3	-1.14493	0.000957214	0.0122862
1069	ENSMUSG00000041037	Irgq	-0.367318	0.0009608	0.0122981
1070	ENSMUSG00000034853	Acot11	-1.0214	0.000966406	0.0123583
1071	ENSMUSG00000030789	Itgax	-0.979173	0.000975523	0.0124632
1072	ENSMUSG00000020664	Dld	-0.380419	0.000978382	0.0124881
1073	ENSMUSG00000042599	Kdm7a	0.43054	0.000985358	0.0125432
1074	ENSMUSG00000044340	Phlpp1	0.38479	0.000985455	0.0125432
1075	ENSMUSG00000042041	2010003K11Rik	-0.895218	0.000984107	0.0125432
1076	ENSMUSG00000105454	Gm43830	-0.777234	0.00098688	0.0125497
1077	ENSMUSG00000045211	Nudt18	-0.569443	0.000998283	0.0126829
1078	ENSMUSG00000024972	Lgals12	0.532462	0.0010021	0.0127196
1079	ENSMUSG00000059713	Rcan3	0.372603	0.00100529	0.0127482
1080	ENSMUSG00000022272	Myo10	-0.279922	0.0010118	0.0128189
1081	ENSMUSG00000027002	Nckap1	-0.116451	0.00102339	0.0129538
1082	ENSMUSG00000028826	Maco1	0.289653	0.00102716	0.0129895
1083	ENSMUSG00000000915	Hip1r	-0.377358	0.00103089	0.0130246
1084	ENSMUSG00000027950	Chrnb2	-0.720162	0.00103513	0.0130661
1085	ENSMUSG00000044986	Tst	0.686026	0.00103925	0.0131061
1086	ENSMUSG00000030757	Zkscan2	1.30076	0.00104108	0.013117
1087	ENSMUSG00000026610	Esrrg	0.44115	0.00104533	0.0131222
1088	ENSMUSG00000026238	Ptma	0.338509	0.00104353	0.0131222
1089	ENSMUSG00000039176	Polg	0.21865	0.0010453	0.0131222
1090	ENSMUSG00000095115	Itpripl2	-0.385148	0.00104345	0.0131222
1091	ENSMUSG00000024384	Iws1	0.207524	0.00104917	0.0131464
1092	ENSMUSG00000070436	Serpinh1	-0.437652	0.00104863	0.0131464
1093	ENSMUSG00000054648	Zfp869	0.270891	0.0010607	0.0132787
1094	ENSMUSG00000006050	Sra1	0.283297	0.00106746	0.0133453
1095	ENSMUSG00000031503	Col4a2	-0.367173	0.00106798	0.0133453
1096	ENSMUSG00000020672	Sntg2	1.26297	0.0010701	0.0133475
1097	ENSMUSG00000054115	Skp2	-0.687605	0.00106998	0.0133475
1098	ENSMUSG00000005667	Mthfd2	-0.786151	0.00107114	0.0133483
1099	ENSMUSG00000032869	Psmf1	0.238489	0.00107265	0.0133549
1100	ENSMUSG00000027210	Meis2	0.33977	0.00107618	0.0133867
1101	ENSMUSG00000026664	Phyh	-0.427999	0.00108027	0.0134253
1102	ENSMUSG00000057863	Rpl36	0.561301	0.00108199	0.0134346
1103	ENSMUSG00000111375	Btbd8	0.478931	0.00108342	0.0134396
1104	ENSMUSG00000034875	Nudt19	-0.345957	0.00108473	0.0134396
1105	ENSMUSG00000110496	Gm45909	-1.1484	0.00108534	0.0134396
1106	ENSMUSG00000029310	Nudt9	-0.252715	0.00108665	0.0134436
1107	ENSMUSG00000037405	Icam1	-0.599748	0.0010879	0.0134469
1108	ENSMUSG00000020484	Xbp1	0.516468	0.00108994	0.0134599
1109	ENSMUSG00000006333	Rps9	0.260961	0.00109497	0.0135099
1110	ENSMUSG00000020564	Atxn7l1	0.370146	0.00109653	0.0135166
1111	ENSMUSG00000047368	Abhd17b	-0.331457	0.00109749	0.0135166
1112	ENSMUSG00000030934	Oat	0.38561	0.00110013	0.013537
1113	ENSMUSG00000030615	Tmem126a	-0.358123	0.00110132	0.0135394
1114	ENSMUSG00000041870	Ankrd13a	-0.206134	0.00110475	0.0135694
1115	ENSMUSG00000000253	Gmpr	-0.696329	0.0011059	0.0135713
1116	ENSMUSG00000022018	Rgcc	0.402683	0.00110841	0.013583
1117	ENSMUSG00000025255	Zfhx4	0.347632	0.00110884	0.013583
1118	ENSMUSG00000031066	Usp11	0.555524	0.0011112	0.0135876
1119	ENSMUSG00000028383	Hsdl2	0.32695	0.00111021	0.0135876
1120	ENSMUSG00000016386	Mpped2	1.01256	0.00112229	0.013711
1121	ENSMUSG00000012405	Rpl15	0.317442	0.0011299	0.0137794
1122	ENSMUSG00000020288	Ahsa2	-0.457175	0.00112962	0.0137794
1123	ENSMUSG00000007833	Aldh16a1	-0.24086	0.00113478	0.0138265
1124	ENSMUSG00000031644	Nek1	0.255494	0.00113617	0.0138311
1125	ENSMUSG00000039740	Alg2	0.28737	0.00114013	0.0138671
1126	ENSMUSG00000074867	Zfp808	0.541464	0.00115003	0.0139626
1127	ENSMUSG00000050244	Heatr1	-0.308439	0.0011499	0.0139626
1128	ENSMUSG00000027326	Knl1	-1.2225	0.00115572	0.0140192
1129	ENSMUSG00000022419	Deptor	0.43821	0.00115792	0.0140335
1130	ENSMUSG00000039231	Suv39h1	0.385961	0.00115994	0.0140455
1131	ENSMUSG00000047594	Olfr1122	-1.23182	0.00116536	0.0140986
1132	ENSMUSG00000035373	Ccl7	-1.44395	0.00116808	0.0141191
1133	ENSMUSG00000028713	Cyp4b1	1.72353	0.00118754	0.0142817
1134	ENSMUSG00000032060	Cryab	0.790428	0.00118307	0.0142817
1135	ENSMUSG00000019256	Ahr	0.662347	0.00118697	0.0142817
1136	ENSMUSG00000003527	Ess2	0.234587	0.00118906	0.0142817
1137	ENSMUSG00000033488	Cryzl2	-0.342226	0.00118815	0.0142817
1138	ENSMUSG00000020644	Id2	-0.750442	0.0011847	0.0142817
1139	ENSMUSG00000107812	Gm43935	-0.838317	0.00118795	0.0142817
1140	ENSMUSG00000007594	Hapln4	-0.923895	0.00118988	0.0142817
1141	ENSMUSG00000028647	Mycbp	-0.406675	0.00119644	0.0143353
1142	ENSMUSG00000031710	Ucp1	-0.929038	0.00119593	0.0143353
1143	ENSMUSG00000001333	Sync	-1.11831	0.00120829	0.0144646
1144	ENSMUSG00000005057	Sh2b2	-0.703312	0.00121813	0.0145697
1145	ENSMUSG00000032536	Trak1	-0.217411	0.00122489	0.0146377
1146	ENSMUSG00000073987	Ggh	0.33328	0.00122718	0.0146494
1147	ENSMUSG00000020611	Gna13	-0.256285	0.00122801	0.0146494
1148	ENSMUSG00000046032	Snx12	0.198005	0.00122914	0.0146502
1149	ENSMUSG00000006301	Tmbim1	0.398416	0.00123102	0.0146598
1150	ENSMUSG00000037225	Fgf2	0.705203	0.00123584	0.0147043
1151	ENSMUSG00000015354	Pcolce2	-0.82468	0.00124058	0.014748
1152	ENSMUSG00000035048	Anapc13	-0.239084	0.00124475	0.0147846
1153	ENSMUSG00000021319	Sfrp4	-1.31584	0.00124802	0.0148106
1154	ENSMUSG00000020828	Pld2	0.202672	0.00125563	0.0148881
1155	ENSMUSG00000028949	Smarcd3	0.345317	0.00125732	0.0148952
1156	ENSMUSG00000027715	Ccna2	-0.877262	0.00127359	0.0150749
1157	ENSMUSG00000034341	Wbp2	0.201909	0.001276	0.0150903
1158	ENSMUSG00000033405	Nudt15	-0.439232	0.00128022	0.0151141
1159	ENSMUSG00000023088	Abcc1	-0.448657	0.00127939	0.0151141
1160	ENSMUSG00000017146	Brca1	-1.10112	0.00128273	0.0151306
1161	ENSMUSG00000056749	Nfil3	-0.407995	0.00128668	0.0151642
1162	ENSMUSG00000038822	Hace1	0.271808	0.00129251	0.0152198
1163	ENSMUSG00000018593	Sparc	-0.424873	0.0012969	0.0152452
1164	ENSMUSG00000046275	Trarg1	-0.642033	0.00129632	0.0152452
1165	ENSMUSG00000005360	Slc1a3	0.461928	0.0012989	0.0152557
1166	ENSMUSG00000032036	Kirrel3	-0.780097	0.00130156	0.0152738
1167	ENSMUSG00000027282	Mtch2	-0.309336	0.00130666	0.0153205
1168	ENSMUSG00000038456	Dennd2a	0.444461	0.00130824	0.0153259
1169	ENSMUSG00000037440	Vnn1	0.859942	0.00131175	0.0153539
1170	ENSMUSG00000043733	Ptpn11	-0.234124	0.00131507	0.0153796
1171	ENSMUSG00000025956	Mettl21a	0.393469	0.00132143	0.0154408
1172	ENSMUSG00000031432	Prps1	0.557131	0.00132329	0.0154493
1173	ENSMUSG00000026170	Cyp27a1	0.487022	0.00132517	0.015458
1174	ENSMUSG00000056133	Unc93a2	1.31959	0.00133783	0.0155924
1175	ENSMUSG00000035385	Ccl2	-1.63807	0.00134021	0.0156069
1176	ENSMUSG00000029673	Auts2	-0.563172	0.00134387	0.0156362
1177	ENSMUSG00000047710	Champ1	0.280764	0.00134896	0.0156821
1178	ENSMUSG00000032265	Tent5a	0.90312	0.00135164	0.0157
1179	ENSMUSG00000033845	Mrpl15	-0.314341	0.00135348	0.0157079
1180	ENSMUSG00000073609	D2hgdh	-0.330191	0.0013577	0.0157436
1181	ENSMUSG00000060579	Fhit	-0.758125	0.00138438	0.0160394
1182	ENSMUSG00000047822	Angptl8	-1.36322	0.00139136	0.0161066
1183	ENSMUSG00000052406	Rexo4	0.202448	0.00139493	0.0161342
1184	ENSMUSG00000021180	Rps6ka5	0.402565	0.00140139	0.0161709
1185	ENSMUSG00000032431	Crtap	0.298317	0.00140253	0.0161709
1186	ENSMUSG00000019899	Lama2	-0.515083	0.00140283	0.0161709
1187	ENSMUSG00000055632	Hmcn2	-0.825446	0.00140069	0.0161709
1188	ENSMUSG00000031714	Gab1	0.525915	0.00140772	0.0162137
1189	ENSMUSG00000020423	Btg2	0.989997	0.001413	0.0162335
1190	ENSMUSG00000060376	Bckdha	-0.410851	0.00141289	0.0162335
1191	ENSMUSG00000028295	Smim8	-0.42614	0.00141133	0.0162335
1192	ENSMUSG00000027555	Car13	-0.362933	0.00142256	0.0163296
1193	ENSMUSG00000073460	Pnldc1	0.555118	0.0014335	0.0164414
1194	ENSMUSG00000022840	Adcy5	1.04966	0.00143851	0.016467
1195	ENSMUSG00000035773	Kiss1r	0.599294	0.00143934	0.016467
1196	ENSMUSG00000029559	2210016L21Rik	0.225503	0.00143775	0.016467
1197	ENSMUSG00000062794	Zfp599	1.3387	0.00144454	0.0164853
1198	ENSMUSG00000033318	Gstt2	0.79411	0.00144255	0.0164853
1199	ENSMUSG00000024099	Ndufv2	-0.397103	0.00144456	0.0164853
1200	ENSMUSG00000078898	Zfp968	0.768541	0.00144717	0.0164877
1201	ENSMUSG00000081665	Pira1	-0.886351	0.00144718	0.0164877
1202	ENSMUSG00000079562	Maea	0.210155	0.00145046	0.0164954
1203	ENSMUSG00000027652	Ralgapb	-0.141149	0.00144976	0.0164954
1204	ENSMUSG00000046794	Ppp1r3b	-0.897941	0.00145147	0.0164954
1205	ENSMUSG00000034201	Gas2l1	-0.366757	0.00145382	0.0165084
1206	ENSMUSG00000032840	Spring1	-0.378621	0.00145533	0.0165118
1207	ENSMUSG00000021830	Txndc16	0.24762	0.00147	0.0166598
1208	ENSMUSG00000018286	Psmb6	0.203552	0.00147081	0.0166598
1209	ENSMUSG00000040591	Cstpp1	0.511553	0.00147688	0.0167117
1210	ENSMUSG00000021420	Fars2	-0.322849	0.00147783	0.0167117
1211	ENSMUSG00000027556	Car1	0.965505	0.00148278	0.0167395
1212	ENSMUSG00000027011	Ube2e3	0.253203	0.00148204	0.0167395
1213	ENSMUSG00000007880	Arid1a	0.132934	0.00148395	0.0167395
1214	ENSMUSG00000025421	Hdhd2	-0.30245	0.00148958	0.0167891
1215	ENSMUSG00000001665	Gstt3	0.516512	0.00149096	0.0167908
1216	ENSMUSG00000041328	Pcf11	0.332371	0.00149511	0.0168143
1217	ENSMUSG00000009640	Dmap1	0.244901	0.0014955	0.0168143
1218	ENSMUSG00000029657	Hsph1	-0.819229	0.00150201	0.0168736
1219	ENSMUSG00000045064	Zc2hc1c	1.43244	0.00150432	0.0168823
1220	ENSMUSG00000021916	Glt8d1	0.212672	0.00150526	0.0168823
1221	ENSMUSG00000027739	Rab33b	0.399116	0.00151218	0.0169461
1222	ENSMUSG00000029195	Klb	0.780909	0.00151361	0.0169482
1223	ENSMUSG00000021905	Dph3	-0.251957	0.00151506	0.0169506
1224	ENSMUSG00000025903	Lypla1	-0.283691	0.00151911	0.0169821
1225	ENSMUSG00000048232	Fbxo10	0.404295	0.00152268	0.0169982
1226	ENSMUSG00000014195	Dnajc7	0.29145	0.00152304	0.0169982
1227	ENSMUSG00000091476	Catspere2	1.3139	0.0015253	0.0170095
1228	ENSMUSG00000000085	Scmh1	0.242755	0.00153461	0.0170594
1229	ENSMUSG00000033808	Tmem87a	0.217478	0.00153462	0.0170594
1230	ENSMUSG00000038084	Opa1	-0.316224	0.00153382	0.0170594
1231	ENSMUSG00000026678	Rgs5	-0.358438	0.00153476	0.0170594
1232	ENSMUSG00000044894	Uqcrq	-0.502389	0.00154033	0.0171074
1233	ENSMUSG00000043279	Trim56	-0.256791	0.00155319	0.0172362
1234	ENSMUSG00000039512	Uhrf1bp1	-0.341023	0.00155659	0.017246
1235	ENSMUSG00000043445	Pgp	-0.463607	0.00155646	0.017246
1236	ENSMUSG00000001891	Ugp2	-0.480155	0.00157209	0.0174036
1237	ENSMUSG00000029414	Kntc1	-1.04704	0.00157491	0.0174208
1238	ENSMUSG00000025503	Taldo1	-0.387048	0.00157634	0.0174225
1239	ENSMUSG00000025377	Tepsin	-0.353379	0.00158128	0.0174489
1240	ENSMUSG00000010538	Tsacc	-0.515039	0.00158072	0.0174489
1241	ENSMUSG00000022037	Clu	0.786306	0.00158637	0.0174769
1242	ENSMUSG00000054312	Mrps21	-0.296547	0.00158616	0.0174769
1243	ENSMUSG00000069206	Zfp874a	-0.37405	0.00158869	0.0174884
1244	ENSMUSG00000037686	Aspg	-1.21001	0.00159006	0.0174894
1245	ENSMUSG00000053070	Cfap300	0.565949	0.00159971	0.0175673
1246	ENSMUSG00000018677	Slc25a39	-0.299915	0.00159971	0.0175673
1247	ENSMUSG00000026500	Cox20	-0.400801	0.00160509	0.0176122
1248	ENSMUSG00000052459	Atp6v1a	-0.22796	0.00160797	0.0176296
1249	ENSMUSG00000078185	Chml	0.567017	0.00161084	0.017647
1250	ENSMUSG00000020962	Gtf2a1	0.214266	0.00161303	0.0176569
1251	ENSMUSG00000020773	Trim47	-0.649988	0.00161901	0.0177082
1252	ENSMUSG00000032525	Nktr	0.208789	0.00162162	0.0177225
1253	ENSMUSG00000038252	Ncapd2	-0.290166	0.00165629	0.018087
1254	ENSMUSG00000050240	Hic2	1.04407	0.00165788	0.0180899
1255	ENSMUSG00000024097	Srsf7	0.293551	0.0016656	0.0181597
1256	ENSMUSG00000074733	Zfp950	0.306046	0.00167735	0.0182541
1257	ENSMUSG00000022477	Aco2	-0.504341	0.00167826	0.0182541
1258	ENSMUSG00000036412	Arsi	-0.763846	0.00167796	0.0182541
1259	ENSMUSG00000026341	Actr3	-0.163378	0.00168086	0.0182678
1260	ENSMUSG00000036138	Acaa1a	0.336676	0.00168293	0.0182758
1261	ENSMUSG00000027752	Exosc8	0.289724	0.00169082	0.0183469
1262	ENSMUSG00000019362	D8Ertd738e	-0.260553	0.00169314	0.0183575
1263	ENSMUSG00000050288	Fzd2	0.584657	0.00170086	0.0184121
1264	ENSMUSG00000072772	Grcc10	-0.359896	0.0017005	0.0184121
1265	ENSMUSG00000006494	Pdk1	0.369418	0.00170418	0.0184335
1266	ENSMUSG00000062328	Rpl17	0.412011	0.0017088	0.0184587
1267	ENSMUSG00000013033	Adgrl1	0.294447	0.00171057	0.0184587
1268	ENSMUSG00000022885	St6gal1	-0.287642	0.00170942	0.0184587
1269	ENSMUSG00000002803	Btbd6	0.366094	0.00171839	0.0185285
1270	ENSMUSG00000050860	Phospho1	-0.5253	0.00171981	0.0185293
1271	ENSMUSG00000016487	Ppfibp1	0.433455	0.00172388	0.0185585
1272	ENSMUSG00000032606	Nicn1	0.191886	0.00172891	0.0185688
1273	ENSMUSG00000019873	Reep3	-0.197177	0.001727	0.0185688
1274	ENSMUSG00000022540	Rogdi	-0.380484	0.00172811	0.0185688
1275	ENSMUSG00000021356	Irf4	1.7546	0.00173124	0.0185792
1276	ENSMUSG00000033703	Fcsk	0.25542	0.00175222	0.0187896
1277	ENSMUSG00000014303	Glis2	-0.347997	0.00175538	0.0188088
1278	ENSMUSG00000032127	Vps11	0.209551	0.00176495	0.0188966
1279	ENSMUSG00000027490	E2f1	-0.592722	0.00176798	0.0188994
1280	ENSMUSG00000034656	Cacna1a	-0.774408	0.00176713	0.0188994
1281	ENSMUSG00000054519	Zfp867	0.513912	0.0017721	0.0189245
1282	ENSMUSG00000032216	Nedd4	0.170323	0.00177448	0.0189245
1283	ENSMUSG00000022244	Amacr	-0.410719	0.00177365	0.0189245
1284	ENSMUSG00000054342	Kcnn4	-0.955446	0.00177981	0.0189666
1285	ENSMUSG00000022564	Grina	0.417805	0.00178764	0.0190352
1286	ENSMUSG00000041168	Lonp1	-0.244329	0.00178921	0.0190372
1287	ENSMUSG00000059327	Eda	0.57393	0.00179228	0.019055
1288	ENSMUSG00000058927	Gm10053	-0.446791	0.00179568	0.0190763
1289	ENSMUSG00000026519	Tmem63a	0.514633	0.00180024	0.0190803
1290	ENSMUSG00000053819	Camk2d	0.223854	0.0017989	0.0190803
1291	ENSMUSG00000007837	Prrg2	-0.306376	0.0017977	0.0190803
1292	ENSMUSG00000000751	Rpa1	0.329231	0.00181315	0.0191935
1293	ENSMUSG00000052727	Map1b	-0.694167	0.00181373	0.0191935
1294	ENSMUSG00000024990	Rbp4	-0.94372	0.00182139	0.0192598
1295	ENSMUSG00000070709	Zfp974	-0.497167	0.00183564	0.0193954
1296	ENSMUSG00000024186	Rgs11	-1.08041	0.00183916	0.0194176
1297	ENSMUSG00000000346	Dazap2	0.18693	0.00184948	0.0195115
1298	ENSMUSG00000062012	Zfp13	0.556407	0.00185335	0.0195373
1299	ENSMUSG00000024359	Hspa9	-0.273236	0.00185827	0.019574
1300	ENSMUSG00000031095	Cul4b	0.286261	0.0018627	0.0195906
1301	ENSMUSG00000024997	Prdx3	-0.322628	0.00186176	0.0195906
1302	ENSMUSG00000022667	Cd200r1	-0.922811	0.00186473	0.0195968
1303	ENSMUSG00000039016	Timm8b	-0.272824	0.00186983	0.0196354
1304	ENSMUSG00000022772	Senp5	-0.217964	0.00188382	0.0197671
1305	ENSMUSG00000021270	Hsp90aa1	-0.544647	0.0018855	0.0197696
1306	ENSMUSG00000075528	Aarsd1	0.20469	0.00188995	0.019801
1307	ENSMUSG00000041498	Kif14	-1.11493	0.0019056	0.0199497
1308	ENSMUSG00000037095	Lrg1	-0.605595	0.00190785	0.019958
1309	ENSMUSG00000039463	Slc9a8	0.224612	0.00191945	0.0200641
1310	ENSMUSG00000042211	Fbxo38	0.183471	0.00192624	0.0201197
1311	ENSMUSG00000034187	Nsf	0.196768	0.00193487	0.0201943
1312	ENSMUSG00000029162	Khk	0.325802	0.00195062	0.0203277
1313	ENSMUSG00000025473	Adam8	-0.769552	0.00194929	0.0203277
1314	ENSMUSG00000084957	Bbip1	-0.317797	0.00196327	0.020444
1315	ENSMUSG00000062044	Lmtk3	1.04164	0.0019664	0.0204454
1316	ENSMUSG00000026039	Sgo2a	-0.777073	0.00196603	0.0204454
1317	ENSMUSG00000032116	Stt3a	0.155582	0.00197421	0.0205111
1318	ENSMUSG00000039682	Lap3	-0.20112	0.00197615	0.0205157
1319	ENSMUSG00000038332	Sesn1	0.380234	0.00198879	0.0206061
1320	ENSMUSG00000053329	Gatd3a	-0.399217	0.00198938	0.0206061
1321	ENSMUSG00000027961	Lrrc39	-0.733281	0.00198871	0.0206061
1322	ENSMUSG00000036528	Ppfibp2	0.51965	0.00200029	0.0207035
1323	ENSMUSG00000015501	Hivep2	-0.460582	0.00200542	0.0207409
1324	ENSMUSG00000021218	Gdi2	0.141492	0.00201217	0.0207792
1325	ENSMUSG00000031916	Cog8	-0.216827	0.00201124	0.0207792
1326	ENSMUSG00000030432	Rpl28	0.396264	0.00201622	0.0208054
1327	ENSMUSG00000041220	Elovl6	-0.525489	0.00201799	0.020808
1328	ENSMUSG00000019767	Ccdc170	0.743393	0.00202848	0.0209003
1329	ENSMUSG00000037112	Sik2	0.340185	0.00203124	0.020913
1330	ENSMUSG00000098332	Pigbos1	-0.386073	0.00203373	0.0209229
1331	ENSMUSG00000006717	Acot13	-0.446577	0.00204121	0.0209841
1332	ENSMUSG00000052214	Opa3	-0.234064	0.00205043	0.0210631
1333	ENSMUSG00000024974	Smc3	0.196833	0.00205369	0.0210807
1334	ENSMUSG00000032253	Phip	0.309375	0.00205625	0.0210912
1335	ENSMUSG00000042682	Selenok	0.200627	0.00206508	0.0211659
1336	ENSMUSG00000027351	Spred1	-0.35514	0.00207372	0.0212227
1337	ENSMUSG00000042109	Csdc2	-1.10195	0.0020736	0.0212227
1338	ENSMUSG00000034203	Chchd4	-0.250281	0.00208558	0.0213281
1339	ENSMUSG00000099032	Tcf24	1.06941	0.0020939	0.0213972
1340	ENSMUSG00000026623	Lpgat1	0.417648	0.00210007	0.0214289
1341	ENSMUSG00000028145	Them4	-0.33308	0.00210014	0.0214289
1342	ENSMUSG00000036242	Armh4	-0.538634	0.00210201	0.021432
1343	ENSMUSG00000038086	Hspb2	0.912875	0.00212278	0.0215999
1344	ENSMUSG00000022124	Fbxl3	0.298622	0.00212369	0.0215999
1345	ENSMUSG00000032311	Nrg4	-0.441479	0.00212479	0.0215999
1346	ENSMUSG00000032122	Slc37a2	-0.722255	0.00212056	0.0215999
1347	ENSMUSG00000001100	Poldip2	-0.28885	0.00212699	0.0216063
1348	ENSMUSG00000060402	Chst8	0.95789	0.00215209	0.0218127
1349	ENSMUSG00000046722	Cdc42se1	-0.28162	0.00215178	0.0218127
1350	ENSMUSG00000000628	Hk2	-0.899302	0.00215157	0.0218127
1351	ENSMUSG00000058638	Zfp110	0.196638	0.00216715	0.0219165
1352	ENSMUSG00000020111	Micu1	-0.136882	0.00216515	0.0219165
1353	ENSMUSG00000031133	Arhgef6	-0.284936	0.0021666	0.0219165
1354	ENSMUSG00000028673	Fuca1	0.238296	0.00217396	0.0219692
1355	ENSMUSG00000018415	Gid4	-0.315014	0.00218262	0.0220404
1356	ENSMUSG00000046330	Rpl37a	0.481378	0.00219259	0.0221211
1357	ENSMUSG00000031398	Plxna3	0.461222	0.00219644	0.0221211
1358	ENSMUSG00000021243	Fcf1	-0.231014	0.00219509	0.0221211
1359	ENSMUSG00000005575	Ube2m	-0.246848	0.00219708	0.0221211
1360	ENSMUSG00000031502	Col4a1	-0.385852	0.00220733	0.022208
1361	ENSMUSG00000031065	Cdk16	-0.219398	0.00220945	0.022213
1362	ENSMUSG00000020069	Hnrnph3	0.349648	0.00221511	0.0222536
1363	ENSMUSG00000042548	Asxl1	0.254855	0.00222317	0.0223181
1364	ENSMUSG00000030695	Aldoa	-0.285836	0.00223859	0.0224565
1365	ENSMUSG00000037742	Eef1a1	0.348759	0.0022426	0.0224701
1366	ENSMUSG00000022200	Golph3	-0.233398	0.00224324	0.0224701
1367	ENSMUSG00000002227	Mov10	0.296857	0.00224546	0.0224759
1368	ENSMUSG00000058886	Deaf1	0.346247	0.00225706	0.0225756
1369	ENSMUSG00000040139	9430038I01Rik	0.51184	0.00226271	0.0226155
1370	ENSMUSG00000022370	Mrpl13	-0.313499	0.00226971	0.0226689
1371	ENSMUSG00000105373	Gm42429	-2.09105	0.00227182	0.0226735
1372	ENSMUSG00000036111	Lmo1	-0.368946	0.0022786	0.0227245
1373	ENSMUSG00000045875	Adra1a	-0.595467	0.00228466	0.0227518
1374	ENSMUSG00000059022	Kcp	-0.691426	0.00228414	0.0227518
1375	ENSMUSG00000028341	Nr4a3	2.52951	0.00228842	0.0227561
1376	ENSMUSG00000078503	Zfp990	-0.812784	0.00228839	0.0227561
1377	ENSMUSG00000103677	Pcdhga4	0.578002	0.00230279	0.0228824
1378	ENSMUSG00000112920	Spata22	-0.715279	0.00230801	0.0229177
1379	ENSMUSG00000018322	Tomm34	0.256152	0.00231737	0.0229939
1380	ENSMUSG00000001424	Snd1	0.211771	0.00232049	0.0230082
1381	ENSMUSG00000031958	Ldhd	-0.380817	0.00233218	0.0231073
1382	ENSMUSG00000038156	Spon1	-0.430845	0.00233552	0.0231236
1383	ENSMUSG00000016382	Pls3	-0.193882	0.00235021	0.0232523
1384	ENSMUSG00000022948	Setd4	0.637002	0.00235499	0.0232828
1385	ENSMUSG00000038305	Spats2l	0.588457	0.00235963	0.0233118
1386	ENSMUSG00000063052	Lrrc40	0.2562	0.00238015	0.0234975
1387	ENSMUSG00000033308	Dpyd	0.50864	0.00238813	0.0235095
1388	ENSMUSG00000061136	Prpf40a	0.201309	0.00238933	0.0235095
1389	ENSMUSG00000022706	Mrpl40	-0.211813	0.00239167	0.0235095
1390	ENSMUSG00000028622	Mrpl37	-0.229989	0.00238801	0.0235095
1391	ENSMUSG00000064358	mt-Co3	-0.453682	0.00239077	0.0235095
1392	ENSMUSG00000029385	Ccng2	-0.840892	0.00239143	0.0235095
1393	ENSMUSG00000042570	Mier2	0.245886	0.00239715	0.0235465
1394	ENSMUSG00000052298	Cdc42se2	-0.239719	0.00241568	0.02371
1395	ENSMUSG00000037060	Cavin3	-0.599458	0.00241727	0.02371
1396	ENSMUSG00000053965	Pde5a	0.400803	0.00242417	0.0237267
1397	ENSMUSG00000063316	Rpl27	0.314939	0.00242276	0.0237267
1398	ENSMUSG00000073775	Kti12	-0.279373	0.0024236	0.0237267
1399	ENSMUSG00000020205	Phlda1	1.07894	0.00242591	0.0237268
1400	ENSMUSG00000031963	Bmper	-0.516588	0.00243442	0.023793
1401	ENSMUSG00000036825	Ssx2ip	-0.385644	0.0024458	0.0238871
1402	ENSMUSG00000042626	Shc1	0.28148	0.00244763	0.023888
1403	ENSMUSG00000029309	Sparcl1	-0.372923	0.00245626	0.0239551
1404	ENSMUSG00000026816	Gtf3c5	0.169925	0.00245875	0.0239623
1405	ENSMUSG00000024789	Jak2	-0.244638	0.00246676	0.0240232
1406	ENSMUSG00000055296	Tmem245	0.337864	0.00246959	0.0240338
1407	ENSMUSG00000055067	Smyd3	0.387506	0.002477	0.0240887
1408	ENSMUSG00000024238	Zeb1	-0.209462	0.00249033	0.0241668
1409	ENSMUSG00000038930	Rccd1	-0.223882	0.00248868	0.0241668
1410	ENSMUSG00000024533	Spire1	-0.225076	0.00248685	0.0241668
1411	ENSMUSG00000024926	Kat5	0.252439	0.00250118	0.0242549
1412	ENSMUSG00000024228	Nudt12	-0.429822	0.00250368	0.0242619
1413	ENSMUSG00000049404	Rarres1	-0.712299	0.00250802	0.0242868
1414	ENSMUSG00000042417	Ccno	1.23006	0.00251875	0.0243734
1415	ENSMUSG00000025417	Pip4k2c	0.22334	0.0025221	0.0243834
1416	ENSMUSG00000047123	Ticam1	-0.320739	0.00252334	0.0243834
1417	ENSMUSG00000039156	Stim2	-0.303691	0.00252751	0.0244052
1418	ENSMUSG00000018965	Ywhah	-0.305665	0.00252916	0.0244052
1419	ENSMUSG00000003410	Elavl3	-0.847856	0.00253276	0.0244227
1420	ENSMUSG00000030094	Xpc	0.279465	0.00253893	0.0244649
1421	ENSMUSG00000017264	Exosc10	0.214906	0.00254636	0.0245192
1422	ENSMUSG00000002332	Dhrs1	-0.228427	0.0025512	0.0245486
1423	ENSMUSG00000057229	Dmac2	0.312507	0.00255745	0.0245778
1424	ENSMUSG00000043140	Tmem186	-0.24019	0.00255783	0.0245778
1425	ENSMUSG00000005968	Tuft1	0.915698	0.00256747	0.0246358
1426	ENSMUSG00000038524	Fchsd1	0.287204	0.00256671	0.0246358
1427	ENSMUSG00000018861	Fdxr	-0.275856	0.00256948	0.0246379
1428	ENSMUSG00000020676	Ccl11	-0.467184	0.00258037	0.0247249
1429	ENSMUSG00000058740	Kcnt1	1.66586	0.00259299	0.0248285
1430	ENSMUSG00000048200	Cracr2b	0.668076	0.00259888	0.0248675
1431	ENSMUSG00000079555	Haus3	-0.377761	0.00260205	0.0248804
1432	ENSMUSG00000003762	Coq8b	-0.215124	0.00260409	0.0248826
1433	ENSMUSG00000060301	2610008E11Rik	0.276784	0.00261503	0.0249522
1434	ENSMUSG00000024772	Ehd1	-0.200542	0.00261406	0.0249522
1435	ENSMUSG00000047767	Atg16l2	-0.272313	0.00262284	0.0250093
1436	ENSMUSG00000045128	Rpl18a	0.411359	0.00262733	0.0250346
1437	ENSMUSG00000032757	Bet1	-0.263207	0.00264153	0.0251349
1438	ENSMUSG00000017929	B4galt5	-0.54764	0.00264058	0.0251349
1439	ENSMUSG00000055963	Triqk	0.546635	0.00264704	0.0251349
1440	ENSMUSG00000021548	Ccnh	0.201689	0.00264688	0.0251349
1441	ENSMUSG00000040018	Cox15	-0.257767	0.00264386	0.0251349
1442	ENSMUSG00000028973	Abcb8	-0.395734	0.00264931	0.025139
1443	ENSMUSG00000035064	Eef2k	0.555011	0.00265515	0.0251462
1444	ENSMUSG00000038733	Wdr26	-0.163361	0.00265557	0.0251462
1445	ENSMUSG00000039474	Wfs1	-0.371421	0.002652	0.0251462
1446	ENSMUSG00000036104	Rab3gap1	0.177647	0.0026596	0.0251669
1447	ENSMUSG00000022685	Parn	0.246341	0.00266886	0.025237
1448	ENSMUSG00000011958	Bnip2	-0.174151	0.00267365	0.0252649
1449	ENSMUSG00000103233	Gm37159	0.907597	0.00268012	0.0252737
1450	ENSMUSG00000050148	Ubqln2	0.265826	0.0026801	0.0252737
1451	ENSMUSG00000056698	Elmod3	-0.329785	0.00267831	0.0252737
1452	ENSMUSG00000031574	Star	0.765115	0.00271565	0.0255911
1453	ENSMUSG00000063511	Snrnp70	0.163312	0.00272325	0.0256451
1454	ENSMUSG00000030353	Tead4	0.457486	0.00273055	0.0256773
1455	ENSMUSG00000039043	Arpin	0.403594	0.00273059	0.0256773
1456	ENSMUSG00000021260	Hhipl1	-0.742571	0.0027323	0.0256773
1457	ENSMUSG00000079396	Gm3411	-1.80027	0.00273583	0.0256928
1458	ENSMUSG00000044700	Tmem201	0.320254	0.00273923	0.0257071
1459	ENSMUSG00000052748	Swt1	0.302204	0.00274935	0.0257843
1460	ENSMUSG00000075470	Alg10b	0.222512	0.00275161	0.0257879
1461	ENSMUSG00000028648	Ndufs5	-0.27962	0.00276917	0.0259346
1462	ENSMUSG00000000134	Tfe3	-0.160143	0.00277575	0.0259786
1463	ENSMUSG00000016559	H3f3b	0.340752	0.00278786	0.026074
1464	ENSMUSG00000026709	Dars2	-0.317625	0.00279055	0.0260814
1465	ENSMUSG00000018387	Shroom1	0.616667	0.00279751	0.0261286
1466	ENSMUSG00000021461	Fancc	0.305888	0.00281438	0.0262682
1467	ENSMUSG00000048126	Col6a3	-0.640592	0.00281641	0.0262692
1468	ENSMUSG00000040133	Gpr176	-1.08769	0.00282413	0.0263233
1469	ENSMUSG00000027995	Tlr2	-0.660546	0.00283314	0.0263893
1470	ENSMUSG00000056427	Slit3	0.488539	0.00285413	0.0265306
1471	ENSMUSG00000039701	Usp53	0.456124	0.00285341	0.0265306
1472	ENSMUSG00000038729	Pakap	-0.289395	0.00285296	0.0265306
1473	ENSMUSG00000057134	Ado	-0.270496	0.00286285	0.0265936
1474	ENSMUSG00000066442	Mthfs	-0.461058	0.00286807	0.026624
1475	ENSMUSG00000044991	Shld1	0.4393	0.0028775	0.0266754
1476	ENSMUSG00000024754	Cemip2	-0.279456	0.00287678	0.0266754
1477	ENSMUSG00000026283	Ing5	0.412328	0.00288229	0.0267017
1478	ENSMUSG00000026987	Baz2b	0.253087	0.00288638	0.0267215
1479	ENSMUSG00000035342	Lzts2	0.259927	0.00291037	0.0269254
1480	ENSMUSG00000029169	Dhx15	-0.172399	0.0029203	0.026999
1481	ENSMUSG00000086727	4931428L18Rik	-0.841889	0.00292796	0.0270515
1482	ENSMUSG00000027762	Sucnr1	0.639114	0.00295046	0.027232
1483	ENSMUSG00000027333	Smox	-0.365021	0.00295148	0.027232
1484	ENSMUSG00000041560	Nop53	0.332177	0.00295379	0.027235
1485	ENSMUSG00000068130	Zfp442	1.21522	0.00296444	0.0272833
1486	ENSMUSG00000034430	Zxdc	0.291161	0.00296952	0.0272833
1487	ENSMUSG00000021048	Mthfd1	0.240128	0.00297299	0.0272833
1488	ENSMUSG00000029203	Ube2k	-0.244254	0.00296553	0.0272833
1489	ENSMUSG00000038855	Itpkb	-0.278499	0.00297178	0.0272833
1490	ENSMUSG00000039529	Atp8b1	-0.484262	0.00296594	0.0272833
1491	ENSMUSG00000075394	Hoxc4	-0.563934	0.00296828	0.0272833
1492	ENSMUSG00000035125	Gcfc2	0.479854	0.00298401	0.0273661
1493	ENSMUSG00000027342	Pcna	0.254697	0.00299483	0.0274292
1494	ENSMUSG00000062078	Qki	-0.261142	0.0029949	0.0274292
1495	ENSMUSG00000010311	Optc	1.24746	0.00300123	0.0274493
1496	ENSMUSG00000038013	Wipf2	0.232252	0.00300312	0.0274493
1497	ENSMUSG00000025875	Tspan17	-0.321247	0.00300216	0.0274493
1498	ENSMUSG00000026516	Nvl	-0.224187	0.00300721	0.0274684
1499	ENSMUSG00000026527	Rgs7	-0.416001	0.00301793	0.0275296
1500	ENSMUSG00000034714	Ttyh2	-0.568654	0.00301769	0.0275296
1501	ENSMUSG00000072825	Cep170b	0.436175	0.00302096	0.0275388
1502	ENSMUSG00000021248	Tmed10	0.163704	0.00303014	0.0276042
1503	ENSMUSG00000031119	Gpc4	0.449471	0.00304059	0.0276517
1504	ENSMUSG00000027428	Rbbp9	0.226386	0.00304143	0.0276517
1505	ENSMUSG00000035150	Eif2s3x	0.190431	0.00303907	0.0276517
1506	ENSMUSG00000000560	Gabra2	-0.811889	0.00304863	0.0276988
1507	ENSMUSG00000001445	Mrpl10	-0.245896	0.00305096	0.0277016
1508	ENSMUSG00000018263	Tbx5	0.810493	0.00305562	0.0277207
1509	ENSMUSG00000022641	Bbx	0.240522	0.00305843	0.0277207
1510	ENSMUSG00000029156	Sgcb	-0.378456	0.00305914	0.0277207
1511	ENSMUSG00000036752	Tubb4b	-0.200337	0.00306463	0.0277521
1512	ENSMUSG00000030216	Wbp11	0.216044	0.00306858	0.0277694
1513	ENSMUSG00000047793	Sned1	0.306205	0.0030913	0.0279566
1514	ENSMUSG00000104063	Pcdhgb7	0.400231	0.0030964	0.0279842
1515	ENSMUSG00000052821	Cysltr1	0.665277	0.00310004	0.0279986
1516	ENSMUSG00000020085	Aifm2	0.271446	0.00311928	0.0281538
1517	ENSMUSG00000021379	Id4	0.586883	0.00312834	0.0282156
1518	ENSMUSG00000012443	Kif11	-0.865691	0.00313026	0.0282156
1519	ENSMUSG00000043051	Disc1	-0.574238	0.00317882	0.0286345
1520	ENSMUSG00000005899	Smpd4	0.17929	0.0031928	0.0287415
1521	ENSMUSG00000059070	Rpl18	0.323466	0.00321752	0.0289151
1522	ENSMUSG00000026309	Ilkap	0.18201	0.00321642	0.0289151
1523	ENSMUSG00000006262	Mob1b	-0.257685	0.00321843	0.0289151
1524	ENSMUSG00000061393	Acvr2b	0.526527	0.00322986	0.0289936
1525	ENSMUSG00000030733	Sh2b1	-0.213408	0.0032314	0.0289936
1526	ENSMUSG00000028158	Mttp	0.396577	0.00323903	0.0290293
1527	ENSMUSG00000025810	Nrp1	0.26842	0.00323962	0.0290293
1528	ENSMUSG00000026826	Nr4a2	1.03772	0.00326019	0.0291563
1529	ENSMUSG00000034664	Itga2b	0.652717	0.00325841	0.0291563
1530	ENSMUSG00000074406	Zfp628	0.349877	0.00325759	0.0291563
1531	ENSMUSG00000000171	Sdhd	-0.355047	0.00326242	0.0291572
1532	ENSMUSG00000019961	Tmpo	0.271004	0.003266	0.0291702
1533	ENSMUSG00000018411	Mapt	-0.599217	0.00327117	0.0291973
1534	ENSMUSG00000031980	Agt	1.35758	0.00328768	0.0293255
1535	ENSMUSG00000033917	Gde1	-0.374172	0.00329615	0.0293819
1536	ENSMUSG00000035799	Twist1	-0.386797	0.00330421	0.0294346
1537	ENSMUSG00000062157	Ifnlr1	1.281	0.0033094	0.0294546
1538	ENSMUSG00000031465	Angpt2	-0.799141	0.00331076	0.0294546
1539	ENSMUSG00000047712	Ust	-0.369263	0.00332475	0.0295598
1540	ENSMUSG00000011263	Exoc3l2	0.826316	0.00333647	0.0296255
1541	ENSMUSG00000028807	Zbtb8a	0.571485	0.00333489	0.0296255
1542	ENSMUSG00000021906	Oxnad1	-0.344605	0.00333974	0.0296353
1543	ENSMUSG00000025372	Baiap2	0.544129	0.00334781	0.0296685
1544	ENSMUSG00000022450	Ndufa6	-0.352177	0.0033463	0.0296685
1545	ENSMUSG00000003731	Kpna6	-0.204263	0.00335972	0.0297547
1546	ENSMUSG00000028909	Ptpru	0.546125	0.00336713	0.0298011
1547	ENSMUSG00000038550	Ciart	-0.620818	0.00337633	0.0298632
1548	ENSMUSG00000045868	Gvin1	-0.660922	0.00338537	0.0299237
1549	ENSMUSG00000078695	Cisd3	-0.391091	0.00339193	0.0299624
1550	ENSMUSG00000030795	Fus	0.440914	0.0033951	0.0299711
1551	ENSMUSG00000039501	Znfx1	-0.187808	0.0034021	0.0300135
1552	ENSMUSG00000016554	Eif3d	0.259502	0.00341052	0.0300684
1553	ENSMUSG00000025151	Maged1	0.255991	0.00341329	0.0300735
1554	ENSMUSG00000025646	Atrip	0.268892	0.00341726	0.030089
1555	ENSMUSG00000071632	2510002D24Rik	0.318459	0.00344217	0.0302889
1556	ENSMUSG00000051262	Nat8f3	1.86029	0.00345709	0.0304006
1557	ENSMUSG00000046186	Cd109	-0.798639	0.00346053	0.0304113
1558	ENSMUSG00000055762	Eef1d	0.273116	0.00346441	0.0304259
1559	ENSMUSG00000025169	Ogfod3	0.301712	0.00346671	0.0304266
1560	ENSMUSG00000017778	Cox7c	-0.289259	0.00350555	0.0307477
1561	ENSMUSG00000033902	Mapkbp1	0.383368	0.00351667	0.0308255
1562	ENSMUSG00000028911	Srsf4	0.240071	0.00353189	0.0309197
1563	ENSMUSG00000034593	Myo5a	-0.285485	0.00353193	0.0309197
1564	ENSMUSG00000040850	Psme4	-0.256714	0.00353442	0.0309217
1565	ENSMUSG00000024135	Srbd1	0.267113	0.00353779	0.0309314
1566	ENSMUSG00000032263	Bckdhb	-0.550138	0.00354237	0.0309516
1567	ENSMUSG00000040811	Eml2	0.298756	0.00355815	0.0310697
1568	ENSMUSG00000028719	Cmpk1	-0.19284	0.00357149	0.0311662
1569	ENSMUSG00000030987	Stim1	0.275917	0.00358277	0.0311751
1570	ENSMUSG00000032594	Ip6k1	0.269846	0.00358389	0.0311751
1571	ENSMUSG00000026718	Stam	-0.189348	0.00357562	0.0311751
1572	ENSMUSG00000039952	Dag1	-0.297222	0.00358264	0.0311751
1573	ENSMUSG00000052981	Ube2ql1	-1.2311	0.00358025	0.0311751
1574	ENSMUSG00000024039	Cbs	0.952164	0.00359724	0.0312347
1575	ENSMUSG00000072762	4930522L14Rik	0.831115	0.00359737	0.0312347
1576	ENSMUSG00000037375	Hhat	0.626756	0.00359759	0.0312347
1577	ENSMUSG00000091803	Cox16	-0.30782	0.00360101	0.0312445
1578	ENSMUSG00000019916	P4ha1	-0.578413	0.00360584	0.0312666
1579	ENSMUSG00000079610	Ankrd39	0.419771	0.00361252	0.0313047
1580	ENSMUSG00000028329	Xpa	-0.360536	0.00361733	0.0313265
1581	ENSMUSG00000008682	Rpl10	0.616281	0.00363412	0.0313925
1582	ENSMUSG00000030546	Plin1	0.26593	0.00362978	0.0313925
1583	ENSMUSG00000003955	Fam162a	-0.213254	0.00363288	0.0313925
1584	ENSMUSG00000024146	Cript	-0.226453	0.00363274	0.0313925
1585	ENSMUSG00000053559	Smagp	0.402766	0.00363786	0.031405
1586	ENSMUSG00000102813	Gm37795	0.655593	0.00364403	0.0314186
1587	ENSMUSG00000048138	Dmrt2	0.542497	0.00364198	0.0314186
1588	ENSMUSG00000020154	Ptprb	-0.205628	0.00365084	0.0314575
1589	ENSMUSG00000033429	Mcee	-0.359438	0.00366891	0.0315933
1590	ENSMUSG00000026608	Kctd3	0.236426	0.00367437	0.0316204
1591	ENSMUSG00000040188	Scamp2	0.197537	0.00368759	0.0317142
1592	ENSMUSG00000039021	Ttc16	0.835983	0.00369672	0.0317528
1593	ENSMUSG00000029922	Mkrn1	0.224153	0.00369539	0.0317528
1594	ENSMUSG00000068267	Cenpb	-0.236641	0.0037002	0.0317628
1595	ENSMUSG00000102018	Iqank1	0.909247	0.00372211	0.0319308
1596	ENSMUSG00000037243	Zfp692	0.224071	0.00372529	0.031938
1597	ENSMUSG00000029642	Polr1d	-0.239134	0.00373371	0.0319902
1598	ENSMUSG00000090862	Rps13	0.31357	0.00374421	0.0320601
1599	ENSMUSG00000078234	Klhdc7a	0.445912	0.00374717	0.0320654
1600	ENSMUSG00000048445	Ccdc57	0.505986	0.00375577	0.0320988
1601	ENSMUSG00000038462	Uqcrfs1	-0.374085	0.00375497	0.0320988
1602	ENSMUSG00000031879	Ciao2b	-0.246579	0.00375905	0.0321068
1603	ENSMUSG00000040016	Ptger3	-0.696792	0.00377317	0.0322073
1604	ENSMUSG00000031447	Lamp1	-0.173486	0.00378564	0.0322936
1605	ENSMUSG00000089736	Tgfbr3l	1.09205	0.00380899	0.0324725
1606	ENSMUSG00000024790	Sac3d1	-0.454283	0.00381418	0.0324966
1607	ENSMUSG00000028107	Tars2	-0.155973	0.00383278	0.0325941
1608	ENSMUSG00000025937	Lactb2	-0.249492	0.00382992	0.0325941
1609	ENSMUSG00000027673	Ndufb5	-0.290038	0.00383251	0.0325941
1610	ENSMUSG00000021814	Anxa7	0.287961	0.00384209	0.032653
1611	ENSMUSG00000023938	Aars2	-0.321957	0.00384704	0.0326748
1612	ENSMUSG00000041775	Mapk1ip1	0.493243	0.00386234	0.0327844
1613	ENSMUSG00000032398	Snapc5	-0.277165	0.00387504	0.0328718
1614	ENSMUSG00000054640	Slc8a1	0.950172	0.0038889	0.0329566
1615	ENSMUSG00000027998	Plrg1	0.218093	0.00388986	0.0329566
1616	ENSMUSG00000026112	Coa5	-0.280027	0.00389928	0.033016
1617	ENSMUSG00000041268	Dmxl2	0.2689	0.00390777	0.033047
1618	ENSMUSG00000048578	Mlec	-0.242812	0.00390746	0.033047
1619	ENSMUSG00000017404	Rpl19	0.265679	0.00392915	0.0331765
1620	ENSMUSG00000000378	Ccm2	-0.254012	0.00393036	0.0331765
1621	ENSMUSG00000032047	Acat1	-0.280249	0.00392808	0.0331765
1622	ENSMUSG00000026626	Ppp2r5a	-0.294665	0.00393801	0.0332001
1623	ENSMUSG00000041488	Stx3	-0.305718	0.00393712	0.0332001
1624	ENSMUSG00000075054	Yae1d1	-0.253566	0.00394173	0.033211
1625	ENSMUSG00000103715	4933431K14Rik	0.636389	0.00394662	0.0332318
1626	ENSMUSG00000025495	Ptdss2	-0.302058	0.00395403	0.0332736
1627	ENSMUSG00000061882	Ccdc62	0.632855	0.00397149	0.0334001
1628	ENSMUSG00000020083	Fam241b	0.647825	0.00398278	0.0334744
1629	ENSMUSG00000014786	Slc9a5	-0.464154	0.00399167	0.0335285
1630	ENSMUSG00000029591	Ung	-0.517753	0.00401086	0.0336691
1631	ENSMUSG00000066829	Zfp810	0.411779	0.00401411	0.0336757
1632	ENSMUSG00000043088	Il17re	0.565351	0.00403102	0.0337968
1633	ENSMUSG00000044405	Adig	-0.273259	0.00406253	0.0340402
1634	ENSMUSG00000004043	Stat5a	-0.400709	0.00407758	0.0341453
1635	ENSMUSG00000031214	Ophn1	0.40944	0.00409181	0.0342226
1636	ENSMUSG00000026586	Prrx1	-0.675949	0.0040899	0.0342226
1637	ENSMUSG00000044162	Tnip3	-1.26106	0.00409894	0.0342614
1638	ENSMUSG00000003810	Mast2	-0.264993	0.0041015	0.0342618
1639	ENSMUSG00000022629	Kif21a	0.299458	0.00410931	0.0343061
1640	ENSMUSG00000069806	Cacng7	0.562378	0.00412059	0.0343374
1641	ENSMUSG00000032175	Tyk2	0.170613	0.00411867	0.0343374
1642	ENSMUSG00000074793	Hspa12b	-0.321766	0.00411985	0.0343374
1643	ENSMUSG00000057897	Camk2b	-1.0678	0.00412667	0.0343671
1644	ENSMUSG00000022992	Kansl2	-0.172797	0.00414186	0.0344727
1645	ENSMUSG00000039943	Plcb4	-0.26084	0.00415806	0.0345864
1646	ENSMUSG00000023367	Tmem176a	0.533752	0.00416287	0.0346054
1647	ENSMUSG00000008604	Ubqln4	-0.176514	0.0041998	0.0348278
1648	ENSMUSG00000057789	Bak1	-0.296117	0.00419501	0.0348278
1649	ENSMUSG00000020190	Mknk2	-0.303209	0.00419737	0.0348278
1650	ENSMUSG00000040521	Tsfm	-0.326275	0.00419837	0.0348278
1651	ENSMUSG00000031504	Rab20	0.739729	0.00421379	0.0349226
1652	ENSMUSG00000027674	Pex5l	0.960461	0.00423006	0.0350362
1653	ENSMUSG00000010651	Acaa1b	-0.563113	0.00423321	0.0350411
1654	ENSMUSG00000024639	Gnaq	-0.167678	0.00424025	0.0350782
1655	ENSMUSG00000021786	Oxsm	-0.206613	0.00425973	0.0352181
1656	ENSMUSG00000067925	Rtl8a	0.43422	0.00426388	0.0352311
1657	ENSMUSG00000036186	Dipk1b	-0.793918	0.00426821	0.0352456
1658	ENSMUSG00000113902	Ndufb1	-0.308534	0.00427254	0.03526
1659	ENSMUSG00000020894	Vamp2	0.286772	0.00430372	0.035496
1660	ENSMUSG00000023886	Smoc2	-0.469098	0.0043097	0.0355238
1661	ENSMUSG00000007564	Ppp2r1a	0.263535	0.00431705	0.0355549
1662	ENSMUSG00000008859	Rala	-0.343735	0.00431866	0.0355549
1663	ENSMUSG00000062248	Cks2	-0.602572	0.00433045	0.0356305
1664	ENSMUSG00000110234	Gm45799	-0.583239	0.00433565	0.0356519
1665	ENSMUSG00000032042	Srpr	0.197411	0.00435679	0.0358042
1666	ENSMUSG00000024901	Peli3	0.362004	0.00437226	0.0358585
1667	ENSMUSG00000066232	Ipo7	-0.184366	0.00436914	0.0358585
1668	ENSMUSG00000020794	Ube2g1	-0.24741	0.00436704	0.0358585
1669	ENSMUSG00000024776	Stambpl1	-0.476856	0.00437388	0.0358585
1670	ENSMUSG00000056708	Ier5	0.566514	0.00439804	0.036035
1671	ENSMUSG00000121513	ENSMUSG00000121513	0.290866	0.0044508	0.0363528
1672	ENSMUSG00000040147	Maob	0.283156	0.00444924	0.0363528
1673	ENSMUSG00000025332	Kdm5c	-0.193033	0.00444245	0.0363528
1674	ENSMUSG00000020620	Abca8b	-0.430261	0.00445278	0.0363528
1675	ENSMUSG00000106743	Gm42847	-0.453229	0.00445166	0.0363528
1676	ENSMUSG00000054256	Msi1	-0.908312	0.00444556	0.0363528
1677	ENSMUSG00000026834	Acvr1c	0.436816	0.00446826	0.0364358
1678	ENSMUSG00000079508	Apoo	-0.359292	0.00446562	0.0364358
1679	ENSMUSG00000040339	Fam102b	0.544949	0.00447485	0.036446
1680	ENSMUSG00000090137	Uba52	0.259962	0.00447302	0.036446
1681	ENSMUSG00000022533	Atp13a3	-0.202087	0.00447767	0.0364473
1682	ENSMUSG00000058486	Wdr91	-0.414717	0.00448823	0.0365116
1683	ENSMUSG00000022415	Syngr1	-0.429465	0.00449957	0.0365622
1684	ENSMUSG00000020914	Top2a	-0.857075	0.0044998	0.0365622
1685	ENSMUSG00000021427	Ssr1	0.242266	0.00452634	0.0367561
1686	ENSMUSG00000037363	Letm2	0.445252	0.00454876	0.0369028
1687	ENSMUSG00000034424	Gcsh	-0.305997	0.00454981	0.0369028
1688	ENSMUSG00000043219	Hoxa6	0.835847	0.00455585	0.0369299
1689	ENSMUSG00000020808	Pimreg	-0.916384	0.00457798	0.0370873
1690	ENSMUSG00000040841	Six5	0.385777	0.00460099	0.0372296
1691	ENSMUSG00000036087	Slain2	-0.215131	0.00459878	0.0372296
1692	ENSMUSG00000031808	Slc27a1	0.556253	0.00460444	0.0372356
1693	ENSMUSG00000020457	Drg1	0.199295	0.0046103	0.0372609
1694	ENSMUSG00000006611	Hfe	-0.614955	0.00461755	0.0372975
1695	ENSMUSG00000042557	Sin3a	0.227646	0.00462516	0.037337
1696	ENSMUSG00000022485	Hoxc5	-0.647993	0.00464635	0.0374858
1697	ENSMUSG00000029321	Slc10a6	-0.79264	0.00465027	0.0374954
1698	ENSMUSG00000027177	Hipk3	0.473319	0.00466206	0.0375683
1699	ENSMUSG00000031442	Mcf2l	-0.523926	0.00466505	0.0375703
1700	ENSMUSG00000040652	Oaz2	-0.229511	0.00467815	0.0376536
1701	ENSMUSG00000022407	Adsl	0.193025	0.00470441	0.0378123
1702	ENSMUSG00000004451	Ralb	-0.262424	0.0047016	0.0378123
1703	ENSMUSG00000028339	Col15a1	-0.611755	0.00470615	0.0378123
1704	ENSMUSG00000047632	Fgfbp3	0.835102	0.00474075	0.0380198
1705	ENSMUSG00000042063	Zfp386	-0.29577	0.00474309	0.0380198
1706	ENSMUSG00000021102	Glrx5	-0.308306	0.00473919	0.0380198
1707	ENSMUSG00000003882	Il7r	-1.43315	0.00473569	0.0380198
1708	ENSMUSG00000020441	2310033P09Rik	0.266218	0.00477018	0.0382145
1709	ENSMUSG00000041712	Ubr7	-0.184625	0.00477478	0.0382289
1710	ENSMUSG00000021774	Ube2e1	0.206631	0.00479075	0.0383344
1711	ENSMUSG00000031755	Bbs2	0.266573	0.00482064	0.0385511
1712	ENSMUSG00000038256	Bcl9	0.274211	0.00484115	0.0386924
1713	ENSMUSG00000049823	Zbtb12	0.333024	0.00484578	0.0387068
1714	ENSMUSG00000016496	Cd274	-0.698894	0.00485445	0.0387535
1715	ENSMUSG00000054763	Defb42	-1.21671	0.00487109	0.0388636
1716	ENSMUSG00000015016	Acsf3	-0.341715	0.00489123	0.0390015
1717	ENSMUSG00000027799	Nbea	-0.429503	0.00490678	0.0391028
1718	ENSMUSG00000031841	Cdh13	-0.247157	0.00492115	0.0391489
1719	ENSMUSG00000023030	Slc11a2	-0.340123	0.00492085	0.0391489
1720	ENSMUSG00000038302	Afg1l	-0.351726	0.0049169	0.0391489
1721	ENSMUSG00000021221	Dpf3	-0.383778	0.0049303	0.0391989
1722	ENSMUSG00000027655	Dhx35	0.317072	0.0049389	0.0392445
1723	ENSMUSG00000027170	Eif3m	0.270158	0.0049482	0.0392955
1724	ENSMUSG00000013419	Zfp651	0.390644	0.00496707	0.0394225
1725	ENSMUSG00000028980	H6pd	0.372112	0.00497462	0.0394596
1726	ENSMUSG00000034135	Sik3	0.290033	0.0049803	0.0394817
1727	ENSMUSG00000032254	Kif23	-0.657451	0.00498486	0.039495
1728	ENSMUSG00000007892	Rplp1	0.380641	0.00499194	0.0395282
1729	ENSMUSG00000007867	Ift43	0.285086	0.00499976	0.0395672
1730	ENSMUSG00000064367	mt-Nd5	-0.371158	0.00504958	0.0399384
1731	ENSMUSG00000019826	Zbtb24	0.23209	0.00505294	0.0399418
1732	ENSMUSG00000048636	A730049H05Rik	1.25738	0.00506571	0.0400197
1733	ENSMUSG00000051169	Rpusd3	0.393968	0.00507352	0.0400583
1734	ENSMUSG00000050914	Ankrd37	-0.978949	0.00507853	0.0400747
1735	ENSMUSG00000002660	Clpp	-0.254707	0.00508462	0.0400997
1736	ENSMUSG00000031197	Vbp1	0.285943	0.00509992	0.0401879
1737	ENSMUSG00000026048	Ercc5	0.20028	0.00510168	0.0401879
1738	ENSMUSG00000043079	Synpo	0.542098	0.00512531	0.0403313
1739	ENSMUSG00000009281	Rarres2	-0.633138	0.00512579	0.0403313
1740	ENSMUSG00000028821	Syf2	0.170972	0.00515189	0.0404669
1741	ENSMUSG00000039126	Prune2	-0.57194	0.00515033	0.0404669
1742	ENSMUSG00000067279	Ppp1r3c	-0.867114	0.00514842	0.0404669
1743	ENSMUSG00000029413	Naaa	0.208217	0.00516691	0.0405616
1744	ENSMUSG00000020770	Unk	0.270936	0.00517583	0.0406083
1745	ENSMUSG00000004393	Ddx56	0.289989	0.00520509	0.0407983
1746	ENSMUSG00000032602	Slc25a20	-0.444892	0.00520601	0.0407983
1747	ENSMUSG00000034538	Zfp418	-0.552945	0.00521891	0.040876
1748	ENSMUSG00000035545	Leng8	0.189779	0.00524603	0.0410649
1749	ENSMUSG00000040174	Alkbh3	-0.355294	0.00526525	0.0411918
1750	ENSMUSG00000039760	Il22ra2	0.9861	0.00527237	0.0412004
1751	ENSMUSG00000034906	Ncaph	-0.651552	0.00527061	0.0412004
1752	ENSMUSG00000051316	Taf7	0.492897	0.00529336	0.0413408
1753	ENSMUSG00000021456	Fbp2	0.53769	0.00530438	0.0414032
1754	ENSMUSG00000021460	Auh	-0.286561	0.00532286	0.0415238
1755	ENSMUSG00000032305	Fam219b	0.228544	0.00534573	0.0416784
1756	ENSMUSG00000047030	Spata2	-0.226908	0.00534996	0.0416877
1757	ENSMUSG00000052751	Repin1	0.298502	0.00537187	0.0417906
1758	ENSMUSG00000024194	Cuta	-0.315224	0.00537112	0.0417906
1759	ENSMUSG00000037071	Scd1	-2.05788	0.00537233	0.0417906
1760	ENSMUSG00000014444	Piezo1	-0.369551	0.00538113	0.0418352
1761	ENSMUSG00000019942	Cdk1	-0.685793	0.0053903	0.0418827
1762	ENSMUSG00000048439	Nupl2	-0.36016	0.00540935	0.0420069
1763	ENSMUSG00000025358	Cdk2	0.248661	0.00541695	0.0420182
1764	ENSMUSG00000110256	Gm45412	-0.944915	0.00541531	0.0420182
1765	ENSMUSG00000000216	Scnn1g	1.88586	0.00542838	0.042083
1766	ENSMUSG00000028018	Gstcd	0.305148	0.0054511	0.0421874
1767	ENSMUSG00000041966	Dcaf17	0.242231	0.00545021	0.0421874
1768	ENSMUSG00000020253	Ppm1m	-0.499349	0.0054498	0.0421874
1769	ENSMUSG00000047656	Trpt1	0.297612	0.0054627	0.042237
1770	ENSMUSG00000038517	Tbkbp1	-0.324385	0.00546367	0.042237
1771	ENSMUSG00000038690	Atp5j2	-0.33856	0.00548225	0.0423311
1772	ENSMUSG00000059743	Fdps	-0.417264	0.00548512	0.0423311
1773	ENSMUSG00000030772	Dkk3	-0.475072	0.00548346	0.0423311
1774	ENSMUSG00000022285	Ywhaz	0.294797	0.00549874	0.0424122
1775	ENSMUSG00000021477	Ctsl	0.160205	0.00552759	0.0426107
1776	ENSMUSG00000028680	Plk3	1.0088	0.00553822	0.0426686
1777	ENSMUSG00000019952	Poc1b	0.218871	0.00554768	0.0427174
1778	ENSMUSG00000039105	Atp6v1g1	0.167781	0.00555355	0.0427386
1779	ENSMUSG00000102592	Gm38385	0.78102	0.00557183	0.0428552
1780	ENSMUSG00000003809	Gcdh	-0.378646	0.00559518	0.0430106
1781	ENSMUSG00000045968	Teddm2	0.825411	0.00560263	0.0430433
1782	ENSMUSG00000078784	Rbis	-0.240831	0.00560572	0.0430433
1783	ENSMUSG00000052144	Ppp4r2	-0.167109	0.00561159	0.0430641
1784	ENSMUSG00000078651	Aoc2	0.495682	0.0056163	0.0430762
1785	ENSMUSG00000028790	Khdrbs1	0.247241	0.00562088	0.0430871
1786	ENSMUSG00000033862	Cdk10	0.242258	0.00563531	0.0431606
1787	ENSMUSG00000004789	Dlst	-0.336436	0.00563678	0.0431606
1788	ENSMUSG00000036835	Psenen	-0.220311	0.00566258	0.043334
1789	ENSMUSG00000028398	Dmac1	-0.238194	0.00568769	0.0435018
1790	ENSMUSG00000053907	Mat2a	-0.284038	0.00572412	0.043756
1791	ENSMUSG00000002279	Lmf1	-0.302402	0.00574054	0.043857
1792	ENSMUSG00000026942	Traf2	-0.235281	0.00576145	0.0439835
1793	ENSMUSG00000021327	Zkscan3	-0.295179	0.00576353	0.0439835
1794	ENSMUSG00000028271	Gtf2b	0.257021	0.00578308	0.0441081
1795	ENSMUSG00000062647	Rpl7a	0.323497	0.00579785	0.0441961
1796	ENSMUSG00000037253	Mex3c	-0.167714	0.00580205	0.0442035
1797	ENSMUSG00000024042	Sik1	1.48599	0.00581379	0.0442652
1798	ENSMUSG00000032714	Syde1	0.199551	0.00582309	0.0442652
1799	ENSMUSG00000003352	Cacnb3	-0.341834	0.00582149	0.0442652
1800	ENSMUSG00000020092	Pald1	-0.439942	0.00582131	0.0442652
1801	ENSMUSG00000015023	Ddx19a	0.147668	0.00584111	0.0443775
1802	ENSMUSG00000070319	Eif3g	0.282554	0.00585272	0.0444411
1803	ENSMUSG00000034645	Zyg11a	0.866489	0.00586143	0.0444825
1804	ENSMUSG00000028393	Alad	0.336273	0.00587351	0.0445494
1805	ENSMUSG00000022299	Slc25a32	-0.323716	0.00589133	0.0446599
1806	ENSMUSG00000032062	2310030G06Rik	0.648351	0.0058975	0.0446819
1807	ENSMUSG00000026358	Rgs1	-1.13753	0.00590807	0.0447372
1808	ENSMUSG00000028811	Yars	-0.144902	0.00592173	0.0448004
1809	ENSMUSG00000032324	Tspan3	-0.254854	0.00592297	0.0448004
1810	ENSMUSG00000053846	Lipg	1.26816	0.00594274	0.0449003
1811	ENSMUSG00000030278	Cidec	0.529414	0.00594021	0.0449003
1812	ENSMUSG00000005506	Celf1	-0.132773	0.00594976	0.0449286
1813	ENSMUSG00000028035	Dnajb4	-0.398007	0.00596122	0.0449903
1814	ENSMUSG00000025868	Higd2a	-0.289665	0.00597434	0.0450644
1815	ENSMUSG00000022204	Ngdn	0.188404	0.00598455	0.0451166
1816	ENSMUSG00000054517	Trim65	-0.465769	0.00599054	0.0451369
1817	ENSMUSG00000029148	Nrbp1	0.12784	0.00601639	0.0452569
1818	ENSMUSG00000029173	Sepsecs	-0.241857	0.00601563	0.0452569
1819	ENSMUSG00000025408	Ddit3	-0.310979	0.00601248	0.0452569
1820	ENSMUSG00000034403	Pja1	0.264651	0.00603461	0.0453452
1821	ENSMUSG00000018585	Atox1	-0.400732	0.00603476	0.0453452
1822	ENSMUSG00000024044	Epb41l3	-0.436262	0.00604974	0.0454328
1823	ENSMUSG00000027335	Adra1d	0.458161	0.00606087	0.0454915
1824	ENSMUSG00000026820	Ptges2	-0.254029	0.00606932	0.0455299
1825	ENSMUSG00000032405	Pias1	0.177972	0.00607682	0.0455612
1826	ENSMUSG00000022111	Uchl3	-0.300892	0.00609675	0.0456856
1827	ENSMUSG00000062691	Cebpzos	-0.339391	0.00610118	0.0456937
1828	ENSMUSG00000054808	Actn4	0.334093	0.00611437	0.0457264
1829	ENSMUSG00000040354	Mars1	-0.189206	0.00611557	0.0457264
1830	ENSMUSG00000032350	Gclc	-0.190472	0.00611451	0.0457264
1831	ENSMUSG00000004031	Brinp2	-1.06846	0.00613179	0.0458226
1832	ENSMUSG00000041974	Spidr	0.235932	0.00614811	0.0459195
1833	ENSMUSG00000036327	Qsox2	0.172261	0.00620943	0.0463523
1834	ENSMUSG00000032671	A930018P22Rik	1.1612	0.00622039	0.0463582
1835	ENSMUSG00000024953	Prdx5	0.412479	0.00621975	0.0463582
1836	ENSMUSG00000029401	Rilpl2	-0.378595	0.00621501	0.0463582
1837	ENSMUSG00000039117	Taf4	0.195289	0.00625142	0.0464881
1838	ENSMUSG00000052997	Uba2	0.128939	0.00624756	0.0464881
1839	ENSMUSG00000039263	Npepl1	-0.176212	0.00625015	0.0464881
1840	ENSMUSG00000015672	Mrpl32	-0.188402	0.00624423	0.0464881
1841	ENSMUSG00002076083	Klhl17	0.315202	0.00626539	0.0464911
1842	ENSMUSG00000028104	Polr3gl	0.252135	0.00625701	0.0464911
1843	ENSMUSG00000025743	Sdc3	-0.263862	0.0062654	0.0464911
1844	ENSMUSG00000021508	Cxcl14	-0.465287	0.00626396	0.0464911
1845	ENSMUSG00000032329	Hmg20a	0.246938	0.00627717	0.0465279
1846	ENSMUSG00000040717	Il17rd	-0.360897	0.00627647	0.0465279
1847	ENSMUSG00000057329	Bcl2	0.469277	0.00628216	0.0465397
1848	ENSMUSG00000040681	Hmgn1	0.35942	0.0062964	0.04662
1849	ENSMUSG00000030669	Calca	1.23816	0.0063117	0.046708
1850	ENSMUSG00000003948	Mmd	0.220966	0.00632364	0.0467609
1851	ENSMUSG00000013822	Elof1	-0.195819	0.00633105	0.0467609
1852	ENSMUSG00000071266	Zfp946	-0.286784	0.00633252	0.0467609
1853	ENSMUSG00000001983	Taco1	-0.375966	0.00632692	0.0467609
1854	ENSMUSG00000016128	Stard13	0.323412	0.00634059	0.0467952
1855	ENSMUSG00000056692	Ilrun	-0.154311	0.00635578	0.046882
1856	ENSMUSG00000028138	Adh5	0.246339	0.00637136	0.0469211
1857	ENSMUSG00000005501	Usp40	-0.203849	0.00636885	0.0469211
1858	ENSMUSG00000060002	Chpt1	-0.321099	0.0063668	0.0469211
1859	ENSMUSG00000052364	B630019K06Rik	0.646354	0.00637603	0.0469302
1860	ENSMUSG00000022139	Mbnl2	-0.247146	0.00638433	0.0469661
1861	ENSMUSG00000024242	Map4k3	0.189215	0.00639424	0.0469884
1862	ENSMUSG00000072875	Gpr27	-0.844987	0.00639403	0.0469884
1863	ENSMUSG00000024286	Ccny	-0.21811	0.00640748	0.0470401
1864	ENSMUSG00000075467	Dnlz	-0.261227	0.00640816	0.0470401
1865	ENSMUSG00000022211	Carmil3	0.532067	0.0064267	0.0471257
1866	ENSMUSG00000037805	Rpl10a	0.377709	0.00642569	0.0471257
1867	ENSMUSG00000075256	Cerkl	-0.576366	0.00644083	0.047204
1868	ENSMUSG00000042312	S100a13	-0.212476	0.00645629	0.047292
1869	ENSMUSG00000023973	Cnpy3	0.183682	0.00647629	0.0474131
1870	ENSMUSG00000031297	Slc7a3	0.729127	0.00648352	0.0474153
1871	ENSMUSG00000066415	Msl2	0.18659	0.00648034	0.0474153
1872	ENSMUSG00000037685	Atp8a1	0.235728	0.00649736	0.0474911
1873	ENSMUSG00000034613	Ppm1h	-0.344415	0.00650708	0.0475368
1874	ENSMUSG00000057666	Gapdh	-0.237738	0.00652063	0.0476104
1875	ENSMUSG00000032271	Nnmt	0.90481	0.0065584	0.0478606
1876	ENSMUSG00000050229	Pigm	0.307757	0.00656287	0.0478677
1877	ENSMUSG00000090035	Galnt4	0.262384	0.00656706	0.0478727
1878	ENSMUSG00000018362	Kpna2	-0.426847	0.00657757	0.0479238
1879	ENSMUSG00000033004	Mycbp2	0.418931	0.00662291	0.0482285
1880	ENSMUSG00000030979	Uros	-0.335715	0.00663199	0.0482689
1881	ENSMUSG00000025283	Sat1	0.303105	0.00664816	0.0483126
1882	ENSMUSG00000039166	Akap7	0.269614	0.00665159	0.0483126
1883	ENSMUSG00000055407	Map6	-0.455033	0.00664471	0.0483126
1884	ENSMUSG00000049723	Mmp12	-1.02851	0.00665212	0.0483126
1885	ENSMUSG00000002341	Ncan	-1.32631	0.00666988	0.0484159
1886	ENSMUSG00000041949	Tango6	0.267254	0.00668461	0.0484971
1887	ENSMUSG00000029446	Psph	-0.490542	0.0066894	0.0485061
1888	ENSMUSG00000021895	Arhgef3	0.321633	0.00669571	0.0485262
1889	ENSMUSG00000043943	Naalad2	-0.411237	0.00671195	0.0486181
1890	ENSMUSG00000039328	Rnf122	0.468156	0.00672205	0.0486655
1891	ENSMUSG00000046699	Slitrk4	1.11059	0.00672755	0.0486795
1892	ENSMUSG00000026333	Gin1	-0.46653	0.00673373	0.0486986
1893	ENSMUSG00000035666	Gtf3c4	-0.187548	0.00673988	0.0487172
1894	ENSMUSG00000052593	Adam17	-0.17896	0.00677797	0.0489667
1895	ENSMUSG00000021635	Rad17	-0.238821	0.00680471	0.0491339
1896	ENSMUSG00000035356	Nfkbiz	0.446226	0.0068094	0.0491419
1897	ENSMUSG00000021186	Fbln5	1.09983	0.00681764	0.0491754
1898	ENSMUSG00000032526	Ss18l2	-0.311031	0.0068232	0.0491896
1899	ENSMUSG00000028567	Txndc12	-0.167793	0.00684449	0.049295
1900	ENSMUSG00000021037	Ahsa1	-0.297002	0.00684503	0.049295
1901	ENSMUSG00000051439	Cd14	0.552498	0.00686106	0.0493585
1902	ENSMUSG00000020634	Ubxn2a	-0.300749	0.00685978	0.0493585
1903	ENSMUSG00000061607	Mdc1	0.183431	0.00686627	0.0493701
1904	ENSMUSG00000037712	Fermt2	0.211711	0.0069403	0.0498761
1905	ENSMUSG00000031355	Arhgap6	0.47192	0.00695386	0.0499148
1906	ENSMUSG00000000811	Txnrd3	0.328658	0.00695119	0.0499148
1907	ENSMUSG00000022817	Itgb5	0.285286	0.00695662	0.0499148
1908	ENSMUSG00000104708	Gm42503	1.32303	0.00696248	0.0499306
1909	ENSMUSG00000042814	Mcts2	-0.308803	0.00696636	0.0499322
1910	ENSMUSG00000032199	Polr2m	-0.150844	0.00697882	0.0499954
