# Supplementary material for: LATS2 kinase integrates Hippo signalling with PPARγ repression to control brown adipocyte thermogenesis and systemic energy balance
Source: Research Square preprint supplement (doi:10.21203/rs.3.rs-7603529/v1), 2026-01-13
Supplement: Supplementary file 4 [file 9b58fb93496258a20b204ed7.xlsx]

## Sheet: Sheet1
Supplemental Table 2: List of differentially expressed genes in iBAT of Lats1&2fl/fl x Ucp1-CreER and control Lats1&2fl/fl mice (FDR<0.05)
Number	Gene ID	Gene name	Fold change (log2)	P value	FDR adjusted P
1	ENSMUSG00000035151	Elmod2	2.64085	1.05491e-121	1.68206e-117
2	ENSMUSG00000028713	Cyp4b1	1.68961	4.74799e-35	3.78534e-31
3	ENSMUSG00000022206	Npr3	2.55791	1.84965e-33	9.83088e-30
4	ENSMUSG00000018849	Wwc1	5.62077	1.74043e-32	6.93779e-29
5	ENSMUSG00000030605	Mfge8	1.02077	2.56242e-30	8.17156e-27
6	ENSMUSG00000040021	Lats1	-0.783982	1.4424e-29	3.83318e-26
7	ENSMUSG00000038065	Mturn	1.33749	1.79977e-29	4.09962e-26
8	ENSMUSG00000032332	Col12a1	1.71218	4.82748e-25	9.62176e-22
9	ENSMUSG00000018339	Gpx3	1.05828	7.99705e-25	1.41681e-21
10	ENSMUSG00000021411	Pxdc1	1.56922	3.47564e-24	5.5419e-21
11	ENSMUSG00000032401	Lctl	2.34393	1.85137e-23	2.68365e-20
12	ENSMUSG00000025511	Tspan4	1.24391	4.2391e-22	5.6327e-19
13	ENSMUSG00000018398	Septin8	0.952838	3.5578e-20	4.36378e-17
14	ENSMUSG00000025993	Slc40a1	1.40481	3.88797e-20	4.42812e-17
15	ENSMUSG00000021313	Ryr2	2.63563	1.39621e-18	1.48417e-15
16	ENSMUSG00000040562	Gstm2	1.21893	2.30901e-18	2.30107e-15
17	ENSMUSG00000041734	Kirrel	1.64583	4.30495e-18	4.03779e-15
18	ENSMUSG00000051236	Msrb3	1.13588	1.1874e-17	1.05184e-14
19	ENSMUSG00000118671	Eppk1	2.6279	9.46753e-17	7.94525e-14
20	ENSMUSG00000041737	Tmem45b	1.37681	1.84561e-16	1.47142e-13
21	ENSMUSG00000016128	Stard13	0.809016	2.951e-16	2.24065e-13
22	ENSMUSG00000038366	Lasp1	0.995385	1.98245e-15	1.43682e-12
23	ENSMUSG00000029718	Pcolce	1.61284	2.37663e-15	1.64762e-12
24	ENSMUSG00000019278	Dpep1	1.23924	4.1167e-15	2.73503e-12
25	ENSMUSG00000024646	Cyb5a	0.658965	1.15753e-14	7.38276e-12
26	ENSMUSG00000033585	Ndn	0.78764	1.23184e-14	7.55448e-12
27	ENSMUSG00000028553	Angptl3	-2.01742	1.46202e-14	8.63405e-12
28	ENSMUSG00000034006	Slc66a2	0.92867	1.98469e-14	1.13021e-11
29	ENSMUSG00000059751	Rps3a3	-4.99384	3.06352e-14	1.68441e-11
30	ENSMUSG00000057561	Eif1a	1.01275	3.63063e-14	1.92968e-11
31	ENSMUSG00000038618	Rassf7	2.19822	4.06914e-14	2.09298e-11
32	ENSMUSG00000041577	Prelp	1.10071	6.76572e-14	3.37123e-11
33	ENSMUSG00000018340	Anxa6	0.423015	3.10352e-13	1.49956e-10
34	ENSMUSG00000040339	Fam102b	1.03313	3.23171e-13	1.51558e-10
35	ENSMUSG00000036913	Trim67	0.903347	3.52686e-13	1.60674e-10
36	ENSMUSG00000030541	Idh2	0.552707	4.52604e-13	2.00466e-10
37	ENSMUSG00000062611	Rps3a2	-4.26013	5.2874e-13	2.27858e-10
38	ENSMUSG00000089774	Slc5a3	0.904412	5.86771e-13	2.46212e-10
39	ENSMUSG00000019945	Cabcoco1	-0.89978	1.89138e-12	7.73284e-10
40	ENSMUSG00000115846	Gm41144	2.31556	2.99035e-12	1.19203e-09
41	ENSMUSG00000025348	Itga7	0.929262	6.13013e-12	2.38402e-09
42	ENSMUSG00000069833	Ahnak	1.08942	7.93742e-12	3.01338e-09
43	ENSMUSG00000039234	Sec24d	0.640046	9.63803e-12	3.54078e-09
44	ENSMUSG00000044674	Fzd1	1.27051	9.77074e-12	3.54078e-09
45	ENSMUSG00000002104	Rapsn	2.75642	1.1734e-11	4.15775e-09
46	ENSMUSG00000120913	ENSMUSG00000120913	1.97249	1.2699e-11	4.40185e-09
47	ENSMUSG00000029446	Psph	-0.522805	1.95663e-11	6.63796e-09
48	ENSMUSG00000073460	Pnldc1	1.12109	3.09538e-11	1.02825e-08
49	ENSMUSG00000032714	Syde1	0.848498	3.61741e-11	1.16466e-08
50	ENSMUSG00000031904	Slc7a6	0.748866	3.65211e-11	1.16466e-08
51	ENSMUSG00000024120	Lrpprc	-0.359647	6.30689e-11	1.97183e-08
52	ENSMUSG00000059022	Kcp	-0.946681	8.79265e-11	2.69613e-08
53	ENSMUSG00000037706	Cd81	0.387578	9.01677e-11	2.71269e-08
54	ENSMUSG00000026112	Coa5	-0.275174	1.85821e-10	5.48689e-08
55	ENSMUSG00000057715	A830018L16Rik	-0.79926	1.9347e-10	5.60888e-08
56	ENSMUSG00000079057	Cyp4v3	0.643735	2.14525e-10	6.10821e-08
57	ENSMUSG00000111548	Gm8162	2.07974	2.48123e-10	6.94092e-08
58	ENSMUSG00000017765	Slc12a4	0.818399	2.54957e-10	7.00913e-08
59	ENSMUSG00000082361	Btc	1.56506	2.59848e-10	7.02251e-08
60	ENSMUSG00000024065	Ehd3	0.947859	3.46256e-10	9.20176e-08
61	ENSMUSG00000020627	Klhl29	1.40855	4.4507e-10	1.16338e-07
62	ENSMUSG00000039157	Fam102a	0.825693	6.15852e-10	1.58383e-07
63	ENSMUSG00000032733	Snx33	0.97659	6.30746e-10	1.59639e-07
64	ENSMUSG00000037712	Fermt2	0.463366	7.78599e-10	1.93981e-07
65	ENSMUSG00000007872	Id3	1.03505	8.98799e-10	2.20482e-07
66	ENSMUSG00000025574	Tk1	1.16157	9.39061e-10	2.26869e-07
67	ENSMUSG00000075254	Heg1	0.564242	9.84673e-10	2.34337e-07
68	ENSMUSG00000032038	St3gal4	0.660376	1.03941e-09	2.43727e-07
69	ENSMUSG00000028556	Dock7	-0.817548	1.05745e-09	2.44362e-07
70	ENSMUSG00000086332	4930480G23Rik	5.78742	1.41846e-09	3.23106e-07
71	ENSMUSG00000041957	Pkp2	0.905972	1.62436e-09	3.64794e-07
72	ENSMUSG00000024529	Lox	0.973729	2.09292e-09	4.63495e-07
73	ENSMUSG00000026623	Lpgat1	0.711692	2.23093e-09	4.80705e-07
74	ENSMUSG00000058013	Septin11	0.581533	2.20188e-09	4.80705e-07
75	ENSMUSG00000056665	Them6	0.79345	2.9803e-09	6.33612e-07
76	ENSMUSG00000032531	Amotl2	0.984799	4.0357e-09	8.46701e-07
77	ENSMUSG00000075590	Nrbp2	0.614256	4.08937e-09	8.46818e-07
78	ENSMUSG00000026626	Ppp2r5a	-0.339873	4.66458e-09	9.53548e-07
79	ENSMUSG00000052911	Lamb2	0.419358	4.73671e-09	9.56036e-07
80	ENSMUSG00000019883	Echdc1	-0.518061	4.92599e-09	9.81811e-07
81	ENSMUSG00000003526	Prodh	0.766266	5.32086e-09	1.04742e-06
82	ENSMUSG00000017639	Rab11fip4	1.48416	5.87914e-09	1.14321e-06
83	ENSMUSG00000008393	Carhsp1	-0.364752	6.08527e-09	1.16903e-06
84	ENSMUSG00000026170	Cyp27a1	0.476692	6.34475e-09	1.1902e-06
85	ENSMUSG00000023905	Tnfrsf12a	0.648523	6.2871e-09	1.1902e-06
86	ENSMUSG00000099349	1700047G03Rik	2.60783	8.54513e-09	1.58433e-06
87	ENSMUSG00000105746	Gm43595	1.60579	9.2281e-09	1.69129e-06
88	ENSMUSG00000050052	Tdrp	0.769257	9.64669e-09	1.74791e-06
89	ENSMUSG00000031996	Aplp2	0.50152	1.0811e-08	1.93688e-06
90	ENSMUSG00000032060	Cryab	2.39051	1.201e-08	2.12778e-06
91	ENSMUSG00000115391	Gm49123	1.44765	1.35616e-08	2.37627e-06
92	ENSMUSG00000058793	Cds2	0.634269	1.43231e-08	2.48241e-06
93	ENSMUSG00000024664	Fads3	1.93161	1.72406e-08	2.95593e-06
94	ENSMUSG00000001663	Gstt1	0.755196	2.00984e-08	3.40924e-06
95	ENSMUSG00000034917	Tjp3	-1.20809	2.148e-08	3.60525e-06
96	ENSMUSG00000026781	Acbd5	-0.31616	2.27914e-08	3.78552e-06
97	ENSMUSG00000025220	Oga	-0.44371	2.37156e-08	3.89841e-06
98	ENSMUSG00000093661	Eif4e3	-0.342402	2.44461e-08	3.97748e-06
99	ENSMUSG00000025237	Parp6	-0.32289	2.53453e-08	4.08213e-06
100	ENSMUSG00000020534	Shmt1	-0.620404	3.13519e-08	4.99907e-06
101	ENSMUSG00000027931	Npr1	0.804713	3.78751e-08	5.97938e-06
102	ENSMUSG00000004264	Phb2	-0.302282	4.16255e-08	6.50704e-06
103	ENSMUSG00000028229	Rmdn1	-0.449778	4.51014e-08	6.98196e-06
104	ENSMUSG00000027272	Ubr1	0.486707	4.98901e-08	7.64901e-06
105	ENSMUSG00000040174	Alkbh3	-0.395145	5.5266e-08	8.31337e-06
106	ENSMUSG00000037669	Ldah	-0.275291	5.48905e-08	8.31337e-06
107	ENSMUSG00000031778	Cx3cl1	1.15018	5.72945e-08	8.53795e-06
108	ENSMUSG00000052698	Tln2	0.642704	5.79417e-08	8.55445e-06
109	ENSMUSG00000028402	Mpdz	0.510223	6.1574e-08	9.00732e-06
110	ENSMUSG00000025503	Taldo1	-0.459891	6.54141e-08	9.48207e-06
111	ENSMUSG00000020459	Mtif2	-0.32128	6.64006e-08	9.53835e-06
112	ENSMUSG00000043162	Pyurf	-0.450515	7.19275e-08	1.024e-05
113	ENSMUSG00000030934	Oat	0.529135	7.64865e-08	1.07927e-05
114	ENSMUSG00000000567	Sox9	2.02905	9.04515e-08	1.25413e-05
115	ENSMUSG00000024335	Brd2	0.241767	9.01394e-08	1.25413e-05
116	ENSMUSG00000053199	Arhgap20	1.96912	9.62107e-08	1.32248e-05
117	ENSMUSG00000033361	Prrg3	1.09508	9.94284e-08	1.35503e-05
118	ENSMUSG00000037833	Sh2d4b	2.54472	1.05416e-07	1.42445e-05
119	ENSMUSG00000022178	Ajuba	0.652023	1.07409e-07	1.43919e-05
120	ENSMUSG00000020264	Slc36a2	-0.288551	1.09829e-07	1.45935e-05
121	ENSMUSG00000003534	Ddr1	0.766901	1.14911e-07	1.51426e-05
122	ENSMUSG00000031709	Tbc1d9	0.852883	1.21641e-07	1.5898e-05
123	ENSMUSG00000021012	Zc3h14	-0.372612	1.29803e-07	1.68269e-05
124	ENSMUSG00000021748	Pdhb	-0.400003	1.38373e-07	1.77932e-05
125	ENSMUSG00000087679	Tmem250-ps	-0.309632	1.54089e-07	1.96556e-05
126	ENSMUSG00000070371	Prss36	0.638035	1.61149e-07	2.0393e-05
127	ENSMUSG00000029096	Htra3	0.62881	1.6794e-07	2.1085e-05
128	ENSMUSG00000028127	Abcd3	-0.303221	1.76289e-07	2.19604e-05
129	ENSMUSG00000019864	Rtn4ip1	-0.352575	1.87174e-07	2.31356e-05
130	ENSMUSG00000026582	Sele	2.6921	1.96071e-07	2.40488e-05
131	ENSMUSG00000003528	Slc25a1	-0.527871	2.16051e-07	2.62972e-05
132	ENSMUSG00000052957	Gas1	0.610338	2.30109e-07	2.77962e-05
133	ENSMUSG00000031351	Zfp185	1.02098	2.34942e-07	2.81665e-05
134	ENSMUSG00000030770	Parva	0.463774	2.49667e-07	2.97086e-05
135	ENSMUSG00000022091	Sorbs3	0.557639	2.646e-07	3.12522e-05
136	ENSMUSG00000022419	Deptor	0.572237	2.80431e-07	3.28785e-05
137	ENSMUSG00000067786	Nnat	1.11951	2.95142e-07	3.41018e-05
138	ENSMUSG00000049327	Kmt5a	-0.386442	2.93038e-07	3.41018e-05
139	ENSMUSG00000032418	Me1	-0.733969	2.98467e-07	3.42295e-05
140	ENSMUSG00000022309	Angpt1	0.903008	3.00542e-07	3.42295e-05
141	ENSMUSG00000032602	Slc25a20	-0.396264	3.11644e-07	3.52422e-05
142	ENSMUSG00000060459	Kng2	0.590756	3.32605e-07	3.73477e-05
143	ENSMUSG00000002289	Angptl4	1.64976	3.38632e-07	3.77586e-05
144	ENSMUSG00000063884	Ptcd3	-0.286009	3.86367e-07	4.27821e-05
145	ENSMUSG00000028776	Tinagl1	0.612709	3.89416e-07	4.28223e-05
146	ENSMUSG00000029998	Pcyox1	-0.344046	4.09554e-07	4.47284e-05
147	ENSMUSG00000026172	Bcs1l	-0.312104	4.29083e-07	4.62279e-05
148	ENSMUSG00000074884	Serf2	-0.407937	4.27544e-07	4.62279e-05
149	ENSMUSG00000065954	Tacc1	0.396519	4.87516e-07	5.21708e-05
150	ENSMUSG00000073988	Ttpa	0.904195	4.95474e-07	5.232e-05
151	ENSMUSG00000023861	Mpc1	-0.407007	4.95037e-07	5.232e-05
152	ENSMUSG00000029221	Slc30a9	-0.258646	5.13314e-07	5.38474e-05
153	ENSMUSG00000098557	Kctd12	0.554018	5.27366e-07	5.49598e-05
154	ENSMUSG00000022136	Dnajc3	0.346737	5.34378e-07	5.5329e-05
155	ENSMUSG00000029287	Tgfbr3	0.584504	5.53049e-07	5.68927e-05
156	ENSMUSG00000057738	Sptan1	0.35986	5.61851e-07	5.74277e-05
157	ENSMUSG00000078429	Ctdsp2	0.405159	5.82489e-07	5.91579e-05
158	ENSMUSG00000031448	Adprhl1	-1.21007	5.9599e-07	6.0146e-05
159	ENSMUSG00000040966	Slc22a2	1.03309	6.1341e-07	6.15146e-05
160	ENSMUSG00000028636	Ppcs	-0.360907	6.67007e-07	6.64714e-05
161	ENSMUSG00000091811	Inafm1	-0.615648	6.86346e-07	6.79739e-05
162	ENSMUSG00000041733	Coq5	-0.413419	7.91817e-07	7.79354e-05
163	ENSMUSG00000032348	Gsta4	-0.424337	9.145e-07	8.89129e-05
164	ENSMUSG00000000253	Gmpr	1.11389	9.10511e-07	8.89129e-05
165	ENSMUSG00000031357	Syap1	0.399704	9.41554e-07	9.09884e-05
166	ENSMUSG00000033161	Atp1a1	0.526397	1.02159e-06	9.81282e-05
167	ENSMUSG00000003228	Grk5	0.439335	1.10178e-06	0.000105197
168	ENSMUSG00000038009	Dnajc22	-1.03989	1.13039e-06	0.000107286
169	ENSMUSG00000000168	Dlat	-0.304964	1.17982e-06	0.000111315
170	ENSMUSG00000024713	Pcsk5	0.614829	1.22524e-06	0.00011492
171	ENSMUSG00000020268	Lyrm7	-0.344916	1.26492e-06	0.000117949
172	ENSMUSG00000031903	Pla2g15	0.535667	1.34492e-06	0.000124679
173	ENSMUSG00000025810	Nrp1	0.41368	1.52848e-06	0.000140877
174	ENSMUSG00000034424	Gcsh	-0.312933	1.56473e-06	0.000142569
175	ENSMUSG00000032381	Ciao2a	-0.339595	1.56337e-06	0.000142569
176	ENSMUSG00000038244	Mical2	-0.578896	1.68664e-06	0.000151087
177	ENSMUSG00000022574	Naprt	-0.511931	1.66869e-06	0.000151087
178	ENSMUSG00000024395	Lims2	0.542115	1.68193e-06	0.000151087
179	ENSMUSG00000037656	Slc20a2	0.493509	1.71922e-06	0.000151453
180	ENSMUSG00000021591	Glrx	0.470421	1.71437e-06	0.000151453
181	ENSMUSG00000049521	Cdc42ep1	0.423824	1.71462e-06	0.000151453
182	ENSMUSG00000073888	Ccl27a	-0.377439	1.80569e-06	0.000158196
183	ENSMUSG00000001420	Tmem79	-0.630536	1.82789e-06	0.000159266
184	ENSMUSG00000037111	Setd7	0.623357	1.93566e-06	0.00016774
185	ENSMUSG00000074364	Ehd2	0.427528	1.97186e-06	0.000169953
186	ENSMUSG00000034235	Usp54	0.613711	2.18219e-06	0.00018707
187	ENSMUSG00000115338	Pnp	0.498493	2.43309e-06	0.000207463
188	ENSMUSG00000040105	Plpp6	-0.374755	2.59177e-06	0.000219818
189	ENSMUSG00000021361	Tmem14c	-0.420638	2.62788e-06	0.000221701
190	ENSMUSG00000026492	Tfb2m	-0.284553	2.64594e-06	0.00022205
191	ENSMUSG00000003464	Pex19	-0.238534	2.88302e-06	0.000240679
192	ENSMUSG00000006019	Dhx34	-0.528794	2.96698e-06	0.000246398
193	ENSMUSG00000040724	Kcna2	1.22074	3.05124e-06	0.000252083
194	ENSMUSG00000024981	Acsl5	-0.804796	3.12174e-06	0.000256578
195	ENSMUSG00000039763	Dnajc28	-0.322362	3.15298e-06	0.000257817
196	ENSMUSG00000091498	Mpc1-ps	-0.318622	3.32784e-06	0.000270727
197	ENSMUSG00000036580	Spg20	0.422208	3.36505e-06	0.000272364
198	ENSMUSG00000031449	Atp4b	-0.77184	3.48357e-06	0.000280533
199	ENSMUSG00000027709	Mccc1	-0.324058	3.53066e-06	0.000281482
200	ENSMUSG00000027978	Prss12	1.80103	3.52588e-06	0.000281482
201	ENSMUSG00000017774	Myo1c	0.308785	3.73843e-06	0.000296563
202	ENSMUSG00000023959	Clic5	0.405326	4.16706e-06	0.00032893
203	ENSMUSG00000027605	Acss2	-0.616185	4.23265e-06	0.000332461
204	ENSMUSG00000045672	Col27a1	0.805749	4.32427e-06	0.000337992
205	ENSMUSG00000047409	Ctdspl	0.48165	4.49999e-06	0.000350012
206	ENSMUSG00000056698	Elmod3	-0.315039	4.61168e-06	0.000355233
207	ENSMUSG00000003868	Ruvbl2	-0.296925	4.61024e-06	0.000355233
208	ENSMUSG00000043252	Tmem64	0.486379	4.76116e-06	0.000364984
209	ENSMUSG00000025203	Scd2	-0.607804	4.79632e-06	0.000365921
210	ENSMUSG00000085704	4921531C22Rik	-0.42997	4.90317e-06	0.000372291
211	ENSMUSG00000029752	Asns	-0.231787	5.07785e-06	0.000383727
212	ENSMUSG00000000339	Rtca	-0.319983	5.19204e-06	0.000390505
213	ENSMUSG00000006784	Odad4	-0.785602	5.27141e-06	0.000394613
214	ENSMUSG00000022634	Yaf2	-0.267087	5.45089e-06	0.000406142
215	ENSMUSG00000027774	Gfm1	-0.323616	5.78074e-06	0.000428514
216	ENSMUSG00000029050	Ski	0.504831	5.85864e-06	0.000428514
217	ENSMUSG00000041632	Mrps27	-0.307249	5.85112e-06	0.000428514
218	ENSMUSG00000021069	Pygl	-0.34256	5.82247e-06	0.000428514
219	ENSMUSG00000031555	Adam9	0.304536	6.04742e-06	0.000440302
220	ENSMUSG00000028949	Smarcd3	0.684068	6.22536e-06	0.000449155
221	ENSMUSG00000002265	Peg3	0.710149	6.20716e-06	0.000449155
222	ENSMUSG00000028630	Dyrk2	0.428451	6.4412e-06	0.000460561
223	ENSMUSG00000024695	Zfp91	-0.305382	6.41441e-06	0.000460561
224	ENSMUSG00000002015	Bcap31	-0.300055	6.81447e-06	0.000485075
225	ENSMUSG00000025069	Gsto2	-0.498007	6.84682e-06	0.000485211
226	ENSMUSG00000031826	Usp10	-0.610139	6.89684e-06	0.000486594
227	ENSMUSG00000031400	G6pdx	-0.343119	7.34175e-06	0.000515701
228	ENSMUSG00000032067	Pts	-0.304254	7.43318e-06	0.000519834
229	ENSMUSG00000072949	Acot1	-0.881468	7.49013e-06	0.000521529
230	ENSMUSG00000052926	Rnaseh2a	0.556691	7.83708e-06	0.000543314
231	ENSMUSG00000040370	Etfrf1	-0.308932	7.97276e-06	0.000550327
232	ENSMUSG00000027506	Tpd52	-0.464278	8.19385e-06	0.00056315
233	ENSMUSG00000021417	Eci2	-0.243884	8.26519e-06	0.000565615
234	ENSMUSG00000040385	Ppp1ca	-0.266158	8.66513e-06	0.000590451
235	ENSMUSG00000090622	A930033H14Rik	-0.628671	8.92876e-06	0.000605826
236	ENSMUSG00000035385	Ccl2	3.03723	9.02633e-06	0.000607278
237	ENSMUSG00000021550	2210016F16Rik	-0.282015	9.01381e-06	0.000607278
238	ENSMUSG00000040249	Lrp1	0.52062	9.17245e-06	0.000614516
239	ENSMUSG00000022244	Amacr	-0.338664	9.45818e-06	0.000631007
240	ENSMUSG00000032883	Acsl3	-0.427262	9.5934e-06	0.000634717
241	ENSMUSG00000030095	Tmem43	0.48745	9.56106e-06	0.000634717
242	ENSMUSG00000018750	Zbtb4	0.295747	9.68288e-06	0.000637989
243	ENSMUSG00000029036	Atad3a	-0.228873	9.85574e-06	0.000641553
244	ENSMUSG00000032349	Elovl5	-0.41325	9.79792e-06	0.000641553
245	ENSMUSG00000021136	Smoc1	-0.287657	9.85766e-06	0.000641553
246	ENSMUSG00000118669	Arvcf	0.541671	9.91804e-06	0.000642858
247	ENSMUSG00000040618	Pck2	0.554748	1.01738e-05	0.000656767
248	ENSMUSG00000024958	Gpr137	-0.218778	1.0266e-05	0.000660043
249	ENSMUSG00000037966	Ninj1	0.473457	1.03684e-05	0.000661296
250	ENSMUSG00000021180	Rps6ka5	0.483645	1.03452e-05	0.000661296
251	ENSMUSG00000110631	Gm42047	1.38574	1.09428e-05	0.000695152
252	ENSMUSG00000033576	Apol6	1.65214	1.11385e-05	0.000704774
253	ENSMUSG00000019853	Hebp2	-0.775809	1.13174e-05	0.000713267
254	ENSMUSG00000109282	Gm45188	1.07702	1.13991e-05	0.000715587
255	ENSMUSG00000025937	Lactb2	-0.372051	1.18774e-05	0.000739783
256	ENSMUSG00000040181	Fmo1	-0.454723	1.18667e-05	0.000739783
257	ENSMUSG00000002949	Timm44	-0.274751	1.19239e-05	0.000739793
258	ENSMUSG00000027165	Iftap	0.389355	1.205e-05	0.000741843
259	ENSMUSG00000035686	Thrsp	-0.417045	1.20482e-05	0.000741843
260	ENSMUSG00000041977	Arhgef11	0.323576	1.21226e-05	0.00074344
261	ENSMUSG00000021241	Isca2	-0.22094	1.22751e-05	0.000749911
262	ENSMUSG00000107838	Gm45769	-0.468188	1.39068e-05	0.000846348
263	ENSMUSG00000057329	Bcl2	1.14763	1.46404e-05	0.000884271
264	ENSMUSG00000057497	Fam136a	-0.307475	1.46451e-05	0.000884271
265	ENSMUSG00000015016	Acsf3	-0.380868	1.46963e-05	0.000884271
266	ENSMUSG00000038084	Opa1	-0.24182	1.50545e-05	0.000902422
267	ENSMUSG00000057614	Gnai1	0.53206	1.5137e-05	0.000903967
268	ENSMUSG00000114665	Lncbate6	-0.57703	1.56293e-05	0.000929887
269	ENSMUSG00000027327	1700037H04Rik	-0.512309	1.67277e-05	0.000991535
270	ENSMUSG00000009090	Ap1b1	-0.240792	1.77016e-05	0.00104538
271	ENSMUSG00000019158	Tmem160	0.439502	1.78995e-05	0.00104545
272	ENSMUSG00000031958	Ldhd	-0.323385	1.78542e-05	0.00104545
273	ENSMUSG00000037971	1110032A03Rik	-0.422292	1.78903e-05	0.00104545
274	ENSMUSG00000102918	Pcdhgc3	0.605613	1.79857e-05	0.00104665
275	ENSMUSG00000024533	Spire1	-0.510471	1.83735e-05	0.00106533
276	ENSMUSG00000036932	Aifm1	-0.290974	1.91933e-05	0.00110883
277	ENSMUSG00000038393	Txnip	0.84696	1.93549e-05	0.00111413
278	ENSMUSG00000028645	Slc2a1	0.557891	1.94791e-05	0.00111612
279	ENSMUSG00000024426	Atat1	-0.405555	1.95295e-05	0.00111612
280	ENSMUSG00000040170	Fmo2	0.495937	2.07957e-05	0.00118424
281	ENSMUSG00000027624	Epb41l1	0.369346	2.10672e-05	0.00119543
282	ENSMUSG00000028341	Nr4a3	1.87121	2.17106e-05	0.00121938
283	ENSMUSG00000036553	Sh3tc1	0.599976	2.18792e-05	0.00121938
284	ENSMUSG00000020917	Acly	-0.460316	2.17553e-05	0.00121938
285	ENSMUSG00000022346	Myc	1.32214	2.1948e-05	0.00121938
286	ENSMUSG00000024070	Prkd3	0.31793	2.19029e-05	0.00121938
287	ENSMUSG00000024935	Slc1a1	-0.959096	2.15945e-05	0.00121938
288	ENSMUSG00000028700	Pomgnt1	-0.241511	2.24666e-05	0.00123955
289	ENSMUSG00000036395	Glb1l2	1.07649	2.23908e-05	0.00123955
290	ENSMUSG00000026005	Rpe	-0.284786	2.2926e-05	0.0012519
291	ENSMUSG00000009621	Vav2	-0.585364	2.28982e-05	0.0012519
292	ENSMUSG00000033208	S100b	-0.673843	2.27965e-05	0.0012519
293	ENSMUSG00000021796	Bmpr1a	0.424297	2.31106e-05	0.00125767
294	ENSMUSG00000006301	Tmbim1	0.306619	2.33037e-05	0.00126387
295	ENSMUSG00000019763	Rmnd1	-0.325374	2.38873e-05	0.00129113
296	ENSMUSG00000038526	Car14	0.717863	2.43492e-05	0.00131165
297	ENSMUSG00000051116	Gm8121	-0.766215	2.4825e-05	0.00132831
298	ENSMUSG00000023832	Acat2	-0.367572	2.4795e-05	0.00132831
299	ENSMUSG00000046844	Vat1l	1.48578	2.50507e-05	0.00133145
300	ENSMUSG00000020808	Pimreg	1.5911	2.50289e-05	0.00133145
301	ENSMUSG00000053168	9030619P08Rik	1.59698	2.54716e-05	0.00134932
302	ENSMUSG00000058966	Tlcd3b	-0.865152	2.58046e-05	0.00136243
303	ENSMUSG00000022427	Tomm22	-0.265428	2.63572e-05	0.00138701
304	ENSMUSG00000022351	Sqle	-0.634113	2.65391e-05	0.00139199
305	ENSMUSG00000054008	Ndst1	0.279634	2.75906e-05	0.0014424
306	ENSMUSG00000028405	Aco1	-0.261032	2.78099e-05	0.00144912
307	ENSMUSG00000025525	Apool	-0.312529	2.8106e-05	0.00145977
308	ENSMUSG00000039629	Strip2	1.25875	2.82709e-05	0.00146357
309	ENSMUSG00000024507	Hsd17b4	-0.224745	2.84491e-05	0.00146803
310	ENSMUSG00000015776	Med22	0.255194	2.86974e-05	0.00147607
311	ENSMUSG00000079555	Haus3	-0.666441	2.8968e-05	0.00148043
312	ENSMUSG00000023004	Tuba1b	0.392836	2.89568e-05	0.00148043
313	ENSMUSG00000016344	Ppdpf	-0.35367	2.90801e-05	0.00148141
314	ENSMUSG00000028961	Pgd	-0.495502	3.00834e-05	0.00152281
315	ENSMUSG00000001517	Foxm1	1.33568	3.00837e-05	0.00152281
316	ENSMUSG00000023044	Csad	-0.275525	3.07012e-05	0.00154915
317	ENSMUSG00000020079	Supv3l1	-0.26687	3.08813e-05	0.00155332
318	ENSMUSG00000103149	AA914427	-0.778366	3.16078e-05	0.00158486
319	ENSMUSG00000038860	Garnl3	-0.472798	3.23013e-05	0.00161456
320	ENSMUSG00000027222	Pex16	-0.372423	3.25495e-05	0.00162188
321	ENSMUSG00000054072	Iigp1	3.45136	3.35309e-05	0.00166558
322	ENSMUSG00000020914	Top2a	1.41066	3.43058e-05	0.00169878
323	ENSMUSG00000025495	Ptdss2	-0.47553	3.45257e-05	0.00170437
324	ENSMUSG00000021589	Rhobtb3	0.696431	3.47093e-05	0.00170815
325	ENSMUSG00000015095	Fbxw5	-0.233995	3.48577e-05	0.00171017
326	ENSMUSG00000068335	Dok1	0.962461	3.52507e-05	0.00171888
327	ENSMUSG00000038168	P3h2	1.07865	3.51883e-05	0.00171888
328	ENSMUSG00000046722	Cdc42se1	0.326769	3.54842e-05	0.00172499
329	ENSMUSG00000036959	Bcorl1	0.510385	3.58903e-05	0.00173943
330	ENSMUSG00000019235	Rps6kl1	-0.440733	3.67722e-05	0.00177677
331	ENSMUSG00000073481	Mtarc2	0.38576	3.86933e-05	0.00185838
332	ENSMUSG00000091561	Gm6665	1.02829	3.86943e-05	0.00185838
333	ENSMUSG00000021509	Slc25a48	0.464125	3.91875e-05	0.00187641
334	ENSMUSG00000014599	Csf1	0.63344	3.94759e-05	0.00188286
335	ENSMUSG00000033685	Ucp2	0.472168	3.95583e-05	0.00188286
336	ENSMUSG00000019732	Calr3	0.574237	3.98135e-05	0.00188936
337	ENSMUSG00000045246	Kcng4	-0.877004	3.99345e-05	0.00188948
338	ENSMUSG00000029208	Guf1	-0.278264	4.05781e-05	0.00189882
339	ENSMUSG00000111468	5033425B01Rik	1.4207	4.04469e-05	0.00189882
340	ENSMUSG00000042363	Lgalsl	0.475804	4.06081e-05	0.00189882
341	ENSMUSG00000104213	Ighd	-3.12408	4.05223e-05	0.00189882
342	ENSMUSG00000040521	Tsfm	-0.303382	4.09013e-05	0.00190693
343	ENSMUSG00000055652	Klhl25	0.572977	4.13981e-05	0.00192447
344	ENSMUSG00000023348	Trip6	0.356454	4.20158e-05	0.00194751
345	ENSMUSG00000040016	Ptger3	-0.654142	4.27968e-05	0.00197224
346	ENSMUSG00000020091	Eif4ebp2	-0.283574	4.269e-05	0.00197224
347	ENSMUSG00000034880	Mrpl34	-0.396094	4.32613e-05	0.00198219
348	ENSMUSG00000115100	Gm34934	0.578047	4.32344e-05	0.00198219
349	ENSMUSG00000022186	Oxct1	0.346061	4.36811e-05	0.00199569
350	ENSMUSG00000051811	Cox6b2	0.785209	4.39705e-05	0.00200317
351	ENSMUSG00000039263	Npepl1	-0.313421	4.43707e-05	0.00200992
352	ENSMUSG00000045350	Fam186a	-0.74606	4.4329e-05	0.00200992
353	ENSMUSG00000041444	Arhgap32	0.493149	4.50969e-05	0.00203703
354	ENSMUSG00000031938	4931406C07Rik	-0.357056	4.5765e-05	0.00205839
355	ENSMUSG00000035944	Ttc38	-0.347916	4.58281e-05	0.00205839
356	ENSMUSG00000121084	ENSMUSG00000121084	-0.696789	4.65739e-05	0.00208601
357	ENSMUSG00000014776	Nol3	-0.317539	4.7007e-05	0.00209951
358	ENSMUSG00000001761	Smo	0.533176	4.72222e-05	0.00210324
359	ENSMUSG00000026175	Vil1	-1.43232	4.77845e-05	0.00212235
360	ENSMUSG00000038167	Plekhg6	0.957551	4.82959e-05	0.0021391
361	ENSMUSG00000043079	Synpo	1.09017	4.90495e-05	0.00216647
362	ENSMUSG00000078570	1110065P20Rik	-0.325697	5.02758e-05	0.0022145
363	ENSMUSG00000007837	Prrg2	-0.411238	5.10304e-05	0.00223567
364	ENSMUSG00000021666	Gfm2	-0.291071	5.11772e-05	0.00223567
365	ENSMUSG00000014503	Pkd2l2	-0.346848	5.11117e-05	0.00223567
366	ENSMUSG00000024527	Afg3l2	-0.281142	5.17129e-05	0.0022529
367	ENSMUSG00000038816	Ctnnal1	0.503036	5.23131e-05	0.00227284
368	ENSMUSG00000068874	Selenbp1	0.543721	5.26688e-05	0.00228207
369	ENSMUSG00000021957	Tkt	-0.375032	5.30521e-05	0.00229245
370	ENSMUSG00000021236	Entpd5	-0.294732	5.44926e-05	0.00234643
371	ENSMUSG00000092564	BC051226	0.966067	5.45956e-05	0.00234643
372	ENSMUSG00000034875	Nudt19	-0.362747	5.58099e-05	0.00239218
373	ENSMUSG00000024331	Dsc2	2.86559	5.72749e-05	0.00244839
374	ENSMUSG00000027305	Ndufaf1	-0.233549	5.86131e-05	0.00249889
375	ENSMUSG00000035401	Emsy	0.389244	5.90015e-05	0.00250874
376	ENSMUSG00000028557	Rnf11	-0.240821	5.96323e-05	0.00252445
377	ENSMUSG00000003623	Crot	-0.405223	5.97044e-05	0.00252445
378	ENSMUSG00000030987	Stim1	0.297275	5.9846e-05	0.00252445
379	ENSMUSG00000026509	Capn2	-0.220944	6.27454e-05	0.00263283
380	ENSMUSG00000039768	Dnajc11	-0.300113	6.26963e-05	0.00263283
381	ENSMUSG00000019996	Map7	-0.675227	6.29535e-05	0.00263463
382	ENSMUSG00000087480	Gm15910	2.23544	6.31346e-05	0.00263529
383	ENSMUSG00000006494	Pdk1	-0.328061	6.35984e-05	0.00264772
384	ENSMUSG00000028719	Cmpk1	-0.274054	6.49686e-05	0.00267083
385	ENSMUSG00000063694	Cycs	-0.271002	6.49438e-05	0.00267083
386	ENSMUSG00000066571	Garre1	0.448003	6.45764e-05	0.00267083
387	ENSMUSG00000031725	Ces1f	-0.669175	6.50204e-05	0.00267083
388	ENSMUSG00000085913	Gm15601	0.907962	6.49905e-05	0.00267083
389	ENSMUSG00000024777	Ppp2r5b	-0.388756	6.51586e-05	0.00267083
390	ENSMUSG00000022803	Popdc2	0.410207	6.5765e-05	0.00268878
391	ENSMUSG00000001999	Blvra	0.522785	6.66246e-05	0.00271695
392	ENSMUSG00000058997	Vwa8	-0.380334	6.76053e-05	0.00274991
393	ENSMUSG00000036904	Fzd8	0.522745	6.8672e-05	0.0027862
394	ENSMUSG00000038295	Atg9b	-0.503452	6.91212e-05	0.0027973
395	ENSMUSG00000026922	Agpat2	-0.375721	6.95467e-05	0.00280341
396	ENSMUSG00000118029	ENSMUSG00000118029	-1.57957	6.96237e-05	0.00280341
397	ENSMUSG00000042251	Pm20d1	-0.465339	7.01557e-05	0.00281772
398	ENSMUSG00000058799	Nap1l1	0.511043	7.10825e-05	0.00284776
399	ENSMUSG00000019923	Zwint	-0.21901	7.18233e-05	0.00287023
400	ENSMUSG00000029600	Rita1	-0.384885	7.24121e-05	0.00288653
401	ENSMUSG00000037692	Ahdc1	0.388779	7.31577e-05	0.00290897
402	ENSMUSG00000009394	Syn2	0.753733	7.46574e-05	0.00296123
403	ENSMUSG00000006235	Epor	-0.659915	7.52531e-05	0.00297745
404	ENSMUSG00000107704	Gm36355	-0.840345	7.59302e-05	0.0029968
405	ENSMUSG00000045954	Cavin2	0.466223	7.69972e-05	0.00302691
406	ENSMUSG00000024143	Rhoq	-0.212784	7.70729e-05	0.00302691
407	ENSMUSG00000038351	Sgsm2	0.503765	7.77778e-05	0.00304709
408	ENSMUSG00000026872	Zeb2	0.57817	8.1126e-05	0.00317048
409	ENSMUSG00000043300	B3galnt1	0.83288	8.29326e-05	0.00323316
410	ENSMUSG00000039231	Suv39h1	0.686472	8.44745e-05	0.00328523
411	ENSMUSG00000028792	Ak2	-0.310486	8.52071e-05	0.00330566
412	ENSMUSG00000047213	Ythdf3	-0.203307	8.62996e-05	0.00333992
413	ENSMUSG00000038539	Atf5	-0.486297	8.69666e-05	0.00335758
414	ENSMUSG00000072571	Tmem253	-0.582145	8.76063e-05	0.00337411
415	ENSMUSG00000027282	Mtch2	-0.22704	8.88189e-05	0.00341257
416	ENSMUSG00000031641	Cbr4	-0.252229	8.97969e-05	0.00344185
417	ENSMUSG00000074213	Gm10642	-1.14516	9.20146e-05	0.0035184
418	ENSMUSG00000005674	Tomm40l	-0.376746	9.39594e-05	0.00358417
419	ENSMUSG00000038324	Trpc4ap	-0.190648	9.61315e-05	0.00365827
420	ENSMUSG00000048279	Sacs	0.813241	9.83239e-05	0.0037328
421	ENSMUSG00000079017	Ifi27l2a	0.921786	9.86908e-05	0.00373783
422	ENSMUSG00000047371	Zfp768	-0.293367	9.98619e-05	0.00377322
423	ENSMUSG00000038936	Sccpdh	-0.501432	0.000100396	0.00378444
424	ENSMUSG00000028416	Bag1	-0.283914	0.000101758	0.00382673
425	ENSMUSG00000028684	Urod	-0.204175	0.000102005	0.00382698
426	ENSMUSG00000029167	Ppargc1a	0.518305	0.000102925	0.00385242
427	ENSMUSG00000070639	Lrrc8b	-0.666508	0.000106325	0.00395985
428	ENSMUSG00000070047	Fat1	0.606488	0.00010654	0.00395985
429	ENSMUSG00000021922	Itih4	2.01161	0.000106054	0.00395985
430	ENSMUSG00000025825	Iscu	-0.261586	0.000108591	0.00400808
431	ENSMUSG00000025854	Fam20c	0.727951	0.000108459	0.00400808
432	ENSMUSG00000039646	Vasn	0.878697	0.000108458	0.00400808
433	ENSMUSG00000071662	Polr2g	-0.216811	0.00010893	0.0040113
434	ENSMUSG00000046031	Calhm6	1.57526	0.000113029	0.00415266
435	ENSMUSG00000046169	Adamts6	1.60488	0.000114196	0.00417761
436	ENSMUSG00000037815	Ctnna1	-0.397015	0.000114232	0.00417761
437	ENSMUSG00000074280	Gm6166	-1.01481	0.000117615	0.00429148
438	ENSMUSG00000004035	Gstm7	0.576044	0.000118475	0.00431298
439	ENSMUSG00000046668	Cxxc5	0.350244	0.000123166	0.00447353
440	ENSMUSG00000010914	Pdhx	-0.26291	0.00012406	0.00449577
441	ENSMUSG00000022096	Hr	0.515844	0.000126648	0.00457913
442	ENSMUSG00000033068	Entpd6	0.527882	0.000132858	0.00479281
443	ENSMUSG00000066415	Msl2	0.370628	0.000133617	0.00480931
444	ENSMUSG00000056973	Ces1d	-0.204963	0.000134974	0.00484721
445	ENSMUSG00000035478	Mbd3	-0.2905	0.000135519	0.00485583
446	ENSMUSG00000019794	Katna1	-0.312416	0.000136151	0.00485666
447	ENSMUSG00000053950	Adnp2	0.403846	0.000136066	0.00485666
448	ENSMUSG00000069874	Irgm2	2.1173	0.000139023	0.00494805
449	ENSMUSG00000047182	Irs3	0.68191	0.000139788	0.00496418
450	ENSMUSG00000044378	Slc15a5	-1.37552	0.000140912	0.00499297
451	ENSMUSG00000033105	Lss	-0.461877	0.000143945	0.00508914
452	ENSMUSG00000041912	Tdrkh	-0.410602	0.000144737	0.00510583
453	ENSMUSG00000035226	Rims4	-0.772978	0.000146228	0.00514703
454	ENSMUSG00000037857	Nufip2	0.421744	0.000146806	0.00515598
455	ENSMUSG00000111250	Gm47818	-0.534208	0.000149058	0.00522359
456	ENSMUSG00000005951	Shpk	-0.342306	0.00014952	0.00522829
457	ENSMUSG00000051934	Spats2	-0.487479	0.000150728	0.00525897
458	ENSMUSG00000027215	Cd82	0.364975	0.000151848	0.00528649
459	ENSMUSG00000024900	Cpt1a	0.519484	0.000153071	0.00531747
460	ENSMUSG00000049657	Zbtb5	0.398846	0.000155407	0.00537779
461	ENSMUSG00000033909	Usp36	0.423858	0.000155482	0.00537779
462	ENSMUSG00000055900	Tmem69	-0.318535	0.000156315	0.0053899
463	ENSMUSG00000097327	E030030I06Rik	-0.677402	0.000156508	0.0053899
464	ENSMUSG00000020832	Eral1	-0.247307	0.000158706	0.00545379
465	ENSMUSG00000060803	Gstp1	-0.354347	0.000161674	0.00554386
466	ENSMUSG00000045102	Poln	-0.43018	0.000163541	0.00557576
467	ENSMUSG00000019302	Atp6v0a1	0.382399	0.000163572	0.00557576
468	ENSMUSG00000006920	Ezh1	0.386598	0.000163653	0.00557576
469	ENSMUSG00000028284	Map3k7	-0.22183	0.000164839	0.00559225
470	ENSMUSG00000018672	Copz2	-0.292707	0.000164567	0.00559225
471	ENSMUSG00000028249	Sdcbp	-0.188129	0.000167104	0.00565706
472	ENSMUSG00000013076	Amotl1	0.536558	0.000167514	0.00565892
473	ENSMUSG00000109904	Gm45819	-0.503184	0.000168023	0.00566411
474	ENSMUSG00000026618	Iars2	-0.258906	0.000168847	0.00567988
475	ENSMUSG00000029840	Mtpn	-0.237877	0.000169884	0.00570274
476	ENSMUSG00000104204	Gm37397	-0.737984	0.00017072	0.00570677
477	ENSMUSG00000018415	Gid4	-0.234458	0.000170538	0.00570677
478	ENSMUSG00000038235	F11r	0.307466	0.000173219	0.0057782
479	ENSMUSG00000032757	Bet1	-0.335875	0.000173796	0.00578535
480	ENSMUSG00000027195	Hsd17b12	-0.328597	0.000175809	0.00582694
481	ENSMUSG00000020044	Timp3	0.56709	0.00017573	0.00582694
482	ENSMUSG00000004937	Sgta	-0.235496	0.000176142	0.00582694
483	ENSMUSG00000026927	Entr1	-0.215549	0.000177504	0.00585675
484	ENSMUSG00000039599	Fam149b	-0.262576	0.000177778	0.00585675
485	ENSMUSG00000038518	Jarid2	0.400908	0.000179762	0.00590991
486	ENSMUSG00000022105	Rb1	-0.216085	0.000180493	0.00592174
487	ENSMUSG00000034981	Parm1	-0.380143	0.000182109	0.00596169
488	ENSMUSG00000019810	Fuca2	0.442231	0.000182459	0.00596169
489	ENSMUSG00000028633	Ctps	0.553287	0.000183885	0.00597159
490	ENSMUSG00000020142	Slc1a4	0.865259	0.000183352	0.00597159
491	ENSMUSG00000071847	Apcdd1	1.30264	0.000183638	0.00597159
492	ENSMUSG00000038582	Pptc7	0.260975	0.000188823	0.00610705
493	ENSMUSG00000061313	Ddhd2	-0.44024	0.000188808	0.00610705
494	ENSMUSG00000045287	Rtn4rl1	0.695781	0.000191536	0.00618228
495	ENSMUSG00000033763	Mtss2	0.506662	0.000193404	0.00622995
496	ENSMUSG00000030629	Zfand6	-0.260676	0.000195025	0.00623183
497	ENSMUSG00000011382	Dhdh	-0.234005	0.000194858	0.00623183
498	ENSMUSG00000020492	Ska2	0.670912	0.000194106	0.00623183
499	ENSMUSG00000022817	Itgb5	0.281426	0.000194962	0.00623183
500	ENSMUSG00000027223	Mapk8ip1	-0.580896	0.000195732	0.00624191
501	ENSMUSG00000029545	Acads	-0.30731	0.000196608	0.00625179
502	ENSMUSG00000029513	Prkab1	-0.559741	0.000196827	0.00625179
503	ENSMUSG00000107002	0610012G03Rik	-0.348245	0.00019761	0.00626419
504	ENSMUSG00000032009	Sesn3	0.374251	0.000198485	0.00627944
505	ENSMUSG00000029622	Arpc1b	0.436172	0.000203146	0.00640292
506	ENSMUSG00000064349	mt-Tc	-0.799247	0.000203191	0.00640292
507	ENSMUSG00000054484	Tmem62	0.608103	0.000205078	0.00644965
508	ENSMUSG00000036867	Smad6	0.765668	0.000208381	0.00654061
509	ENSMUSG00000010277	2610507B11Rik	-0.269193	0.000209358	0.00655837
510	ENSMUSG00000023106	Denr	-0.214792	0.000210599	0.00657874
511	ENSMUSG00000023034	Nr4a1	2.79366	0.000210833	0.00657874
512	ENSMUSG00000110456	Gm45865	-1.3045	0.000213496	0.00662643
513	ENSMUSG00000036046	5031439G07Rik	-0.325613	0.000213502	0.00662643
514	ENSMUSG00000022330	Osr2	0.973489	0.000213608	0.00662643
515	ENSMUSG00000004626	Stxbp2	-0.328834	0.000215262	0.00665185
516	ENSMUSG00000022707	Gbe1	-0.251292	0.000215216	0.00665185
517	ENSMUSG00000031383	Dusp9	2.48542	0.00021753	0.00670892
518	ENSMUSG00000028444	Cntfr	1.13053	0.000218322	0.00672034
519	ENSMUSG00000021974	Fgf9	1.2997	0.000220231	0.00676605
520	ENSMUSG00000053929	Cyhr1	-0.286453	0.000221113	0.0067801
521	ENSMUSG00000115553	Gm49124	0.927744	0.000223041	0.00682607
522	ENSMUSG00000060675	Plaat3	0.325882	0.000224085	0.0068449
523	ENSMUSG00000029125	Stx18	-0.271402	0.000227378	0.0069322
524	ENSMUSG00000034109	Golim4	-0.243804	0.000228941	0.00696653
525	ENSMUSG00000032754	Slc8b1	0.355053	0.000231706	0.00702385
526	ENSMUSG00000078853	Igtp	2.647	0.000231626	0.00702385
527	ENSMUSG00000000876	Pxmp4	-0.246514	0.000233237	0.00705686
528	ENSMUSG00000041308	Sntb2	0.492289	0.000233956	0.00706521
529	ENSMUSG00000058216	Gstp3	-0.730717	0.000236353	0.00712411
530	ENSMUSG00000032679	Cd59a	0.282726	0.000237996	0.00716008
531	ENSMUSG00000037058	Paip2	-0.209154	0.000238803	0.00717083
532	ENSMUSG00000035357	Pdzrn3	0.519739	0.000239496	0.0071753
533	ENSMUSG00000090935	Synj2bp	-0.208075	0.000239852	0.0071753
534	ENSMUSG00000053768	Chchd3	-0.224691	0.000246388	0.00735704
535	ENSMUSG00000041453	Rpl21	0.700528	0.000251794	0.00750441
536	ENSMUSG00000063382	Bcl9l	0.59127	0.00025412	0.00755958
537	ENSMUSG00000027452	Acss1	-0.615262	0.000255053	0.00757323
538	ENSMUSG00000105096	Gbp10	3.79123	0.000256492	0.0076018
539	ENSMUSG00000093732	Gm20609	-1.83926	0.000257455	0.00761459
540	ENSMUSG00000035373	Ccl7	3.78464	0.000257879	0.00761459
541	ENSMUSG00000022604	Cep97	0.53896	0.000258765	0.00762662
542	ENSMUSG00000021982	Cdadc1	-0.181704	0.000259561	0.00763596
543	ENSMUSG00000040044	Orc3	-0.263156	0.000260754	0.00765694
544	ENSMUSG00000026567	Adcy10	-0.599132	0.000266626	0.00781497
545	ENSMUSG00000059775	Rps26-ps1	-0.952002	0.000267316	0.00782084
546	ENSMUSG00000026749	Nek6	0.870415	0.00027112	0.00791761
547	ENSMUSG00000079499	6530402F18Rik	0.425619	0.000272191	0.00793435
548	ENSMUSG00000005683	Cs	-0.198531	0.000276506	0.00804543
549	ENSMUSG00000022314	Rad21	0.198924	0.000281514	0.00817621
550	ENSMUSG00000063235	Ptpmt1	-0.264698	0.000286198	0.00826707
551	ENSMUSG00000031925	Maml2	0.702094	0.000285215	0.00826707
552	ENSMUSG00000024197	Plin3	-0.478645	0.000285807	0.00826707
553	ENSMUSG00000025871	4833439L19Rik	-0.246908	0.000287922	0.00830185
554	ENSMUSG00000075324	Fign	0.572183	0.000288986	0.00831749
555	ENSMUSG00000038648	Creb3l2	0.36365	0.000292407	0.00840077
556	ENSMUSG00000027952	Pmvk	-0.406474	0.00029571	0.00848038
557	ENSMUSG00000026701	Prdx6	0.317392	0.000301136	0.00862048
558	ENSMUSG00000030104	Edem1	0.271546	0.000304741	0.00870169
559	ENSMUSG00000042709	Atpaf2	-0.225548	0.000305064	0.00870169
560	ENSMUSG00000026201	Stk16	-0.209763	0.000308211	0.00877403
561	ENSMUSG00000076490	Trbc1	2.49501	0.000308701	0.00877403
562	ENSMUSG00000041653	Pnpla3	-0.457351	0.000309328	0.00877622
563	ENSMUSG00000006498	Ptbp1	0.250047	0.000317257	0.00898518
564	ENSMUSG00000044434	Gm9791	-0.657086	0.000318356	0.00900034
565	ENSMUSG00000086873	Gm15672	1.7769	0.000321991	0.00908699
566	ENSMUSG00000039384	Dusp10	0.63783	0.000325402	0.00916508
567	ENSMUSG00000107451	Gm44421	1.19261	0.000325908	0.00916508
568	ENSMUSG00000045983	Eif4g1	-0.188648	0.000326702	0.00917124
569	ENSMUSG00000000171	Sdhd	-0.261688	0.000332031	0.00930445
570	ENSMUSG00000050332	Amer1	0.453932	0.000334263	0.00935056
571	ENSMUSG00000018143	Mafk	0.414038	0.000335233	0.00936128
572	ENSMUSG00000028607	Cpt2	-0.284806	0.000336722	0.00938642
573	ENSMUSG00000059173	Pde1a	0.326587	0.000338389	0.00941642
574	ENSMUSG00000034663	Bmp2k	0.592178	0.000342244	0.00949058
575	ENSMUSG00000109841	E330011O21Rik	-0.689998	0.000341963	0.00949058
576	ENSMUSG00000024436	Mrps18b	-0.26857	0.00034574	0.00957086
577	ENSMUSG00000027573	Gid8	-0.209351	0.000349933	0.00963677
578	ENSMUSG00000074093	Svip	-0.256375	0.000348809	0.00963677
579	ENSMUSG00000051255	Gm6563	-0.524551	0.000349702	0.00963677
580	ENSMUSG00000045160	Bola3	-0.351515	0.000350804	0.00964409
581	ENSMUSG00000026564	Dusp27	3.1988	0.000357584	0.00979669
582	ENSMUSG00000031274	Col4a5	0.604457	0.000357392	0.00979669
583	ENSMUSG00000027460	Angpt4	1.664	0.000360272	0.00982724
584	ENSMUSG00000000787	Ddx3x	-0.207383	0.000360548	0.00982724
585	ENSMUSG00000087107	AI662270	1.71439	0.00035966	0.00982724
586	ENSMUSG00000072582	Ptrh2	-0.280272	0.000361434	0.00983458
587	ENSMUSG00000027108	Ola1	-0.243303	0.000365889	0.00993885
588	ENSMUSG00000102752	Gm7694	0.760343	0.000368353	0.00998875
589	ENSMUSG00000002105	Slc39a13	0.346592	0.000370769	0.0100372
590	ENSMUSG00000120511	ENSMUSG00000120511	-0.824184	0.000371512	0.0100403
591	ENSMUSG00000022412	Mief1	-0.203719	0.000375679	0.0101357
592	ENSMUSG00000052337	Immt	-0.230358	0.000376501	0.0101407
593	ENSMUSG00000097440	Gm6277	-0.38988	0.000377562	0.0101522
594	ENSMUSG00000037685	Atp8a1	-0.420721	0.000379829	0.0101805
595	ENSMUSG00000001918	Slc1a5	0.271292	0.000380368	0.0101805
596	ENSMUSG00000030826	Bcat2	0.397736	0.000380533	0.0101805
597	ENSMUSG00000036459	Wtip	0.565181	0.000381381	0.0101861
598	ENSMUSG00000044854	1700056E22Rik	-0.514881	0.000384366	0.0102487
599	ENSMUSG00000030869	Ndufab1	-0.287135	0.000385727	0.0102678
600	ENSMUSG00000031349	Nsdhl	-0.35532	0.000390966	0.0103726
601	ENSMUSG00000063388	BC023105	3.32628	0.000390598	0.0103726
602	ENSMUSG00000037440	Vnn1	1.31575	0.000391823	0.0103781
603	ENSMUSG00000055407	Map6	-0.478721	0.000392686	0.0103837
604	ENSMUSG00000037353	Letmd1	-0.420691	0.000403775	0.0106593
605	ENSMUSG00000020538	Srebf1	-0.522247	0.000405406	0.0106846
606	ENSMUSG00000050390	C77080	-0.866971	0.000410958	0.0108131
607	ENSMUSG00000021884	Hacl1	-0.465993	0.000416533	0.0109417
608	ENSMUSG00000058486	Wdr91	0.337912	0.000419382	0.0109443
609	ENSMUSG00000019809	Pex3	-0.247124	0.000419851	0.0109443
610	ENSMUSG00000019437	Tlcd1	-0.232989	0.000420064	0.0109443
611	ENSMUSG00000061306	Slc38a10	-0.634808	0.000417911	0.0109443
612	ENSMUSG00000021371	Mcur1	-0.215721	0.000419801	0.0109443
613	ENSMUSG00000075467	Dnlz	-0.271491	0.000422963	0.0110019
614	ENSMUSG00000038838	Vars2	-0.284153	0.000424962	0.0110359
615	ENSMUSG00000008859	Rala	-0.304433	0.000425778	0.0110391
616	ENSMUSG00000034729	Mrps10	-0.235925	0.000427367	0.0110623
617	ENSMUSG00000087505	Gm15241	-0.640662	0.000430067	0.0111007
618	ENSMUSG00000005899	Smpd4	-0.249432	0.000430245	0.0111007
619	ENSMUSG00000040242	Fgfr1op2	-0.240015	0.000435183	0.01121
620	ENSMUSG00000021704	Mtx3	-0.346199	0.000438698	0.0112823
621	ENSMUSG00000078684	5830417I10Rik	0.43672	0.000441427	0.011316
622	ENSMUSG00000020736	Nt5c	0.339239	0.000440955	0.011316
623	ENSMUSG00000020869	Lrrc59	-0.183955	0.000444532	0.0113773
624	ENSMUSG00000108763	Gm36028	-0.791395	0.000451208	0.0115297
625	ENSMUSG00000005981	Trap1	-0.151995	0.000455306	0.0116158
626	ENSMUSG00000037703	Lzts3	0.489523	0.000456457	0.0116265
627	ENSMUSG00000025486	Sirt3	-0.259636	0.000458444	0.0116545
628	ENSMUSG00000053964	Lgals4	0.459972	0.000459015	0.0116545
629	ENSMUSG00000002984	Tomm40	-0.220757	0.00046068	0.0116721
630	ENSMUSG00000003849	Nqo1	1.18285	0.000461176	0.0116721
631	ENSMUSG00000024048	Myl12a	0.578767	0.000462945	0.0116983
632	ENSMUSG00000039497	Dse	0.893949	0.000465706	0.0117495
633	ENSMUSG00000036257	Pnpla8	-0.203627	0.000469385	0.0118236
634	ENSMUSG00000034245	Hdac11	-1.08952	0.000476699	0.0119889
635	ENSMUSG00000007415	Gatad1	-0.278341	0.000478359	0.0119916
636	ENSMUSG00000030711	Sult1a1	0.796651	0.000479064	0.0119916
637	ENSMUSG00000042444	Mindy2	-0.280685	0.000477779	0.0119916
638	ENSMUSG00000021234	Fam161b	-0.369721	0.000487994	0.012196
639	ENSMUSG00000042622	Maff	-0.814739	0.000492193	0.0122817
640	ENSMUSG00000116288	Gm41349	2.02288	0.000493212	0.0122879
641	ENSMUSG00000033453	Adamts15	0.929958	0.000496117	0.012341
642	ENSMUSG00000023707	Ogfod2	-0.322502	0.000511711	0.0127091
643	ENSMUSG00000028081	Rps3a1	0.55936	0.000516663	0.0128121
644	ENSMUSG00000032387	Rbpms2	-0.292773	0.000518563	0.0128393
645	ENSMUSG00000039648	Kyat1	0.268063	0.000524705	0.0129511
646	ENSMUSG00000031767	Nudt7	-0.194159	0.000524075	0.0129511
647	ENSMUSG00000038776	Ephx1	0.42714	0.000528963	0.0130159
648	ENSMUSG00000057346	Apol9a	4.41594	0.00052821	0.0130159
649	ENSMUSG00000042724	Map3k9	-0.988097	0.000533008	0.0130952
650	ENSMUSG00000002831	Plin4	0.410098	0.000533879	0.0130965
651	ENSMUSG00000021311	Mtr	0.445684	0.000543982	0.0133165
652	ENSMUSG00000062488	Ifit3b	1.59898	0.000544521	0.0133165
653	ENSMUSG00000030654	Arl6ip1	0.209155	0.000547494	0.0133483
654	ENSMUSG00000024769	Cdc42bpg	-0.437626	0.000547462	0.0133483
655	ENSMUSG00000021235	Coq6	-0.297626	0.000551143	0.0134168
656	ENSMUSG00000026687	Aldh9a1	-0.310816	0.000557959	0.013562
657	ENSMUSG00000026558	Uck2	0.293724	0.000561583	0.0136293
658	ENSMUSG00000036504	Phpt1	-0.40491	0.000572858	0.0138818
659	ENSMUSG00000028179	Cth	1.27008	0.000578508	0.0139974
660	ENSMUSG00000063171	Rps4l	-0.373069	0.000585376	0.0141421
661	ENSMUSG00000054021	Sirt5	-0.289319	0.000592058	0.0142819
662	ENSMUSG00000021114	Atp6v1d	-0.237375	0.000593139	0.0142864
663	ENSMUSG00000006517	Mvd	-0.347939	0.000594061	0.014287
664	ENSMUSG00000039470	Zdhhc2	0.274246	0.000598659	0.0143759
665	ENSMUSG00000062515	Fabp4	-0.229474	0.00060005	0.0143877
666	ENSMUSG00000042613	Pbxip1	0.499838	0.000609717	0.0145975
667	ENSMUSG00000038633	Degs1	0.319475	0.000613989	0.0146777
668	ENSMUSG00000037216	Lipt1	-0.335869	0.000616008	0.014682
669	ENSMUSG00000025817	Nudt5	-0.198967	0.000615684	0.014682
670	ENSMUSG00000079557	Marchf2	-0.209524	0.000621908	0.0148005
671	ENSMUSG00000097177	9330159M07Rik	-0.412316	0.000622871	0.0148013
672	ENSMUSG00000045730	Adrb2	0.887236	0.000624194	0.0148107
673	ENSMUSG00000001576	Ergic1	-0.280545	0.000627731	0.0148725
674	ENSMUSG00000030122	Ptms	-0.242801	0.000631382	0.0149146
675	ENSMUSG00000022863	Btg3	-0.297843	0.000630724	0.0149146
676	ENSMUSG00000053012	Krcc1	-0.306402	0.000632965	0.0149299
677	ENSMUSG00000021559	Dapk1	0.434163	0.00064488	0.0151885
678	ENSMUSG00000040462	Os9	0.183889	0.000645967	0.0151916
679	ENSMUSG00000044337	Ackr3	1.19952	0.000651158	0.0152388
680	ENSMUSG00000021096	Ppm1a	-0.222894	0.00065072	0.0152388
681	ENSMUSG00000050545	Fam228b	-0.49574	0.000651796	0.0152388
682	ENSMUSG00000097080	1700086O06Rik	-0.524981	0.000650835	0.0152388
683	ENSMUSG00000003644	Rps6ka1	-0.597999	0.000655928	0.0153109
684	ENSMUSG00000039745	Htatip2	-0.281885	0.000656798	0.0153109
685	ENSMUSG00000037787	Coa8	-0.25393	0.000659493	0.0153513
686	ENSMUSG00000037379	Spon2	1.25551	0.000664581	0.0154133
687	ENSMUSG00000043866	Taf10	-0.243416	0.000666025	0.0154133
688	ENSMUSG00000004040	Stat3	0.32723	0.000665053	0.0154133
689	ENSMUSG00000043445	Pgp	-0.357722	0.00066602	0.0154133
690	ENSMUSG00000021576	Pdcd6	-0.20365	0.000667028	0.0154141
691	ENSMUSG00000017144	Rnd3	0.619175	0.000674373	0.0155613
692	ENSMUSG00000113637	Gm7049	-0.959826	0.000677547	0.0156075
693	ENSMUSG00000091277	Gm1818	-0.299603	0.000678331	0.0156075
694	ENSMUSG00000003546	Klc4	-0.300387	0.000688893	0.0158277
695	ENSMUSG00000063428	Ddo	-0.31925	0.000694535	0.0159343
696	ENSMUSG00000002900	Lamb1	0.353148	0.000698301	0.0159977
697	ENSMUSG00000029775	Klhdc10	-0.177709	0.000699333	0.0159984
698	ENSMUSG00000042726	Trafd1	0.442597	0.000700718	0.0160071
699	ENSMUSG00000001323	Srr	-0.261064	0.00070237	0.0160219
700	ENSMUSG00000059970	Hspa2	0.764633	0.000704148	0.0160395
701	ENSMUSG00000056116	H2-T22	0.617713	0.000712116	0.0161978
702	ENSMUSG00000024661	Fth1	-0.288579	0.000714324	0.0162249
703	ENSMUSG00000027374	Mrps5	-0.233555	0.000718382	0.0162939
704	ENSMUSG00000037106	Fer1l6	-0.952442	0.000722011	0.0163529
705	ENSMUSG00000022772	Senp5	-0.214681	0.00072916	0.0164914
706	ENSMUSG00000038696	Mapkap1	-0.23998	0.000734423	0.0164935
707	ENSMUSG00000030861	Acadsb	0.156384	0.000730723	0.0164935
708	ENSMUSG00000038894	Irs2	1.62261	0.000734356	0.0164935
709	ENSMUSG00000049076	Acap2	0.249586	0.000731336	0.0164935
710	ENSMUSG00000015599	Ttbk1	-1.23076	0.00073311	0.0164935
711	ENSMUSG00000039804	Ncoa5	0.413893	0.000739659	0.0165877
712	ENSMUSG00000034525	Ice1	0.307357	0.000740969	0.0165938
713	ENSMUSG00000029173	Sepsecs	-0.306491	0.000746055	0.0166842
714	ENSMUSG00000036918	Ttc7	-0.41479	0.000749655	0.0167413
715	ENSMUSG00000010660	Plcd1	0.31468	0.000753881	0.0168121
716	ENSMUSG00000038781	Stap2	-0.345527	0.000757167	0.0168618
717	ENSMUSG00000020253	Ppm1m	-0.316492	0.000759202	0.0168835
718	ENSMUSG00000041423	Paqr6	0.700602	0.000761202	0.0169044
719	ENSMUSG00000023828	Slc22a3	0.349765	0.000763852	0.0169397
720	ENSMUSG00000026087	Mrpl30	-0.212627	0.000770521	0.0170402
721	ENSMUSG00000019718	L3hypdh	-0.242307	0.000770279	0.0170402
722	ENSMUSG00000022508	Bcl6	1.02955	0.000773965	0.0170926
723	ENSMUSG00000026853	Crat	-0.228015	0.000781633	0.0172377
724	ENSMUSG00000006205	Htra1	0.333587	0.000784857	0.0172377
725	ENSMUSG00000034707	Gns	0.215041	0.000784644	0.0172377
726	ENSMUSG00000020232	Hmg20b	-0.323666	0.000783679	0.0172377
727	ENSMUSG00000033793	Atp6v1h	-0.209745	0.000793315	0.0173756
728	ENSMUSG00000005566	Trim28	0.28995	0.000793259	0.0173756
729	ENSMUSG00000021243	Fcf1	-0.203352	0.000804448	0.0175952
730	ENSMUSG00000025980	Hspd1	-0.306081	0.00081022	0.0176511
731	ENSMUSG00000028568	Btf3l4	-0.207312	0.000808746	0.0176511
732	ENSMUSG00000050608	Micos10	-0.219788	0.000810326	0.0176511
733	ENSMUSG00000026313	Hdac4	0.450998	0.000812187	0.0176676
734	ENSMUSG00000038679	Trps1	0.617032	0.000815601	0.0177177
735	ENSMUSG00000002885	Adgre5	0.319003	0.000828465	0.0179726
736	ENSMUSG00000031365	Zfp275	0.428112	0.000830561	0.0179735
737	ENSMUSG00000038612	Mcl1	0.314944	0.000830762	0.0179735
738	ENSMUSG00000020775	Mrpl38	-0.290625	0.000836745	0.0180723
739	ENSMUSG00000003680	Taf6l	-0.490356	0.000837594	0.0180723
740	ENSMUSG00000044018	Mrpl50	-0.217738	0.000839019	0.0180786
741	ENSMUSG00000002997	Prkar2b	-0.187363	0.000842273	0.0181242
742	ENSMUSG00000074807	Gm10762	-0.468213	0.000846989	0.0181871
743	ENSMUSG00000016382	Pls3	0.242396	0.000847474	0.0181871
744	ENSMUSG00000011752	Pgam1	-0.274519	0.000850372	0.0182247
745	ENSMUSG00000045639	Zfp629	-0.319161	0.000860564	0.0184184
746	ENSMUSG00000026594	Ralgps2	-0.58583	0.000870773	0.0185332
747	ENSMUSG00000056486	Chn1	-0.527249	0.000871395	0.0185332
748	ENSMUSG00000034855	Cxcl10	2.22155	0.000872432	0.0185332
749	ENSMUSG00000023079	Gtf2ird1	0.297391	0.000872903	0.0185332
750	ENSMUSG00000015305	Sash1	0.302926	0.000871368	0.0185332
751	ENSMUSG00000040010	Slc7a5	1.6286	0.000870894	0.0185332
752	ENSMUSG00000062232	Rapgef2	0.351379	0.000876737	0.0185899
753	ENSMUSG00000079316	Rab9	0.356375	0.000878926	0.0186115
754	ENSMUSG00000083380	Ndufb4c	-0.422762	0.000880932	0.0186293
755	ENSMUSG00000025609	Mkln1	-0.240583	0.000897052	0.018945
756	ENSMUSG00000041870	Ankrd13a	-0.295218	0.000909077	0.0191609
757	ENSMUSG00000032436	Cmtm7	0.755437	0.000909678	0.0191609
758	ENSMUSG00000000278	Scpep1	0.380984	0.000911728	0.0191788
759	ENSMUSG00000002332	Dhrs1	-0.24069	0.000916336	0.0192503
760	ENSMUSG00000027131	Emc4	-0.24663	0.000918373	0.0192598
761	ENSMUSG00000047045	Tmem164	0.348021	0.000919203	0.0192598
762	ENSMUSG00000028270	Gbp2	2.00275	0.00092498	0.0193554
763	ENSMUSG00000014077	Chp1	0.247712	0.000928595	0.0193802
764	ENSMUSG00000034211	Mrps17	-0.145593	0.000927797	0.0193802
765	ENSMUSG00000038759	Nup205	-0.383034	0.000930229	0.0193889
766	ENSMUSG00000027514	Zbp1	2.82091	0.000933205	0.0194255
767	ENSMUSG00000039699	Batf2	1.76736	0.000938549	0.0195113
768	ENSMUSG00000029569	Tmem168	0.305949	0.00094967	0.0196911
769	ENSMUSG00000097534	Gm16675	0.962254	0.000949154	0.0196911
770	ENSMUSG00000024030	Abcg1	0.472406	0.000956474	0.0198065
771	ENSMUSG00000029131	Dnajb6	-0.191133	0.000961537	0.0198855
772	ENSMUSG00000020458	Rtn4	-0.322406	0.000965609	0.019918
773	ENSMUSG00000004071	Cdip1	0.173249	0.000965231	0.019918
774	ENSMUSG00000074862	BC025920	-0.411084	0.000967015	0.0199213
775	ENSMUSG00000052684	Jun	0.654317	0.000969075	0.0199379
776	ENSMUSG00000026944	Abca2	-0.285616	0.000973983	0.0199873
777	ENSMUSG00000049225	Pdp1	0.502792	0.0009737	0.0199873
778	ENSMUSG00000033918	Parl	-0.172643	0.000977408	0.0200318
779	ENSMUSG00000020400	Tnip1	0.266543	0.000985518	0.0201721
780	ENSMUSG00000107879	9330102E08Rik	-0.48832	0.000987847	0.0201939
781	ENSMUSG00000040713	Creg1	-0.310631	0.000997542	0.0202978
782	ENSMUSG00000028140	Mrpl9	-0.189334	0.00099525	0.0202978
783	ENSMUSG00000037221	Mospd3	-0.280303	0.0009991	0.0202978
784	ENSMUSG00000030409	Dmpk	0.472659	0.000999297	0.0202978
785	ENSMUSG00000022754	Tmem45a	1.3403	0.000996575	0.0202978
786	ENSMUSG00000028690	Mmachc	-0.172596	0.00100674	0.0204229
787	ENSMUSG00000037474	Dtl	-0.623563	0.00101245	0.0205128
788	ENSMUSG00000018570	2810408A11Rik	-0.679672	0.00101427	0.0205236
789	ENSMUSG00000006356	Crip2	0.461241	0.00101774	0.0205676
790	ENSMUSG00000020649	Rrm2	0.868404	0.00102236	0.0206349
791	ENSMUSG00000054612	Mgmt	-0.438021	0.00103289	0.020821
792	ENSMUSG00000033557	Fam20b	-0.171805	0.00103623	0.020862
793	ENSMUSG00000002280	Ciao3	-0.18636	0.00103773	0.0208658
794	ENSMUSG00000021756	Il6st	0.225058	0.00104094	0.020904
795	ENSMUSG00000027488	Snta1	0.393035	0.00104412	0.0209416
796	ENSMUSG00000028885	Smpdl3b	1.70603	0.00104642	0.0209614
797	ENSMUSG00000027893	Ahcyl1	-0.263244	0.00105022	0.0210109
798	ENSMUSG00000021906	Oxnad1	-0.173382	0.00105517	0.0210572
799	ENSMUSG00000020823	Sec14l1	0.170135	0.00105451	0.0210572
800	ENSMUSG00000037710	Cisd1	-0.250311	0.00106411	0.0212091
801	ENSMUSG00000034687	Fras1	2.49031	0.00107406	0.0213009
802	ENSMUSG00000001844	Zdhhc4	-0.236079	0.00107361	0.0213009
803	ENSMUSG00000020315	Sptbn1	0.276339	0.00107302	0.0213009
804	ENSMUSG00000058672	Tubb2a	0.386735	0.00107106	0.0213009
805	ENSMUSG00000010651	Acaa1b	-0.534255	0.00107656	0.0213239
806	ENSMUSG00000026223	Itm2c	0.289555	0.00108089	0.021383
807	ENSMUSG00000028480	Glipr2	1.19845	0.00108457	0.0214192
808	ENSMUSG00000045414	Dipk2a	0.388747	0.0010854	0.0214192
809	ENSMUSG00000037419	Endod1	0.523625	0.00109322	0.0215468
810	ENSMUSG00000037503	Fam168b	-0.200415	0.00109811	0.0215802
811	ENSMUSG00000017188	Coa3	-0.250155	0.00109897	0.0215802
812	ENSMUSG00000024228	Nudt12	-0.292694	0.00109709	0.0215802
813	ENSMUSG00000041598	Cdc42ep4	0.335673	0.0011005	0.0215836
814	ENSMUSG00000019863	Qrsl1	-0.263522	0.00111119	0.0217665
815	ENSMUSG00000026260	Ndufa10	-0.225686	0.00111998	0.0219118
816	ENSMUSG00000034908	Sidt2	-0.200962	0.00112267	0.0219376
817	ENSMUSG00000053046	Brsk2	-1.17523	0.00113733	0.0221695
818	ENSMUSG00000117924	Tmem223	-0.332162	0.00113683	0.0221695
819	ENSMUSG00000092021	Gbp11	3.32897	0.00115015	0.022364
820	ENSMUSG00000056832	Ttc26	1.18991	0.00115151	0.022364
821	ENSMUSG00000066406	Akap13	0.37819	0.00114964	0.022364
822	ENSMUSG00000004270	Lpcat3	-0.274276	0.00115672	0.0224378
823	ENSMUSG00000074206	Adh6b	1.21374	0.00116251	0.0224961
824	ENSMUSG00000073433	Arhgdig	-0.618354	0.00116255	0.0224961
825	ENSMUSG00000043154	Ppp2r3a	0.589322	0.00116971	0.0226072
826	ENSMUSG00000039976	Tbc1d16	-0.459022	0.00117447	0.0226719
827	ENSMUSG00000030789	Itgax	1.97408	0.00118532	0.0228536
828	ENSMUSG00000034593	Myo5a	-0.325466	0.00119668	0.0229893
829	ENSMUSG00000021339	Mrs2	-0.256274	0.00119412	0.0229893
830	ENSMUSG00000022812	Gsk3b	-0.261371	0.00119591	0.0229893
831	ENSMUSG00000019132	BC005537	0.223327	0.00120193	0.0230622
832	ENSMUSG00000030802	Bckdk	-0.160724	0.00120629	0.0231181
833	ENSMUSG00000028860	Sytl1	-0.550745	0.00122478	0.0234339
834	ENSMUSG00000041740	Rnf10	-0.212293	0.0012257	0.0234339
835	ENSMUSG00000045231	BC106179	-1.25117	0.00123627	0.0236076
836	ENSMUSG00000025616	Usp16	-0.159896	0.00123939	0.0236131
837	ENSMUSG00000025017	Pik3ap1	1.15304	0.00123952	0.0236131
838	ENSMUSG00000037003	Tns2	0.425809	0.00124152	0.023623
839	ENSMUSG00000078922	Tgtp1	2.32391	0.00124726	0.0236757
840	ENSMUSG00000002767	Mrpl2	-0.254994	0.00124644	0.0236757
841	ENSMUSG00000032372	Plscr2	0.971921	0.00125324	0.0237608
842	ENSMUSG00000039477	Tnrc18	0.414886	0.00126064	0.0238729
843	ENSMUSG00000027673	Ndufb5	-0.201619	0.00126515	0.0239036
844	ENSMUSG00000025086	Trub1	-0.317659	0.00126526	0.0239036
845	ENSMUSG00000026496	Parp1	-0.192969	0.00127066	0.0239246
846	ENSMUSG00000049878	Rlf	0.341925	0.00127074	0.0239246
847	ENSMUSG00000058454	Dhcr7	-0.366416	0.00127088	0.0239246
848	ENSMUSG00000045838	Ccdc9b	0.524552	0.00127536	0.0239525
849	ENSMUSG00000031065	Cdk16	-0.171822	0.00127523	0.0239525
850	ENSMUSG00000022964	Tmem50b	-0.244955	0.00127803	0.0239743
851	ENSMUSG00000078154	Gm12184	-0.44737	0.00128057	0.0239938
852	ENSMUSG00000023092	Fhl1	0.639768	0.00128224	0.0239968
853	ENSMUSG00000029577	Ube3b	-0.168712	0.00128821	0.0240521
854	ENSMUSG00000023021	Cers5	0.223611	0.00128684	0.0240521
855	ENSMUSG00000010911	Apip	-0.281108	0.00129448	0.024141
856	ENSMUSG00000024835	Coro1b	-0.16354	0.00129784	0.0241753
857	ENSMUSG00000052296	Ppp6r1	0.163879	0.00130515	0.0242831
858	ENSMUSG00000047879	Usp14	-0.212381	0.0013207	0.0245437
859	ENSMUSG00000003948	Mmd	0.353525	0.0013283	0.0246563
860	ENSMUSG00000051341	Zfp52	0.758549	0.00132986	0.0246566
861	ENSMUSG00000027502	Rtf2	-0.27768	0.00134475	0.0247584
862	ENSMUSG00000040093	Bmf	0.518818	0.00134513	0.0247584
863	ENSMUSG00000029417	Cxcl9	2.0194	0.00134622	0.0247584
864	ENSMUSG00000030045	Mrpl19	-0.226936	0.0013378	0.0247584
865	ENSMUSG00000003923	Tfam	-0.19859	0.00134556	0.0247584
866	ENSMUSG00000038014	Fam120a	-0.12844	0.00134521	0.0247584
867	ENSMUSG00000042524	Sun2	0.187265	0.00134364	0.0247584
868	ENSMUSG00000031004	Mki67	1.12801	0.0013569	0.024926
869	ENSMUSG00000044667	Plppr4	0.773046	0.00136326	0.0249649
870	ENSMUSG00000032402	Smad3	0.475522	0.00136371	0.0249649
871	ENSMUSG00000013419	Zfp651	0.681599	0.00136342	0.0249649
872	ENSMUSG00000027984	Hadh	-0.217726	0.0013909	0.0254334
873	ENSMUSG00000040950	Mgl2	0.958106	0.00140749	0.0257072
874	ENSMUSG00000074151	Nlrc5	1.35107	0.0014111	0.0257437
875	ENSMUSG00000031979	Cog2	-0.325475	0.00141387	0.0257647
876	ENSMUSG00000029162	Khk	-0.361954	0.00142001	0.0258311
877	ENSMUSG00000018217	Pmp22	0.513648	0.00142075	0.0258311
878	ENSMUSG00000041313	Slc7a1	0.911642	0.0014254	0.0258861
879	ENSMUSG00000035772	Mrps2	-0.308575	0.00143298	0.0259942
880	ENSMUSG00000025208	Mrpl43	-0.282309	0.00143872	0.0260685
881	ENSMUSG00000087259	2610035D17Rik	0.936746	0.00144823	0.0262112
882	ENSMUSG00000021967	Mrpl57	-0.24138	0.00145421	0.0262502
883	ENSMUSG00000021102	Glrx5	-0.337227	0.00145378	0.0262502
884	ENSMUSG00000046434	Hnrnpa1	0.292014	0.00145533	0.0262502
885	ENSMUSG00000037386	Rims2	-1.36933	0.00145734	0.0262569
886	ENSMUSG00000002325	Irf9	0.648576	0.00146479	0.0263612
887	ENSMUSG00000028093	Acp6	-0.189168	0.00148218	0.0266442
888	ENSMUSG00000052605	Isoc2b	-0.371853	0.00148889	0.0267347
889	ENSMUSG00000078713	Tomm5	-0.278221	0.00149384	0.0267933
890	ENSMUSG00000028572	Hook1	-0.382342	0.00150372	0.0269403
891	ENSMUSG00000040128	Pnrc1	0.665708	0.0015134	0.0270707
892	ENSMUSG00000057265	Bbof1	-0.333617	0.0015144	0.0270707
893	ENSMUSG00000063972	Nr6a1	0.469285	0.00152213	0.0271784
894	ENSMUSG00000037086	Prr32	1.7007	0.00153194	0.0273231
895	ENSMUSG00000028465	Tln1	0.289934	0.00154264	0.0274831
896	ENSMUSG00000120675	ENSMUSG00000120675	-0.427551	0.00154479	0.0274908
897	ENSMUSG00000026611	Spata17	-0.555016	0.00155238	0.0275643
898	ENSMUSG00000089715	Cbx6	0.386678	0.00155201	0.0275643
899	ENSMUSG00000041939	Mvk	-0.291312	0.00155678	0.0275809
900	ENSMUSG00000020198	Ap3d1	-0.184779	0.00155674	0.0275809
901	ENSMUSG00000103114	Gm32200	0.487408	0.00156547	0.0277025
902	ENSMUSG00000034259	Exosc4	-0.237467	0.00156791	0.0277025
903	ENSMUSG00000024338	Psmb8	1.63491	0.00156885	0.0277025
904	ENSMUSG00000022223	Sdr39u1	-0.277677	0.00158362	0.0279324
905	ENSMUSG00000029777	Gars	-0.206168	0.00159127	0.0280362
906	ENSMUSG00000085132	Gm12265	-1.08815	0.00160166	0.0281866
907	ENSMUSG00000096727	Psmb9	1.68304	0.00160334	0.0281866
908	ENSMUSG00000066258	Trim12a	0.499627	0.00161138	0.0282967
909	ENSMUSG00000026103	Gls	0.319122	0.00161874	0.0283828
910	ENSMUSG00000001313	Rnd2	0.637454	0.00161984	0.0283828
911	ENSMUSG00000097187	Gm19426	1.8939	0.00162746	0.0284473
912	ENSMUSG00000074754	Smim26	-0.238049	0.00163065	0.0284473
913	ENSMUSG00000015790	Surf1	-0.198003	0.00162742	0.0284473
914	ENSMUSG00000001036	Epn2	0.403902	0.00163051	0.0284473
915	ENSMUSG00000023068	Nus1	-0.240303	0.0016361	0.0284799
916	ENSMUSG00000022711	Pmm2	-0.215567	0.00163507	0.0284799
917	ENSMUSG00000032590	Apeh	-0.188309	0.00164232	0.0285569
918	ENSMUSG00000028149	Rap1gds1	-0.187276	0.00164696	0.0286066
919	ENSMUSG00000021486	Prelid1	-0.211727	0.0016502	0.0286315
920	ENSMUSG00000005882	Uqcc1	-0.168131	0.00165569	0.0286645
921	ENSMUSG00000059119	Nap1l4	-0.229288	0.00165505	0.0286645
922	ENSMUSG00000025478	Dpysl4	1.23819	0.00166637	0.0288181
923	ENSMUSG00000035505	Cox18	-0.220169	0.00167922	0.0290089
924	ENSMUSG00000028266	Lmo4	0.427361	0.00168325	0.029047
925	ENSMUSG00000050192	Eif5a2	0.512682	0.00168994	0.0291309
926	ENSMUSG00000085024	C230035I16Rik	1.08644	0.00169472	0.0291818
927	ENSMUSG00000021650	Ptcd2	-0.199554	0.00170123	0.0292622
928	ENSMUSG00000104713	Gbp6	1.82418	0.00172624	0.0296286
929	ENSMUSG00000010936	Vac14	-0.220818	0.00172524	0.0296286
930	ENSMUSG00000106019	Gm43672	-0.288976	0.00173049	0.0296695
931	ENSMUSG00000079139	Gm4204	0.419558	0.00175775	0.0300674
932	ENSMUSG00000048578	Mlec	-0.285268	0.00175935	0.0300674
933	ENSMUSG00000031788	Kifc3	0.462834	0.00175893	0.0300674
934	ENSMUSG00000004945	Tmem242	-0.220163	0.00178738	0.0305136
935	ENSMUSG00000034610	Tut4	0.433772	0.00180302	0.0307149
936	ENSMUSG00000061130	Ppm1b	-0.237758	0.00180237	0.0307149
937	ENSMUSG00000022564	Grina	0.257895	0.00180925	0.0307881
938	ENSMUSG00000105095	8430422M14Rik	-0.544805	0.00181643	0.0308774
939	ENSMUSG00000041481	Serpina3g	2.79633	0.00182479	0.0309865
940	ENSMUSG00000041168	Lonp1	-0.203014	0.00183791	0.031176
941	ENSMUSG00000020828	Pld2	0.308878	0.00184097	0.0311948
942	ENSMUSG00000029166	Mapre3	-0.2766	0.00186272	0.0314629
943	ENSMUSG00000049323	Smcr8	0.256061	0.00186026	0.0314629
944	ENSMUSG00000085379	2310058D17Rik	-0.52525	0.00186099	0.0314629
945	ENSMUSG00000105837	Gm35986	-0.505353	0.00186563	0.0314788
946	ENSMUSG00000028359	Orm3	0.572554	0.0018707	0.0314841
947	ENSMUSG00000025432	Avil	1.9103	0.00187187	0.0314841
948	ENSMUSG00000022885	St6gal1	-0.417285	0.00187124	0.0314841
949	ENSMUSG00000064350	mt-Ty	-0.666534	0.00188003	0.0315881
950	ENSMUSG00000020719	Ddx5	-0.130294	0.00188342	0.0316116
951	ENSMUSG00000007805	Twist2	0.784852	0.00188709	0.03164
952	ENSMUSG00000004187	Kifc2	-0.37293	0.00189684	0.0317702
953	ENSMUSG00000069844	Sco1	-0.246071	0.00190224	0.0318271
954	ENSMUSG00000046879	Irgm1	1.35353	0.00190437	0.0318293
955	ENSMUSG00000037321	Tap1	1.47564	0.00190854	0.0318657
956	ENSMUSG00000027533	Fabp5	-0.478286	0.0019243	0.0320616
957	ENSMUSG00000021033	Gstz1	0.301674	0.00192351	0.0320616
958	ENSMUSG00000050549	Fam241a	-0.373006	0.00193119	0.0321428
959	ENSMUSG00000038872	Zfhx3	0.39952	0.00194223	0.0322928
960	ENSMUSG00000021079	Timm9	-0.278178	0.00194454	0.0322976
961	ENSMUSG00000082292	Gm12250	3.23937	0.00195566	0.0324485
962	ENSMUSG00000027133	Nop10	-0.196752	0.00195804	0.0324543
963	ENSMUSG00000035606	Ky	3.67438	0.00196921	0.0326055
964	ENSMUSG00000047821	Trim16	0.449078	0.00198521	0.0328363
965	ENSMUSG00000038037	Socs1	2.03375	0.00199381	0.0329444
966	ENSMUSG00000030724	Cd19	-2.80835	0.00199922	0.0329995
967	ENSMUSG00000026895	Ndufa8	-0.279142	0.0020044	0.0330508
968	ENSMUSG00000028268	Gbp3	1.44662	0.00201066	0.0331198
969	ENSMUSG00000024217	Snrpc	-0.217859	0.00201426	0.0331448
970	ENSMUSG00000020366	Mapk9	-0.203184	0.00203238	0.0334086
971	ENSMUSG00000034620	Rxylt1	-0.257206	0.00208599	0.034243
972	ENSMUSG00000024188	Luc7l	0.264361	0.00208744	0.034243
973	ENSMUSG00000025745	Hadha	-0.219093	0.00209982	0.0344108
974	ENSMUSG00000042548	Asxl1	0.344263	0.00211454	0.0346163
975	ENSMUSG00000038970	Lmtk2	0.398068	0.00212228	0.0347074
976	ENSMUSG00000033701	Acbd6	-0.254722	0.00212918	0.0347747
977	ENSMUSG00000031392	Irak1	-0.179753	0.0021311	0.0347747
978	ENSMUSG00000059920	4930453N24Rik	-0.197492	0.00213294	0.0347747
979	ENSMUSG00000021782	Dlg5	0.356138	0.00214471	0.0349144
980	ENSMUSG00000039126	Prune2	-1.09328	0.00214588	0.0349144
981	ENSMUSG00000026355	Mcm6	1.55736	0.0021506	0.0349555
982	ENSMUSG00000030979	Uros	-0.226582	0.00215379	0.0349716
983	ENSMUSG00000040151	Hs2st1	0.290605	0.00218768	0.0354454
984	ENSMUSG00000030341	Tnfrsf1a	0.223561	0.00218782	0.0354454
985	ENSMUSG00000047547	Cltb	0.253073	0.00218963	0.0354454
986	ENSMUSG00000100975	Gm28875	0.567697	0.00219727	0.035523
987	ENSMUSG00000024067	Dpy30	-0.325433	0.00219888	0.035523
988	ENSMUSG00000029672	Fam3c	-0.270241	0.00221643	0.0356979
989	ENSMUSG00000032370	Lactb	-0.232242	0.00221289	0.0356979
990	ENSMUSG00000005262	Ufd1	-0.150769	0.00221448	0.0356979
991	ENSMUSG00000110256	Gm45412	-0.793248	0.00222326	0.0357718
992	ENSMUSG00000120133	ENSMUSG00000120133	-0.342869	0.00222727	0.0358003
993	ENSMUSG00000030096	Slc6a6	0.308154	0.00223579	0.035901
994	ENSMUSG00000020664	Dld	-0.210122	0.00225528	0.0361775
995	ENSMUSG00000038302	Afg1l	-0.236304	0.00227493	0.0364195
996	ENSMUSG00000039910	Cited2	0.762523	0.00227454	0.0364195
997	ENSMUSG00000051232	Tmem199	-0.262744	0.00230657	0.0368889
998	ENSMUSG00000030917	Tmem159	0.361674	0.00231634	0.0369764
999	ENSMUSG00000020075	Ddx21	0.209826	0.00231668	0.0369764
1000	ENSMUSG00000028766	Alpl	-0.565934	0.00234412	0.037377
1001	ENSMUSG00000109674	Gm45470	-0.486044	0.00235313	0.037432
1002	ENSMUSG00000024870	Rab1b	-0.1541	0.00235118	0.037432
1003	ENSMUSG00000054237	Fra10ac1	-0.252847	0.00235461	0.037432
1004	ENSMUSG00000020668	Kif3c	0.474063	0.00236696	0.0375908
1005	ENSMUSG00000032534	Cep63	-0.232097	0.00237071	0.0376129
1006	ENSMUSG00000016257	Prelid3b	-0.328463	0.00238602	0.0376195
1007	ENSMUSG00000002228	Ppm1j	1.8334	0.00238353	0.0376195
1008	ENSMUSG00000032412	Atp1b3	0.201457	0.00237577	0.0376195
1009	ENSMUSG00000020988	L2hgdh	-0.228703	0.00238043	0.0376195
1010	ENSMUSG00000024253	Dync2li1	0.727939	0.00238764	0.0376195
1011	ENSMUSG00000024308	Tapbp	0.517046	0.00238123	0.0376195
1012	ENSMUSG00000038754	Elovl3	-0.957882	0.00238729	0.0376195
1013	ENSMUSG00000101089	2610016A17Rik	0.951857	0.00241754	0.038053
1014	ENSMUSG00000037202	Prf1	2.2846	0.00242185	0.0380832
1015	ENSMUSG00000022892	App	0.255754	0.00242505	0.038096
1016	ENSMUSG00000021959	Lats2	-0.281847	0.00245835	0.038581
1017	ENSMUSG00000005575	Ube2m	-0.179171	0.00248582	0.0389739
1018	ENSMUSG00000086216	Gm13610	-0.736866	0.00250258	0.0390861
1019	ENSMUSG00000027371	Fahd2a	-0.252475	0.00250015	0.0390861
1020	ENSMUSG00000050043	Tmx2	-0.213546	0.00250098	0.0390861
1021	ENSMUSG00000038007	Acer2	0.511106	0.00250278	0.0390861
1022	ENSMUSG00000064145	Arih2	-0.203266	0.00250588	0.0390961
1023	ENSMUSG00000031626	Sorbs2	0.681213	0.00251726	0.0391273
1024	ENSMUSG00000031502	Col4a1	0.271926	0.0025177	0.0391273
1025	ENSMUSG00000072294	Klf12	1.1613	0.00251756	0.0391273
1026	ENSMUSG00000034126	Pomt2	0.271209	0.00251145	0.0391273
1027	ENSMUSG00000030087	Klf15	0.923351	0.00254545	0.0395201
1028	ENSMUSG00000020088	Sar1a	0.156267	0.00256182	0.0397356
1029	ENSMUSG00000028514	Usp24	0.198636	0.00257028	0.0398281
1030	ENSMUSG00000042569	Dhrs7b	-0.206956	0.00257712	0.0398954
1031	ENSMUSG00000002808	Epdr1	1.36072	0.00258227	0.0399362
1032	ENSMUSG00000051154	Commd3	-0.204914	0.00258585	0.0399528
1033	ENSMUSG00000061559	Wdr61	-0.265434	0.00259627	0.040075
1034	ENSMUSG00000026972	Arrdc1	0.52821	0.00259926	0.0400824
1035	ENSMUSG00000104667	Gm4961	-0.688449	0.00261852	0.0403404
1036	ENSMUSG00000097157	Gm26512	0.815289	0.00264344	0.0406849
1037	ENSMUSG00000020638	Cmpk2	0.723276	0.00265162	0.0407716
1038	ENSMUSG00000032400	Zwilch	0.869917	0.00265864	0.0408401
1039	ENSMUSG00000120026	ENSMUSG00000120026	-0.754044	0.00266511	0.0409001
1040	ENSMUSG00000047787	Flrt1	-1.04685	0.00267958	0.0410826
1041	ENSMUSG00000075585	6330403L08Rik	0.531867	0.00269828	0.0413295
1042	ENSMUSG00000029445	Hpd	0.857176	0.00272596	0.0416694
1043	ENSMUSG00000097203	4732419C18Rik	-0.973321	0.0027257	0.0416694
1044	ENSMUSG00000021870	Slmap	-0.18329	0.00272831	0.0416694
1045	ENSMUSG00000035242	Oaz1	-0.164409	0.002742	0.0418051
1046	ENSMUSG00000001100	Poldip2	-0.247726	0.00274349	0.0418051
1047	ENSMUSG00000054263	Lifr	0.304185	0.00274506	0.0418051
1048	ENSMUSG00000006931	P3h4	0.460156	0.00275001	0.0418213
1049	ENSMUSG00000034422	Parp14	0.6247	0.00275136	0.0418213
1050	ENSMUSG00000097162	2310010J17Rik	-0.421824	0.00276048	0.0418886
1051	ENSMUSG00000117029	Gm36201	-1.26006	0.00276105	0.0418886
1052	ENSMUSG00000019370	Calm3	0.160922	0.00276985	0.0419822
1053	ENSMUSG00000021838	Samd4	1.15639	0.00278846	0.0422241
1054	ENSMUSG00000037826	Ppm1k	0.226751	0.00280505	0.042435
1055	ENSMUSG00000104011	Gm32391	-0.61805	0.0028141	0.0424913
1056	ENSMUSG00000030035	Wbp1	-0.204239	0.00281354	0.0424913
1057	ENSMUSG00000034343	Ube2f	-0.201279	0.00282473	0.0425712
1058	ENSMUSG00000040253	Gbp7	1.3085	0.00282217	0.0425712
1059	ENSMUSG00000025856	Pdgfa	0.487785	0.00285924	0.0430506
1060	ENSMUSG00000039956	Mrap	-0.261682	0.00286472	0.0430924
1061	ENSMUSG00000057177	Gsk3a	-0.192944	0.00287026	0.0431351
1062	ENSMUSG00000056131	Pgm3	-0.573648	0.00287509	0.0431669
1063	ENSMUSG00000101841	Gm11993	-0.535187	0.00287987	0.0431981
1064	ENSMUSG00000032946	Rasgrp2	0.344358	0.00289495	0.0433834
1065	ENSMUSG00000022370	Mrpl13	-0.255501	0.0029094	0.043559
1066	ENSMUSG00000029918	Mrps33	-0.242752	0.00291574	0.043613
1067	ENSMUSG00000028517	Plpp3	0.281917	0.00292003	0.0436131
1068	ENSMUSG00000098188	Sowahc	-0.183129	0.00292121	0.0436131
1069	ENSMUSG00000030161	Gabarapl1	0.274524	0.00292593	0.0436426
1070	ENSMUSG00000021619	Atg10	-0.228434	0.00293898	0.0437963
1071	ENSMUSG00000063849	Ppcdc	-0.205493	0.00295381	0.0439762
1072	ENSMUSG00000028807	Zbtb8a	0.453724	0.00295891	0.0440111
1073	ENSMUSG00000041921	Metap1d	-0.229379	0.00296208	0.0440172
1074	ENSMUSG00000017897	Eya2	0.969401	0.00296912	0.0440668
1075	ENSMUSG00000072941	Sod3	0.270246	0.00297095	0.0440668
1076	ENSMUSG00000066363	Serpina3f	3.10714	0.00297383	0.0440685
1077	ENSMUSG00000021868	Ppif	-0.241404	0.00297821	0.0440924
1078	ENSMUSG00000017754	Pltp	0.279295	0.00298155	0.0441009
1079	ENSMUSG00000021496	Pcbd2	-0.260326	0.00299776	0.0442996
1080	ENSMUSG00000028654	Mycl	1.14844	0.00300261	0.0443303
1081	ENSMUSG00000079260	Tmppe	0.613127	0.0030074	0.0443599
1082	ENSMUSG00000030301	Ccdc91	-0.465232	0.00301153	0.0443797
1083	ENSMUSG00000028195	Ccn1	0.600583	0.00301705	0.04442
1084	ENSMUSG00000033022	Cdo1	-0.245379	0.00302638	0.0445163
1085	ENSMUSG00000039313	Minar1	-1.90511	0.00304212	0.0447065
1086	ENSMUSG00000056071	S100a9	1.81309	0.00304663	0.0447317
1087	ENSMUSG00000015437	Gzmb	3.17599	0.00306189	0.0448318
1088	ENSMUSG00000044847	Lsm11	-0.58949	0.00305947	0.0448318
1089	ENSMUSG00000072946	Ptgr2	-0.208982	0.00306116	0.0448318
1090	ENSMUSG00000031214	Ophn1	0.371555	0.00307556	0.0449139
1091	ENSMUSG00000032589	Bsn	-1.09839	0.00307595	0.0449139
1092	ENSMUSG00000024037	Wdr4	-0.241329	0.00307475	0.0449139
1093	ENSMUSG00000027692	Tnik	1.27819	0.00308101	0.0449466
1094	ENSMUSG00000026784	Pdss1	-0.257451	0.00309156	0.0450593
1095	ENSMUSG00000031258	Xkrx	-0.731651	0.00310112	0.0451574
1096	ENSMUSG00000062554	Gm12751	-0.474822	0.00312058	0.0453876
1097	ENSMUSG00000022012	Enox1	-0.630247	0.00312348	0.0453876
1098	ENSMUSG00000040658	Dnph1	-0.673397	0.00312547	0.0453876
1099	ENSMUSG00000071001	Hrct1	0.383671	0.00313791	0.0454855
1100	ENSMUSG00000034190	Chmp7	-0.194271	0.00313546	0.0454855
1101	ENSMUSG00000029798	Herc6	0.838293	0.00315723	0.0455996
1102	ENSMUSG00000046718	Bst2	1.08953	0.00315551	0.0455996
1103	ENSMUSG00000046314	Stxbp6	0.622306	0.00315253	0.0455996
1104	ENSMUSG00000036292	Gramd1c	-0.390265	0.00314887	0.0455996
1105	ENSMUSG00000028369	Svep1	0.68851	0.00316165	0.0456222
1106	ENSMUSG00000028992	Nmnat1	-0.323657	0.00318171	0.045746
1107	ENSMUSG00000100691	2010320M18Rik	-0.264521	0.00317793	0.045746
1108	ENSMUSG00000032577	Mapkapk3	-0.426891	0.00318076	0.045746
1109	ENSMUSG00000024074	Crim1	0.367596	0.00317686	0.045746
1110	ENSMUSG00000036073	Galt	-0.200967	0.00319878	0.0459501
1111	ENSMUSG00000038259	Gdf5	0.852909	0.00320584	0.0459686
1112	ENSMUSG00000044792	Isca1	-0.159328	0.00320569	0.0459686
1113	ENSMUSG00000017837	Nkiras2	-0.168435	0.00323026	0.0462771
1114	ENSMUSG00000102869	Norad	0.2122	0.00324017	0.0462955
1115	ENSMUSG00000058586	Serhl	-0.282555	0.00324025	0.0462955
1116	ENSMUSG00000022237	Ankrd33b	1.05278	0.00323945	0.0462955
1117	ENSMUSG00000027335	Adra1d	0.402264	0.00324906	0.0463383
1118	ENSMUSG00000048142	Nat8l	-0.414421	0.00324888	0.0463383
1119	ENSMUSG00000026283	Ing5	0.371479	0.0032667	0.0465067
1120	ENSMUSG00000018800	Abca5	0.35061	0.00326385	0.0465067
1121	ENSMUSG00000116903	Gm19522	-0.388244	0.00328134	0.0466734
1122	ENSMUSG00000026632	Tatdn3	-0.332061	0.00328576	0.0466811
1123	ENSMUSG00000035275	Raver2	-0.416538	0.00328773	0.0466811
1124	ENSMUSG00000027363	Usp8	-0.167324	0.00329474	0.046739
1125	ENSMUSG00000026389	Steap3	0.326374	0.00330014	0.0467643
1126	ENSMUSG00000120084	ENSMUSG00000120084	-1.11134	0.00330239	0.0467643
1127	ENSMUSG00000025969	Nrp2	0.27404	0.00330724	0.0467914
1128	ENSMUSG00000044365	Cxxc4	-0.981533	0.00331798	0.0469017
1129	ENSMUSG00000115324	4930527F14Rik	1.31379	0.00332526	0.0469268
1130	ENSMUSG00000024712	Rfk	-0.202129	0.00332563	0.0469268
1131	ENSMUSG00000017307	Acot8	-0.311179	0.00333083	0.0469585
1132	ENSMUSG00000025764	Jade1	0.262345	0.00335236	0.0472203
1133	ENSMUSG00000051998	Lax1	2.42501	0.00335962	0.047239
1134	ENSMUSG00000020532	Acaca	-0.323292	0.00335745	0.047239
1135	ENSMUSG00000025283	Sat1	0.194542	0.00336407	0.0472601
1136	ENSMUSG00000027104	Atf2	-0.182285	0.0033754	0.0473775
1137	ENSMUSG00000034903	Cobll1	0.323741	0.00338149	0.0473826
1138	ENSMUSG00000003154	Foxj2	0.334688	0.00338171	0.0473826
1139	ENSMUSG00000009376	Met	-0.261093	0.00339395	0.0473875
1140	ENSMUSG00000029772	Ahcyl2	0.412734	0.00339238	0.0473875
1141	ENSMUSG00000024304	Cdh2	0.303798	0.0033921	0.0473875
1142	ENSMUSG00000024589	Nedd4l	0.337129	0.00338916	0.0473875
1143	ENSMUSG00000053040	Aph1c	0.679588	0.0033997	0.0474263
1144	ENSMUSG00000027822	Slc33a1	0.245237	0.00342489	0.0476942
1145	ENSMUSG00000118049	Gm50103	-0.400005	0.00342429	0.0476942
1146	ENSMUSG00000106568	Gm42814	-0.695003	0.00343243	0.0477576
1147	ENSMUSG00000022571	Pycrl	-0.240848	0.00344938	0.0479514
1148	ENSMUSG00000022517	Mgrn1	-0.157773	0.00345367	0.0479693
1149	ENSMUSG00000030157	Clec2d	0.537348	0.00347257	0.0481793
1150	ENSMUSG00000062524	Ncr1	2.63055	0.00347483	0.0481793
1151	ENSMUSG00000028793	Rnf19b	0.455192	0.00348538	0.0482835
1152	ENSMUSG00000024480	Ap3s1	-0.18074	0.00350289	0.0484841
1153	ENSMUSG00000037531	Mrpl47	-0.270991	0.00351388	0.0485939
1154	ENSMUSG00000090942	F830016B08Rik	2.88956	0.00351961	0.0486309
1155	ENSMUSG00000024097	Srsf7	0.374577	0.00352382	0.048647
1156	ENSMUSG00000008976	Gabpa	-0.291412	0.00353435	0.0487501
1157	ENSMUSG00000025656	Arhgef9	-0.303402	0.00354445	0.0488473
1158	ENSMUSG00000006010	Odr4	-0.158683	0.00356511	0.0490049
1159	ENSMUSG00000024359	Hspa9	-0.218987	0.00356298	0.0490049
1160	ENSMUSG00000041891	Lman1	-0.270445	0.00356027	0.0490049
1161	ENSMUSG00000069049	Eif2s3y	-0.325397	0.00357819	0.0491423
1162	ENSMUSG00000073889	Il11ra1	0.346644	0.00359369	0.0493127
1163	ENSMUSG00000028847	Trappc3	-0.184026	0.00360357	0.0494058
