# Supplementary material for: LATS2 kinase integrates Hippo signalling with PPARγ repression to control brown adipocyte thermogenesis and systemic energy balance
Source: Research Square preprint supplement (doi:10.21203/rs.3.rs-7603529/v1), 2026-01-13
Supplement: Supplementary file 5 [file a14a882fcd171243b5fcd1d4.xlsx]

## Sheet: Sheet1
Supplemental Table 6: Primer sequences used in the study.
Gene name	Species	Orientation	Primer sequence (5´- 3´)
UCP1	human	Fwd	AGGTCCAAGGTGAATGCCC
		Rev	GCGGTGATTGTTCCCAGGA
RPL13A	human	Fwd	GGACCGTGCGAGGTATGCT
		Rev	ATGCCGTCAAACACCTTGAGA
Lats1	mouse	Fwd	TTCTGAGCCAAGGTGAAAGG
		Rev	GGCTGTCCAGAAGCCTCAC
Lats2	mouse	Fwd	AGCATCTCAAAGAGAATCACACC
		Rev	GAGGTGCTTCTCCGCAAA
Pparg	mouse	Fwd	GTGCCAGTTTCGATCCGTAGA
		Rev	GGCCAGCATCGTGTAGATGA
Fabp4	mouse	Fwd	GATGCCTTTGTGGGAACCT
		Rev	CTGTCGTCTGCGGTGATTT
Ucp1	mouse	Fwd	ACTGCCACACCTCCAGTCATT
		Rev	CTTTGCCTCACTCAGGATTGG
Cidea	mouse	Fwd	ATCACAACTGGCCTGGTTACG
		Rev	TACTACCCGGTGTCCATTTCT
Cox7a1	mouse	Fwd	CAGCGTCATGGTCAGTCTGT
		Rev	AGAAAACCGTGTGGCAGAGA
Cpt1b	mouse	Fwd	AGTCATGGTGGGCAACTAAC
		Rev	TGCTTGCACATTTGTGTTCTT
