# Supplementary material for: LATS2 kinase integrates Hippo signalling with PPARγ repression to control brown adipocyte thermogenesis and systemic energy balance
Source: Research Square preprint supplement (doi:10.21203/rs.3.rs-7603529/v1), 2026-01-13
Supplement: Supplementary file 6 [file c142318c55cb706855ae583b.xlsx]

## Sheet: Hárok1
Supplemental Table 4: List of overlaping DEGs in iBAT of Lats1&2fl/fl x Ucp1-CreER and control Lats1&2fl/fl mice (FDR<0.05).
			Room temperature acclimated cohort		Cold acclimated cohort		HFD fed cohort		Mean fold enrichment
Number	Gene ID	Gene name	Fold change (log2)	FDR adjusted P	Fold change (log2)	FDR adjusted P	Fold change (log2)	FDR adjusted P
1	ENSMUSG00000018849	Wwc1	2.74269	0.00173128	5.62077	6.93779e-29	4.43704	1.68898e-29	25.8536
2	ENSMUSG00000035151	Elmod2	1.94918	0.0286548	2.64085	1.68206e-117	2.41684	3.50657e-83	5.14617
3	ENSMUSG00000038618	Rassf7	1.89785	0.0105381	2.19822	2.09298e-11	1.21911	1.22403e-06	3.54792
4	ENSMUSG00000037440	Vnn1	1.44831	0.0308922	1.31575	0.0103781	0.859942	0.0153539	2.34439
5	ENSMUSG00000041423	Paqr6	1.15086	0.00245342	0.700602	0.0169044	1.61303	4.59844e-07	2.30153
6	ENSMUSG00000025511	Tspan4	1.05601	0.000336157	1.24391	5.6327e-19	1.04577	6.98657e-05	2.17068
7	ENSMUSG00000032531	Amotl2	1.17384	0.0421327	0.984799	8.46701e-07	1.13264	1.50778e-08	2.14258
8	ENSMUSG00000044674	Fzd1	0.71652	0.0100434	1.27051	3.54078e-09	1.23348	4.5446e-07	2.13567
9	ENSMUSG00000021411	Pxdc1	0.921568	0.0135809	1.56922	5.5419e-21	0.500822	0.0102846	2.09221
10	ENSMUSG00000020142	Slc1a4	1.01083	0.0421327	0.865259	0.00597159	1.2713	3.24196e-05	2.08351
11	ENSMUSG00000073460	Pnldc1	1.28706	5.51337e-05	1.12109	1.02825e-08	0.555118	0.0164414	2.02824
12	ENSMUSG00000034006	Slc66a2	0.937293	4.28752e-05	0.92867	1.13021e-11	1.05765	2.09751e-05	1.96666
13	ENSMUSG00000030605	Mfge8	0.999894	3.21733e-06	1.02077	8.17156e-27	0.813906	0.0122464	1.92894
14	ENSMUSG00000089774	Slc5a3	1.04907	0.00997596	0.904412	2.46212e-10	0.623047	0.000730782	1.82703
15	ENSMUSG00000040339	Fam102b	0.874736	0.000159385	1.03313	1.51558e-10	0.544949	0.036446	1.7797
16	ENSMUSG00000069833	Ahnak	0.812175	7.26557e-05	1.08942	3.01338e-09	0.499357	0.000493054	1.76578
17	ENSMUSG00000052957	Gas1	0.853761	0.0329203	0.610338	2.77962e-05	0.958904	0.00800364	1.75922
18	ENSMUSG00000051236	Msrb3	0.652576	0.0101634	1.13588	1.05184e-14	0.515103	1.506e-08	1.73287
19	ENSMUSG00000057329	Bcl2	0.666911	0.0436442	1.14763	0.000884271	0.469277	0.0465397	1.7292
20	ENSMUSG00000057561	Eif1a	0.849101	0.00608365	1.01275	1.92968e-11	0.406453	0.00281055	1.71485
21	ENSMUSG00000025348	Itga7	0.69671	0.000341527	0.929262	2.38402e-09	0.623056	0.0120704	1.68841
22	ENSMUSG00000050052	Tdrp	0.690997	0.0467815	0.769257	1.74791e-06	0.704858	3.9835e-05	1.64959
23	ENSMUSG00000058793	Cds2	0.594747	7.52905e-15	0.634269	2.48241e-06	0.818358	8.15716e-08	1.60859
24	ENSMUSG00000052926	Rnaseh2a	0.690422	0.0337366	0.556691	0.000543314	0.695002	1.84766e-05	1.56784
25	ENSMUSG00000026623	Lpgat1	0.66137	0.00481254	0.711692	4.80705e-07	0.417648	0.0214289	1.51835
26	ENSMUSG00000016128	Stard13	0.513325	0.0234464	0.809016	2.24065e-13	0.323412	0.0467952	1.47688
27	ENSMUSG00000036580	Spg20	0.436182	0.0467815	0.422208	0.000272364	0.644177	7.55607e-05	1.41861
28	ENSMUSG00000031996	Aplp2	0.537168	0.0111504	0.50152	1.93688e-06	0.445537	2.80052e-05	1.40955
29	ENSMUSG00000038582	Pptc7	0.469593	0.00650797	0.260975	0.00610705	0.615153	0.00598308	1.37158
30	ENSMUSG00000038970	Lmtk2	0.464219	0.0329203	0.398068	0.0347074	0.358839	0.000769979	1.32657
31	ENSMUSG00000030770	Parva	0.412745	0.000131146	0.463774	2.97086e-05	0.324163	0.00300876	1.32077
32	ENSMUSG00000018340	Anxa6	0.40074	3.21733e-06	0.423015	1.49956e-10	0.37107	0.0011928	1.31807
33	ENSMUSG00000073481	Mtarc2	0.37792	0.0149324	0.38576	0.00185838	0.271074	0.00280109	1.27091
34	ENSMUSG00000034707	Gns	0.334775	0.00195705	0.215041	0.0172377	0.451103	6.35184e-09	1.263
35	ENSMUSG00000026701	Prdx6	0.38738	2.91364e-18	0.317392	0.00862048	0.27618	0.00741039	1.25503
36	ENSMUSG00000014077	Chp1	0.290978	0.0477308	0.247712	0.0193802	0.275678	0.0109356	1.20712
37	ENSMUSG00000005575	Ube2m	-0.252017	0.00454846	-0.179171	0.0389739	-0.246848	0.0221211	0.855222
38	ENSMUSG00000049327	Kmt5a	-0.302306	0.0444136	-0.386442	3.41018e-05	-0.535816	0.0026973	0.755246
39	ENSMUSG00000033022	Cdo1	-0.491044	5.11282e-05	-0.245379	0.0445163	-0.589976	0.0106181	0.739819
40	ENSMUSG00000001576	Ergic1	-0.344338	0.0329203	-0.280545	0.0148725	-0.772584	0.00049914	0.732106
41	ENSMUSG00000079555	Haus3	-0.560919	0.0123357	-0.666441	0.00148043	-0.377761	0.0248804	0.69252
42	ENSMUSG00000028556	Dock7	-0.520948	0.0329203	-0.817548	2.44362e-07	-0.742598	1.49461e-09	0.62066
43	ENSMUSG00000040021	Lats1	-0.876284	6.23864e-08	-0.783982	3.83318e-26	-0.556524	5.54268e-12	0.601823
44	ENSMUSG00000033208	S100b	-1.17927	1.98821e-06	-0.673843	0.0012519	-3.50895	8.39166e-11	0.385417
45	ENSMUSG00000028553	Angptl3	-1.33398	0.0428409	-2.01742	8.63405e-12	-1.75729	5.27956e-06	0.313159
